# Supplementary material for: How to complete the tautomerization and substrate-assisted activation prior to C–C bond fission by meta-cleavage product hydrolase LigY?
Source: Royal Society of Chemistry journal article supplement (doi:10.1039/d0cy01102a), 2020-01-01
Supplement: d0cy01102a1.pdf [file d0cy01102a1.pdf]

1 **Supporting Information**

2

3 **How to Complete the Tautomerization and Substrate-**  
4 **assisted Activation prior to C-C Bond Fission by**  
5 **Meta-Cleavage Product Hydrolase LigY?**

6

7 <sup>1</sup>Junjie Wang, <sup>2</sup>Xiaowen Tang, <sup>1</sup>Yixin Zhang, <sup>1</sup>Yanwei Li, <sup>1</sup>Ledong Zhu,

8

<sup>1</sup>Qingzhu Zhang\*, <sup>1</sup>Wenxing Wang

9

<sup>1</sup>Environment Research Institute, Shandong University,

10

Qingdao 266237, P. R. China

11

<sup>2</sup>School of Pharmaceutical Sciences, Sun Yat-sen University,

12

Guangzhou 510006, P. R. China

13

14

15

16

17

18

19 AUTHOR INFORMATION

20

21 **Corresponding Author**

22 \*Author to whom correspondence should be addressed. Email: [zqz@sdu.edu.cn](mailto:zqz@sdu.edu.cn)

23

24

## Table of Contents

25 **Part I. Key Bond Distances for the Hydrolysis in QM/MM Calculations .....S3**

26 **Part II. Variations of Key Distances in Two MD Systems .....S6**

27 **Part III. Proton Transfer Energy Scan .....S10**

28 **Part IV. The Three Dimensional structures among the whole reaction .....S15**

29 **Part V. Comparisons Between MD Results and QM/MM Optimization .....S19**

30 **Part VI. Cartesian Coordinates of the QM Region (SnB1-SnA4) .....S20**

31 **Part VII. Parameters for Zinc ion and Substrate .....S82**

32

33

34

35

36 **Part I. Key Bond Distances for the hydrolysis in QM/MM Calculations.**

37 Table S1. Key bond distances (Å) in the QM region (SnB3).

| species | H <sup>2</sup> -C <sup>5</sup> | H <sup>3</sup> -O <sup>3</sup> | H <sup>4</sup> -O <sup>7</sup> | H <sup>5</sup> -O <sup>2</sup> | H <sup>2</sup> -O <sup>5</sup> | H <sup>5</sup> -C <sup>5</sup> | C <sup>5</sup> -C <sup>6</sup> | O <sup>1</sup> -C <sup>6</sup> |
|---------|--------------------------------|--------------------------------|--------------------------------|--------------------------------|--------------------------------|--------------------------------|--------------------------------|--------------------------------|
| R       | 2.15                           | 1.85                           | 1.98                           | 1.91                           | 3.52                           | 3.84                           | 1.44                           | 3.95                           |
| TS1     | 1.22                           | 1.87                           | 2.01                           | 1.61                           | 3.72                           | 3.57                           | 1.49                           | 3.92                           |
| IM1     | 1.15                           | 1.88                           | 1.98                           | 1.58                           | 3.77                           | 3.68                           | 1.51                           | 4.03                           |
| IM1'    | 2.77                           | 1.86                           | 1.97                           | 2.12                           | 1.84                           | 1.11                           | 1.52                           | 3.90                           |
| TS2     | 1.10                           | 1.89                           | 1.88                           | 1.18                           | 3.56                           | 2.81                           | 1.53                           | 2.01                           |
| IM2     | 1.11                           | 1.87                           | 1.59                           | 0.99                           | 5.86                           | 2.90                           | 1.55                           | 1.50                           |
| TS3     | 1.09                           | 1.94                           | 1.76                           | 0.97                           | 5.39                           | 3.02                           | 1.98                           | 1.40                           |
| P       | 1.09                           | 2.05                           | 1.76                           | 0.97                           | 5.83                           | 3.25                           | 3.36                           | 1.31                           |

38

39

40 Table S2. Key bond distances (Å) in the QM region (SnA3).

| species | H <sup>1</sup> -C <sup>5</sup> | H <sup>3</sup> -O <sup>3</sup> | H <sup>2</sup> -O <sup>1</sup> | H <sup>2</sup> -O <sup>2</sup> | H <sup>β</sup> -O <sup>5</sup> | H <sup>α</sup> -O <sup>6</sup> | C <sup>5</sup> -C <sup>6</sup> | O <sup>1</sup> -C <sup>6</sup> |
|---------|--------------------------------|--------------------------------|--------------------------------|--------------------------------|--------------------------------|--------------------------------|--------------------------------|--------------------------------|
| R       | 2.62                           | 3.66                           | 3.66                           | 0.97                           | 2.89                           | 1.67                           | 1.42                           | 2.95                           |
| TS1     | 1.28                           | 3.60                           | 1.53                           | 1.03                           | 2.91                           | 1.78                           | 1.47                           | 2.73                           |
| IM1     | 1.10                           | 3.68                           | 1.05                           | 1.48                           | 2.93                           | 1.85                           | 1.52                           | 2.78                           |
| TS2     | 1.10                           | 3.62                           | 1.57                           | 1.04                           | 2.89                           | 1.87                           | 1.54                           | 2.14                           |
| IM2     | 1.10                           | 3.61                           | 2.03                           | 0.98                           | 2.80                           | 1.80                           | 1.56                           | 1.52                           |
| TS3     | 1.09                           | 3.54                           | 2.00                           | 0.97                           | 2.93                           | 1.70                           | 2.14                           | 1.40                           |
| P       | 1.09                           | 3.58                           | 3.04                           | 0.97                           | 2.96                           | 1.57                           | 3.60                           | 1.32                           |

41

42

43 Table S3. Key bond distances (Å) in the QM region (SnA4).

| species | H <sup>1</sup> -C <sup>5</sup> | H <sup>3</sup> -O <sup>3</sup> | H <sup>7</sup> -O <sup>1</sup> | H <sup>7</sup> -N <sup>1</sup> | H <sup>β</sup> -O <sup>4</sup> | H <sup>α</sup> -O <sup>6</sup> | C <sup>5</sup> -C <sup>6</sup> | O <sup>1</sup> -C <sup>6</sup> |
|---------|--------------------------------|--------------------------------|--------------------------------|--------------------------------|--------------------------------|--------------------------------|--------------------------------|--------------------------------|
| R       | 3.07                           | 1.88                           | 2.30                           | 1.01                           | 1.81                           | 2.01                           | 1.40                           | 3.19                           |
| TS1     | 1.24                           | 1.98                           | 1.75                           | 1.05                           | 1.85                           | 2.05                           | 1.47                           | 3.22                           |
| IM1     | 1.11                           | 2.12                           | 1.02                           | 1.62                           | 1.86                           | 2.03                           | 1.51                           | 3.72                           |
| TS2     | 1.10                           | 2.11                           | 1.03                           | 1.61                           | 1.87                           | 1.99                           | 1.51                           | 3.19                           |
| IM2     | 1.10                           | 2.20                           | 1.01                           | 1.69                           | 1.85                           | 2.05                           | 1.52                           | 3.05                           |
| TS3     | 1.10                           | 2.17                           | 1.77                           | 1.06                           | 1.86                           | 2.02                           | 1.53                           | 2.33                           |
| IM3     | 1.10                           | 1.98                           | 2.33                           | 1.02                           | 1.86                           | 2.06                           | 1.60                           | 1.48                           |
| TS4     | 1.09                           | 1.85                           | 3.32                           | 1.01                           | 1.78                           | 2.01                           | 2.24                           | 1.38                           |
| P       | 1.09                           | 1.78                           | 3.47                           | 1.01                           | 1.72                           | 1.94                           | 2.85                           | 1.33                           |

44

45

## 46 Part II. Variations of Key Distances in Two MD Systems

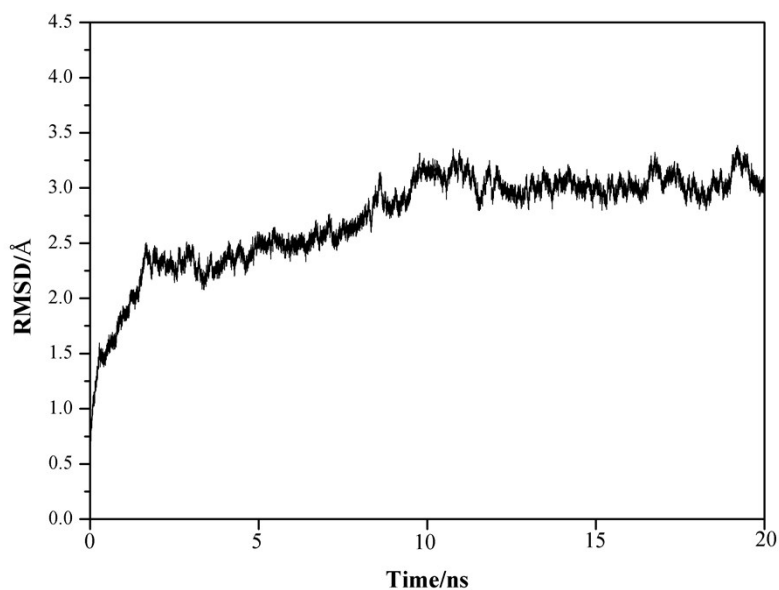

47

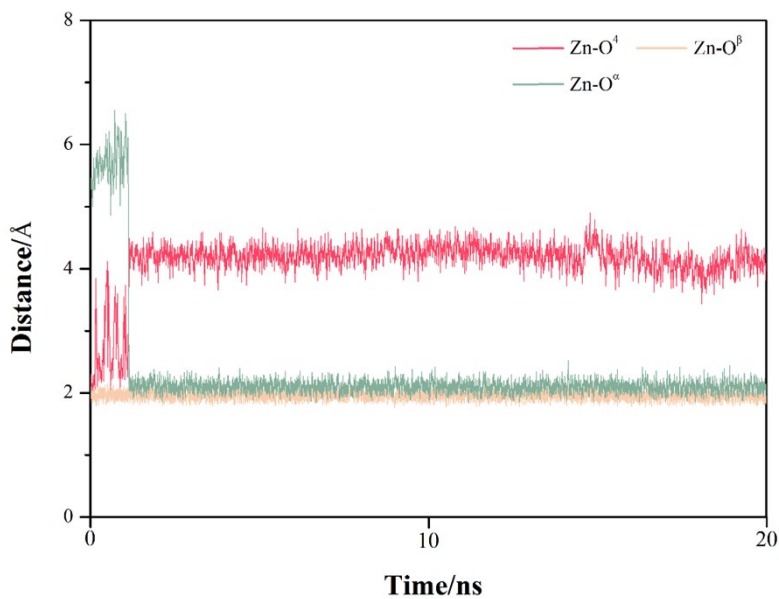

48

49 Figure S1 Root-mean-square deviations (RMSD) of the backbone for molecular  
50 dynamic simulation of System-A model. And variations of key internuclear distances  
51 ( $\text{Zn-O}^\delta$ ,  $\text{Zn-O}^\beta$  and  $\text{Zn-O}^\alpha$ ) during the molecular dynamics simulation in System-A.

52

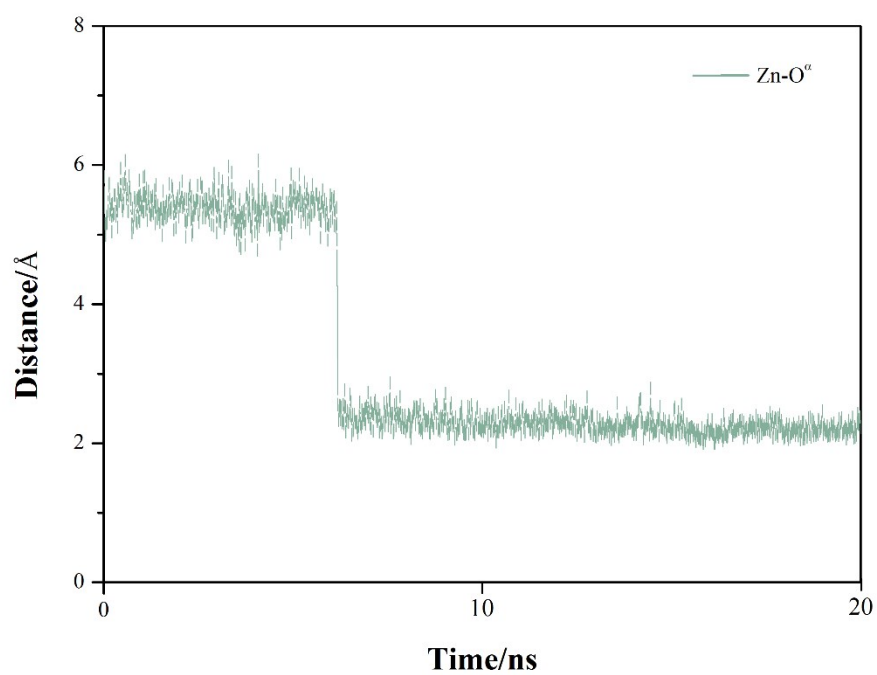

53

54 Figure S2 Variation of key internuclear distance ( $\text{Zn-O}^\alpha$ ) during the molecular  
55 dynamics simulation in System-B.

56

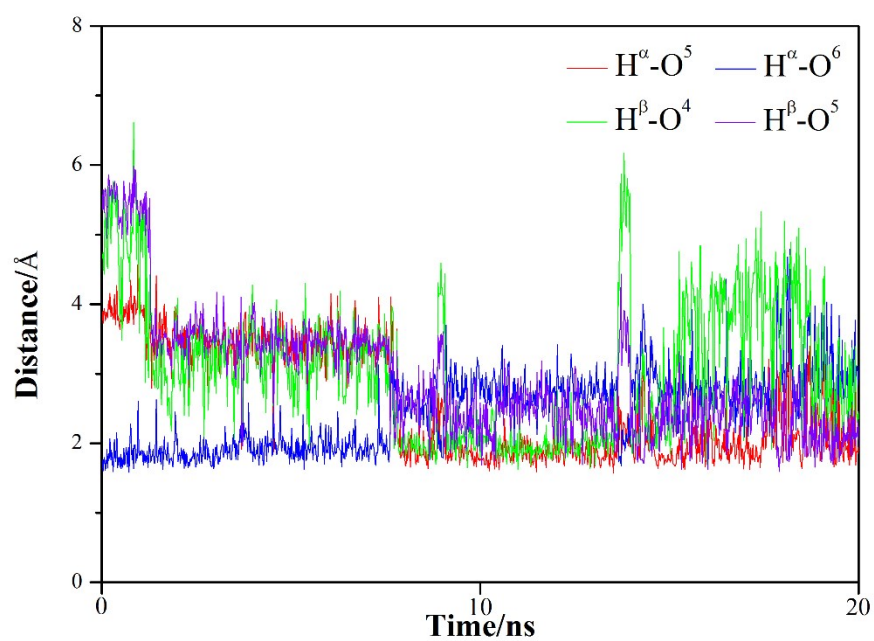

57

58 Figure S3 Variations of key internuclear distances between Arg72 and 4-carboxyl of  
59 the substrate (H<sup>α</sup>-O<sup>5</sup>, H<sup>α</sup>-O<sup>6</sup>, H<sup>β</sup>-O<sup>4</sup> and H<sup>β</sup>-O<sup>5</sup>) during the molecular dynamics  
60 simulation in System-A.

61



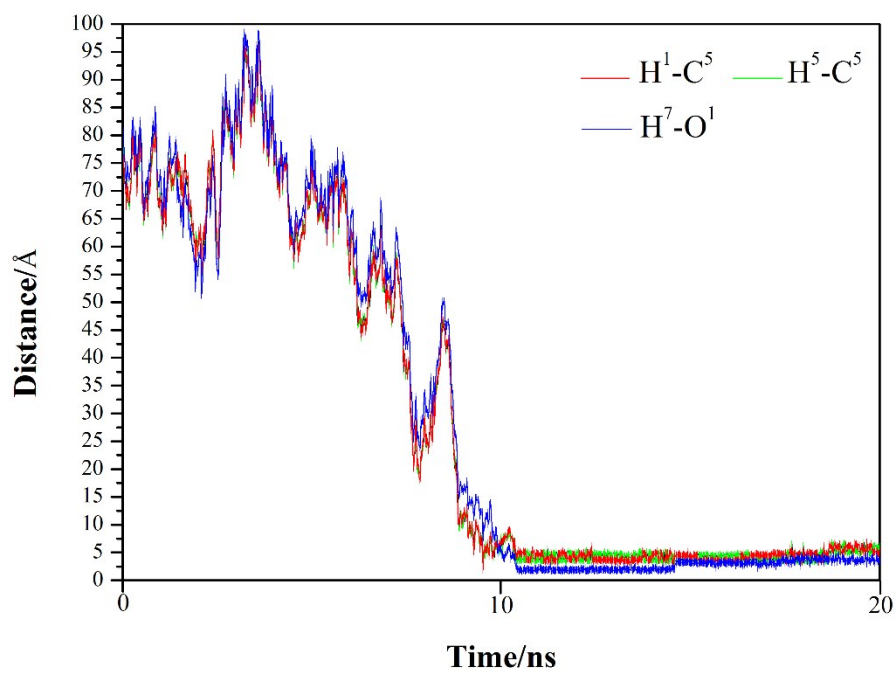

62

63 Figure S4 Variations key internuclear distances (H<sup>1</sup>-C<sup>5</sup>, H<sup>5</sup>-C<sup>5</sup> and H<sup>7</sup>-O<sup>1</sup>) during the  
64 molecular dynamics simulation in System-A. The atoms (H<sup>1</sup>, H<sup>5</sup> and O<sup>1</sup>) refer to the  
65 catalytic water in SnA4.

66

67 Part III. Proton Transfer Energy Scan

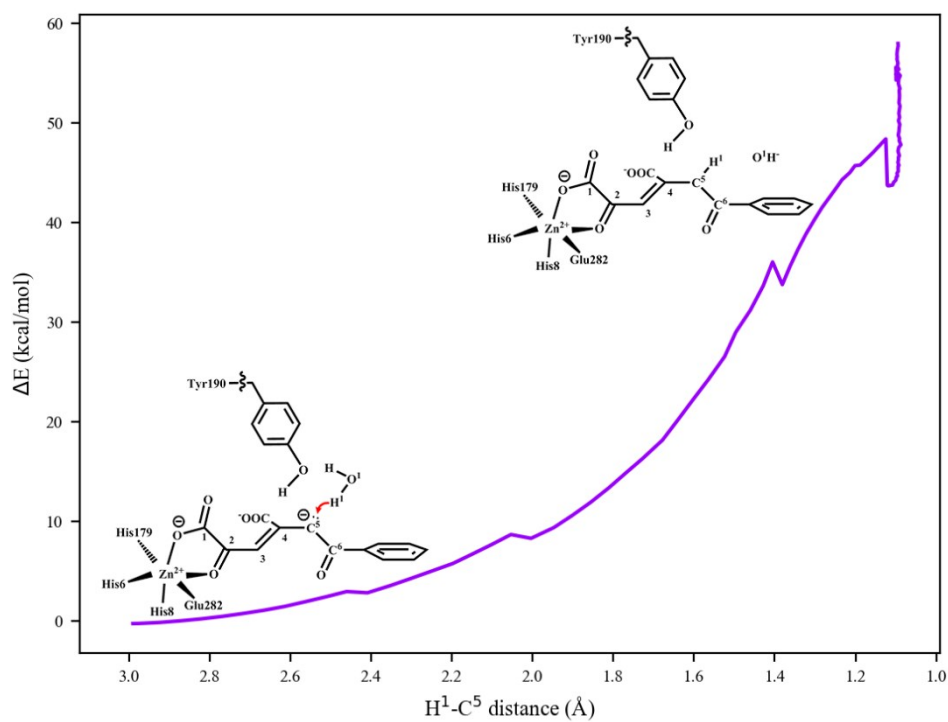

68

69 Figure S5 The M06-2X(B1)/MM energy profile along the forming H<sup>1</sup>-C<sup>5</sup> bond

70 starting from the reactant in SnB1.

71

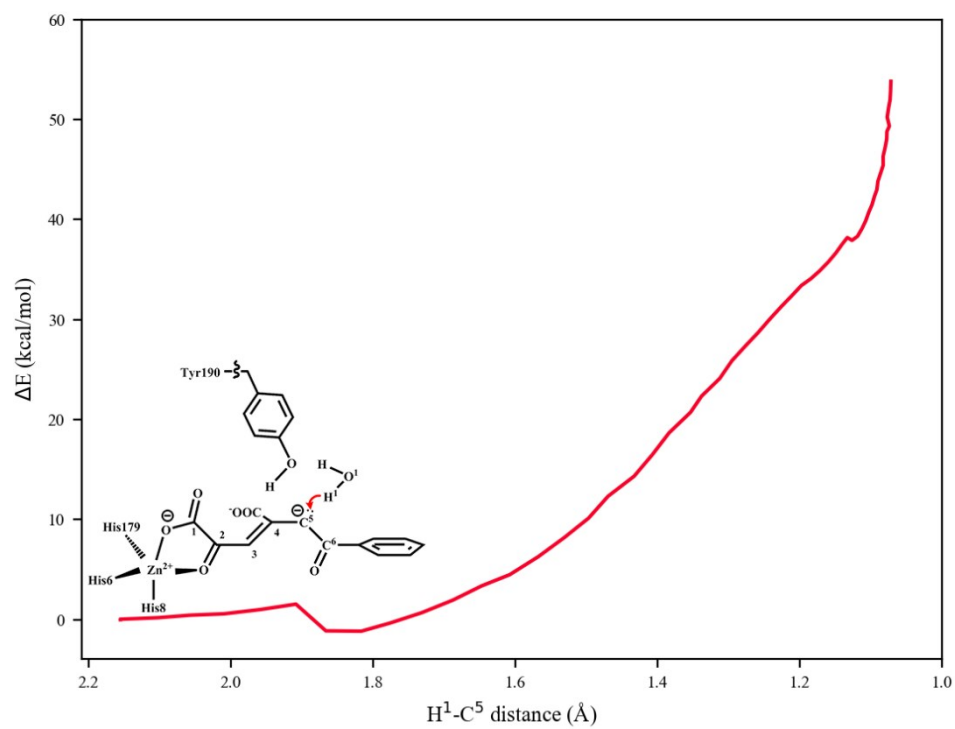

72

73 Figure S6 The M06-2X(B1)/MM energy profile along the forming H<sup>1</sup>-C<sup>5</sup> bond

74 starting from the reactant in SnB2.

75

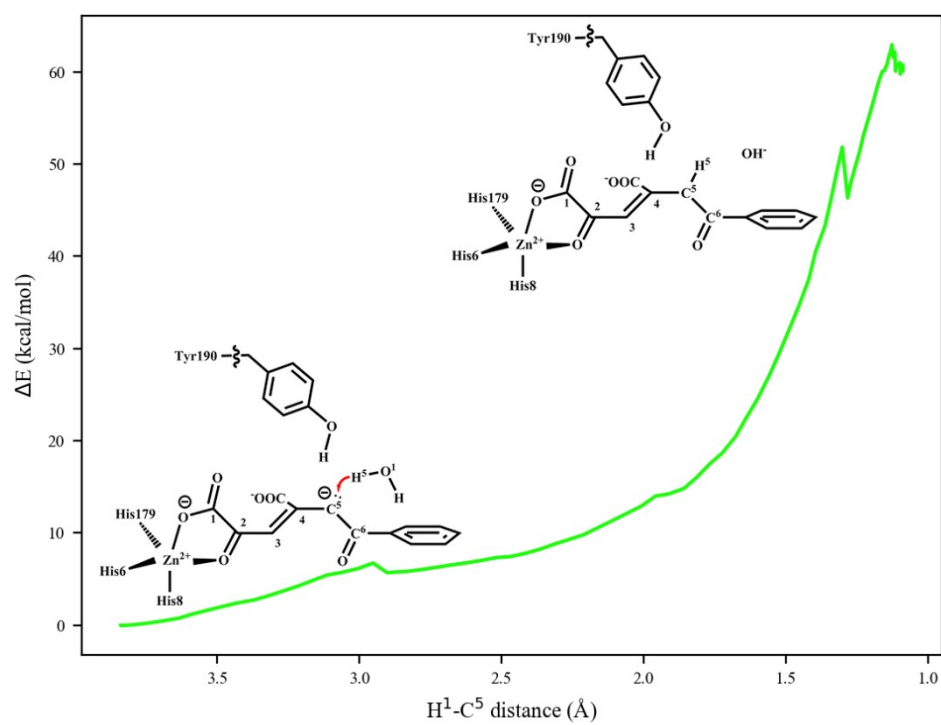

76

77 Figure S7 The M06-2X(B1)/MM energy profile along the forming H<sup>1</sup>-C<sup>5</sup> bond

78 starting from the reactant in SnB3.

79

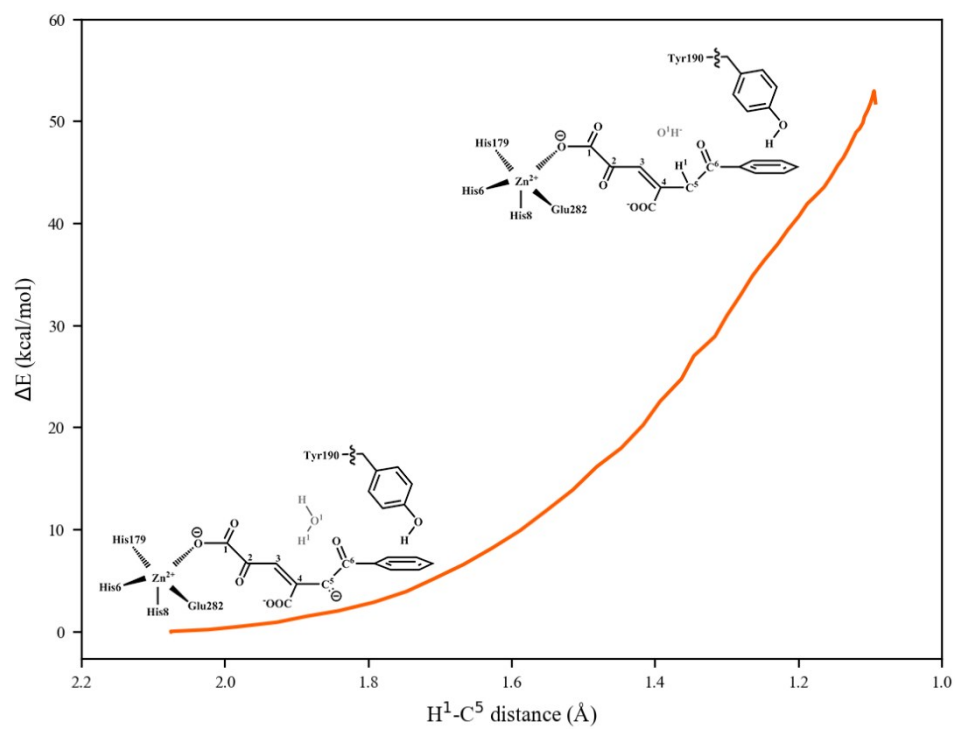

80

81 Figure S8 The M06-2X(B1)/MM energy profile along the forming H<sup>1</sup>-C<sup>5</sup> bond

82 starting from the reactant in SnA1.

83

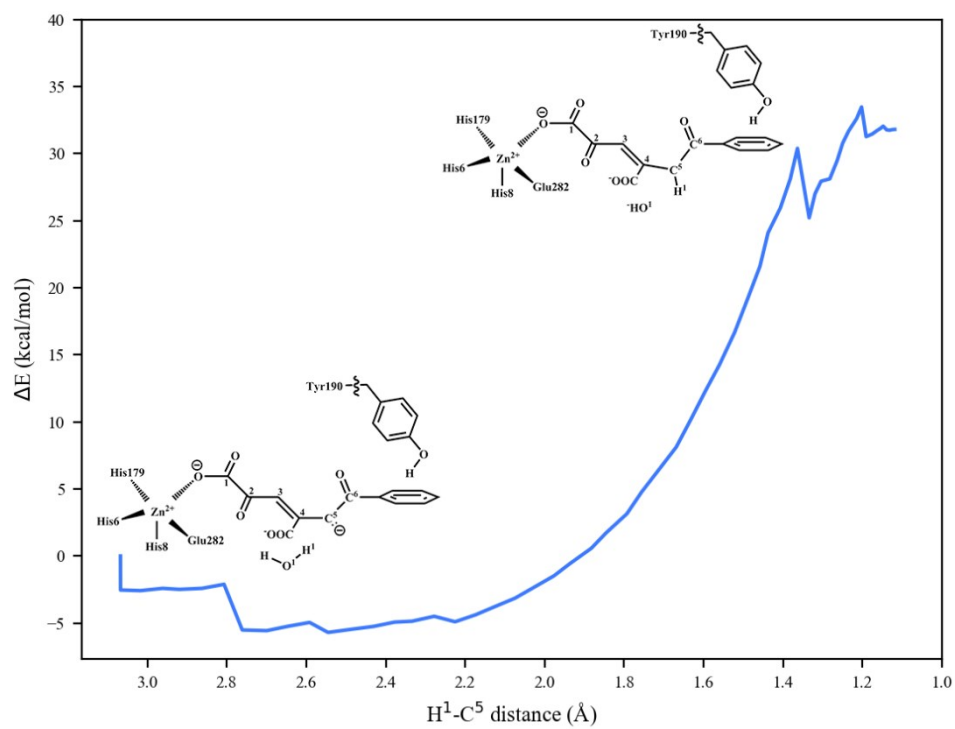

84

85 Figure S9 The M06-2X(B1)/MM energy profile along the forming  $H^1-C^5$  bond

86 starting from the reactant in SnA2.

87

88 Part IV. The Three Dimensional structures among the whole reaction

89

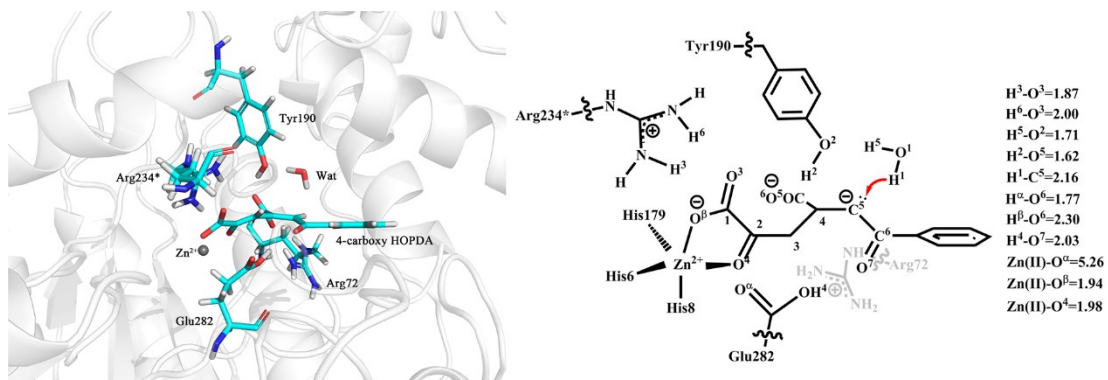

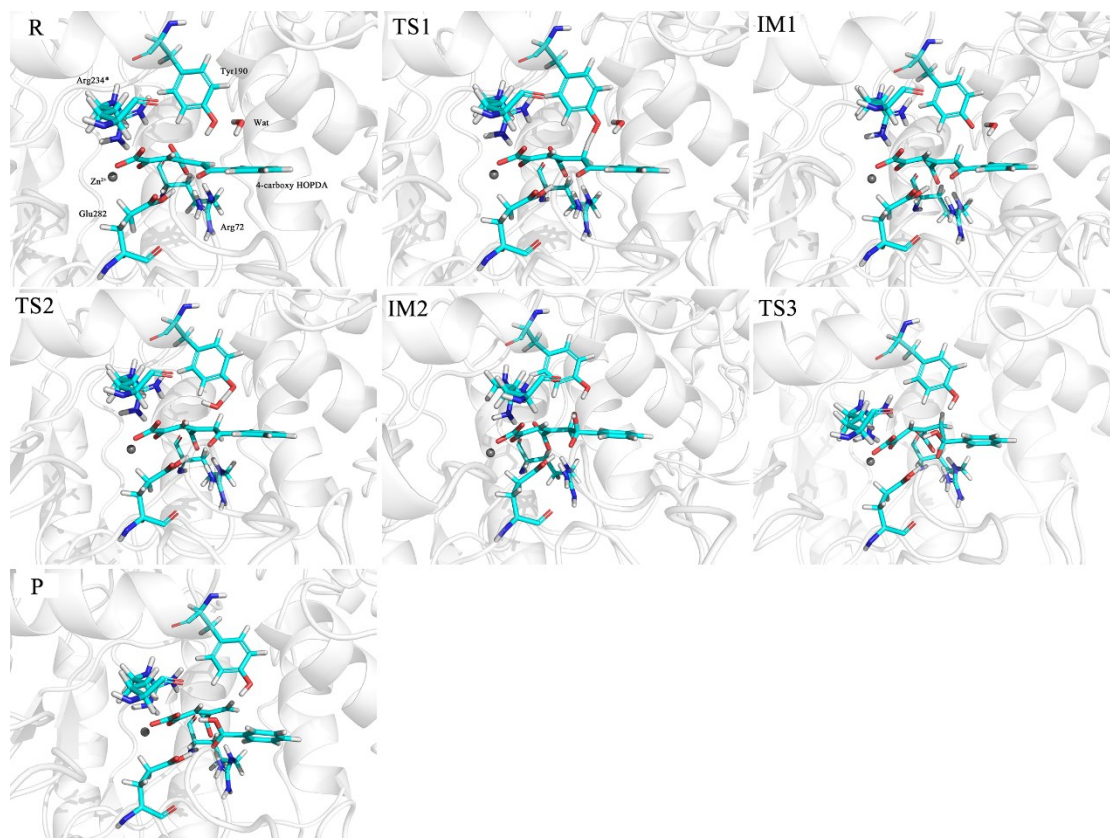

95

96 Figure S11 Optimized structures for the reactant, transition states, intermediates and

97 product among the whole catalytic reaction in SnB3 (calculated at B1 level).

98



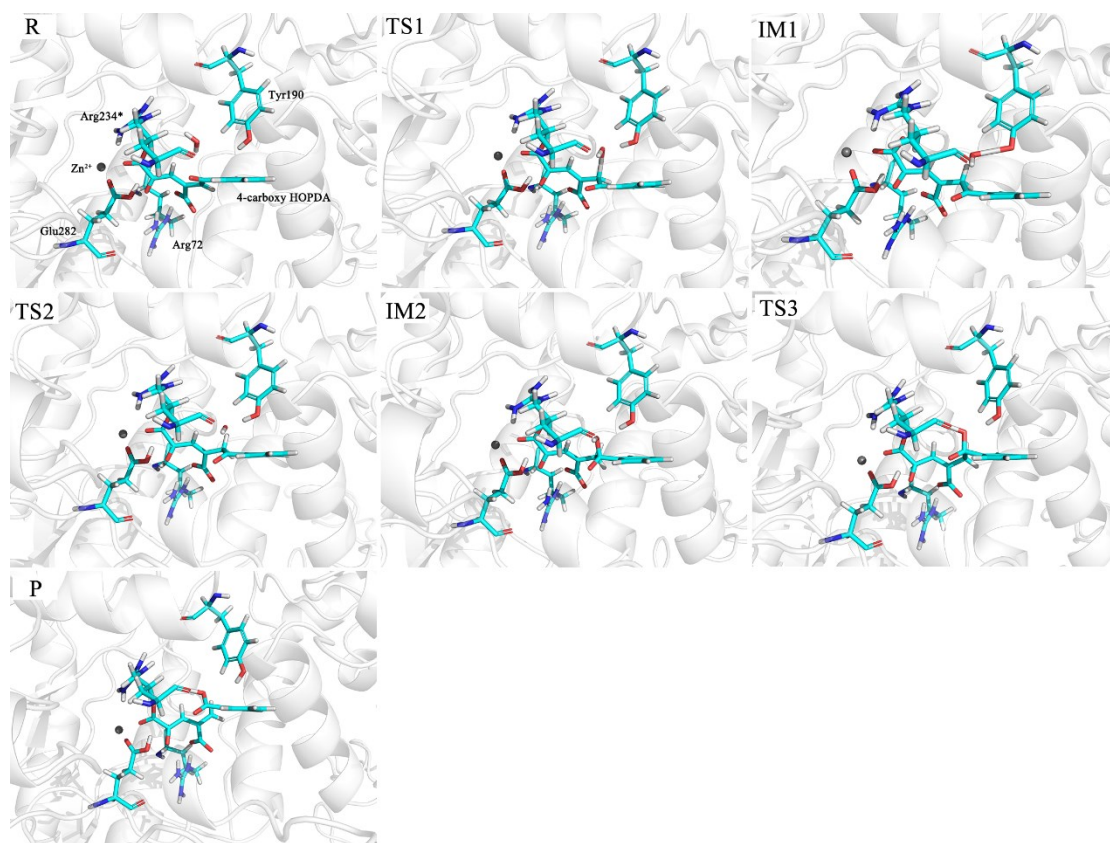

99

100 Figure S12 Optimized structures for the reactant, transition states, intermediates and

101 product among the whole catalytic reaction in SnA3 (calculated at B1 level).

102

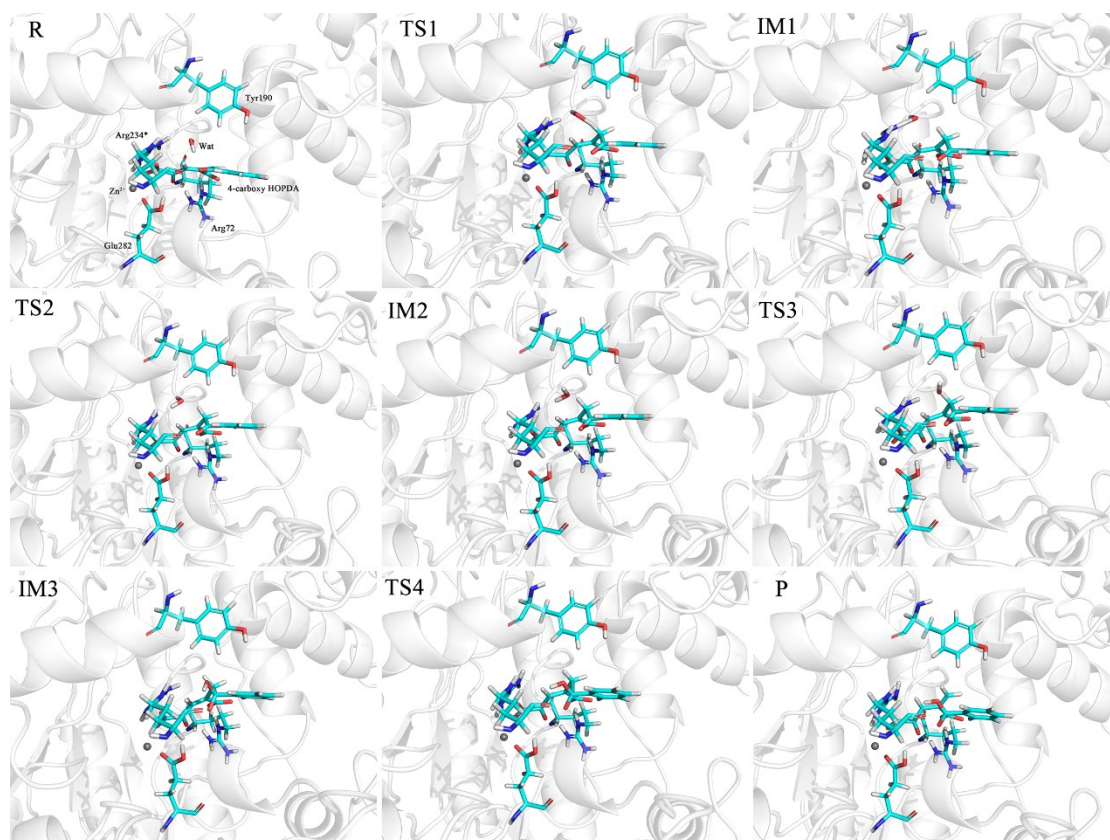

103

104 Figure S13 Optimized structures for the reactant, transition states, intermediates and  
 105 product among the whole catalytic reaction in SnA4 (calculated at B1 level).

106

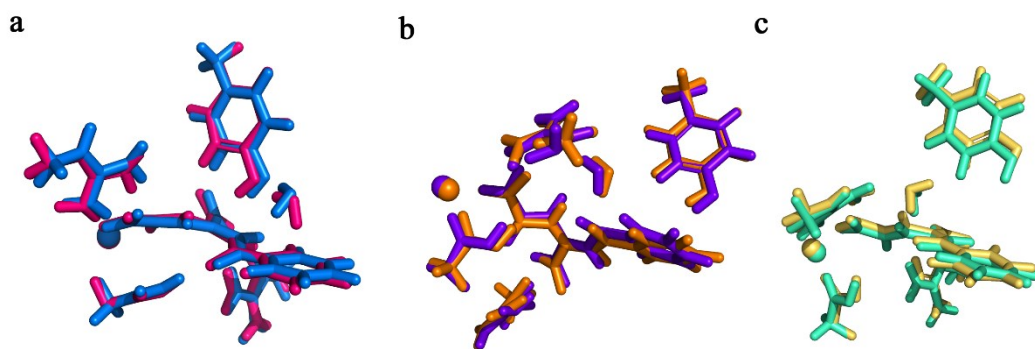

107

108 Figure S14 Superposition of QM/MM-optimized reactants and the MD results. And a

109 means the reactant of SnB3, b refers to the reactant of SnA3 and c is the reactant of

110 SnA4.

111

112

113 **Part V. Cartesian Coordinates of the QM Region (SnB1-SnA4)**

114 **SnB1**

115 **R**

|     |   |           |           |           |     |   |           |           |           |
|-----|---|-----------|-----------|-----------|-----|---|-----------|-----------|-----------|
| 116 | C | 73.120363 | 53.466243 | 57.344363 | 135 | H | 62.589285 | 47.958628 | 59.427447 |
| 117 | H | 73.336140 | 52.473494 | 57.755626 | 136 | H | 62.556071 | 49.632457 | 60.103407 |
| 118 | H | 73.993398 | 54.092945 | 57.557782 | 137 | N | 60.182594 | 47.467558 | 60.064621 |
| 119 | N | 71.955589 | 54.030990 | 58.017518 | 138 | H | 60.719505 | 46.660953 | 59.758533 |
| 120 | H | 71.810191 | 55.044782 | 58.001911 | 139 | H | 59.333296 | 47.244158 | 60.590691 |
| 121 | C | 70.947904 | 53.336636 | 58.550983 | 140 | C | 65.852672 | 59.568351 | 61.296645 |
| 122 | N | 69.758938 | 53.929082 | 58.673665 | 141 | H | 65.830050 | 59.427177 | 62.385448 |
| 123 | H | 68.992647 | 53.354850 | 59.023663 | 142 | H | 65.263366 | 60.474849 | 61.102464 |
| 124 | H | 69.534304 | 54.710215 | 58.042930 | 143 | C | 65.211308 | 58.353434 | 60.666242 |
| 125 | N | 71.103192 | 52.065163 | 58.935929 | 144 | C | 65.245051 | 57.136435 | 61.359814 |
| 126 | H | 70.250772 | 51.622495 | 59.285393 | 145 | H | 65.770882 | 57.076002 | 62.315084 |
| 127 | H | 71.973435 | 51.834896 | 59.449907 | 146 | C | 64.613985 | 56.000987 | 60.873058 |
| 128 | C | 58.902164 | 49.722547 | 61.343323 | 147 | H | 64.617987 | 55.055442 | 61.417607 |
| 129 | H | 58.289105 | 48.936152 | 60.886947 | 148 | C | 63.904062 | 56.069680 | 59.673004 |
| 130 | H | 58.423644 | 50.679040 | 61.092022 | 149 | O | 63.234763 | 54.981988 | 59.205363 |
| 131 | N | 60.232984 | 49.697225 | 60.769227 | 150 | H | 63.216837 | 54.305104 | 59.919420 |
| 132 | H | 60.896665 | 50.449989 | 61.006860 | 151 | C | 64.537674 | 58.391350 | 59.440555 |
| 133 | C | 60.822881 | 48.638119 | 60.216179 | 152 | H | 64.513038 | 59.323959 | 58.872266 |
| 134 | N | 62.068339 | 48.783978 | 59.774485 | 153 | C | 63.883741 | 57.261574 | 58.943881 |

|     |    |           |           |           |     |   |           |           |           |
|-----|----|-----------|-----------|-----------|-----|---|-----------|-----------|-----------|
| 154 | H  | 63.334917 | 57.303304 | 58.001074 | 176 | O | 65.868683 | 50.984701 | 61.776283 |
| 155 | C  | 67.104895 | 46.902380 | 59.009107 | 177 | O | 68.262347 | 51.630564 | 59.321957 |
| 156 | H  | 66.529204 | 46.852055 | 58.077667 | 178 | O | 68.493852 | 51.072514 | 61.449724 |
| 157 | H  | 66.547539 | 46.404775 | 59.810607 | 179 | O | 64.688542 | 51.442726 | 56.745108 |
| 158 | C  | 67.289777 | 48.339034 | 59.402253 | 180 | H | 63.836769 | 51.584007 | 54.573302 |
| 159 | O  | 67.189846 | 48.719501 | 60.557006 | 181 | O | 63.446878 | 53.113996 | 61.451515 |
| 160 | O  | 67.549656 | 49.151679 | 58.401227 | 182 | O | 62.566418 | 51.062105 | 61.283368 |
| 161 | H  | 67.737618 | 50.079541 | 58.699316 | 183 | H | 65.997872 | 51.995237 | 58.629645 |
| 162 | Zn | 67.352242 | 49.809610 | 62.495814 | 184 | H | 62.135802 | 51.831862 | 58.799519 |
| 163 | C  | 63.536172 | 51.563579 | 57.172527 | 185 | H | 62.090332 | 51.633186 | 52.768763 |
| 164 | C  | 62.410293 | 51.533014 | 56.163324 | 186 | H | 59.678834 | 51.497932 | 53.392210 |
| 165 | C  | 62.773164 | 51.554032 | 54.809538 | 187 | H | 59.024566 | 51.472221 | 55.797233 |
| 166 | C  | 63.330079 | 51.998228 | 60.932949 | 188 | H | 60.735665 | 51.489882 | 57.542580 |
| 167 | C  | 64.070769 | 51.806039 | 59.611791 | 189 | O | 65.084285 | 54.239431 | 56.999478 |
| 168 | C  | 65.486019 | 51.796440 | 59.565299 | 190 | H | 65.194047 | 53.278555 | 56.952128 |
| 169 | C  | 66.266513 | 51.423932 | 60.653955 | 191 | H | 64.495250 | 54.378127 | 57.758072 |
| 170 | C  | 67.799459 | 51.408787 | 60.461417 | 192 | h | 72.984443 | 53.390165 | 56.265565 |
| 171 | C  | 63.190874 | 51.766279 | 58.543820 | 193 | h | 58.922496 | 49.607066 | 62.426982 |
| 172 | C  | 61.794799 | 51.561108 | 53.816824 | 194 | h | 66.879987 | 59.849204 | 61.064671 |
| 173 | C  | 60.443640 | 51.515879 | 54.164971 | 195 | h | 68.047430 | 46.376886 | 58.855646 |
| 174 | C  | 60.074505 | 51.498349 | 55.508682 | 196 |   |           |           |           |
| 175 | C  | 61.050313 | 51.512084 | 56.501258 | 197 |   |           |           |           |

198 **IMI**

|     |   |           |           |           |     |   |           |           |           |
|-----|---|-----------|-----------|-----------|-----|---|-----------|-----------|-----------|
| 199 | C | 73.236231 | 53.597891 | 57.318644 | 220 | N | 60.297226 | 47.269574 | 60.022197 |
| 200 | H | 73.547839 | 52.650841 | 57.773208 | 221 | H | 60.771764 | 46.435584 | 59.688960 |
| 201 | H | 74.070292 | 54.295828 | 57.447482 | 222 | H | 59.455641 | 47.101459 | 60.580259 |
| 202 | N | 72.073901 | 54.132392 | 58.021696 | 223 | C | 65.873619 | 59.608676 | 61.337879 |
| 203 | H | 71.907486 | 55.143685 | 58.034108 | 224 | H | 65.844910 | 59.483717 | 62.427930 |
| 204 | C | 71.085561 | 53.406243 | 58.538647 | 225 | H | 65.289130 | 60.515352 | 61.130387 |
| 205 | N | 69.891392 | 53.979030 | 58.708449 | 226 | C | 65.215790 | 58.400942 | 60.711159 |
| 206 | H | 69.143618 | 53.390079 | 59.059772 | 227 | C | 65.260907 | 57.166819 | 61.371643 |
| 207 | H | 69.635328 | 54.764235 | 58.089412 | 228 | H | 65.847534 | 57.070197 | 62.287761 |
| 208 | N | 71.267590 | 52.116656 | 58.852889 | 229 | C | 64.552315 | 56.066079 | 60.905325 |
| 209 | H | 70.433331 | 51.640484 | 59.194178 | 230 | H | 64.554748 | 55.112349 | 61.436742 |
| 210 | H | 72.136308 | 51.889209 | 59.371719 | 231 | C | 63.742937 | 56.193097 | 59.771918 |
| 211 | C | 59.101802 | 49.635646 | 61.142294 | 232 | O | 62.937864 | 55.185922 | 59.375072 |
| 212 | H | 58.467628 | 48.872958 | 60.673760 | 233 | H | 62.925792 | 54.491608 | 60.069336 |
| 213 | H | 58.686705 | 50.608128 | 60.845746 | 234 | C | 64.477397 | 58.482823 | 59.525157 |
| 214 | N | 60.449670 | 49.521498 | 60.616821 | 235 | H | 64.457737 | 59.426181 | 58.974985 |
| 215 | H | 61.116296 | 50.297893 | 60.723216 | 236 | C | 63.748483 | 57.392570 | 59.053497 |
| 216 | C | 60.979117 | 48.423884 | 60.077053 | 237 | H | 63.148548 | 57.463526 | 58.145047 |
| 217 | N | 62.202887 | 48.496252 | 59.561943 | 238 | C | 67.104519 | 46.844696 | 59.045837 |
| 218 | H | 62.691829 | 47.628170 | 59.275467 | 239 | H | 66.521353 | 46.799829 | 58.117377 |
| 219 | H | 62.715422 | 49.379610 | 59.681224 | 240 | H | 66.546974 | 46.356896 | 59.853036 |

|     |    |           |           |           |     |   |           |           |           |
|-----|----|-----------|-----------|-----------|-----|---|-----------|-----------|-----------|
| 241 | C  | 67.311651 | 48.281291 | 59.418423 | 263 | H | 64.196422 | 51.699976 | 54.470394 |
| 242 | O  | 67.192062 | 48.700739 | 60.563472 | 264 | O | 63.129526 | 53.069457 | 61.206181 |
| 243 | O  | 67.614130 | 49.069370 | 58.413665 | 265 | O | 62.856288 | 50.957481 | 60.528468 |
| 244 | H  | 67.826530 | 49.986900 | 58.697254 | 266 | H | 66.389750 | 52.436336 | 58.664167 |
| 245 | Zn | 67.401134 | 49.731544 | 62.461828 | 267 | H | 62.780754 | 53.031428 | 58.213856 |
| 246 | C  | 63.896658 | 51.552643 | 57.085607 | 268 | H | 62.406051 | 51.634659 | 52.700429 |
| 247 | C  | 62.797859 | 51.519864 | 56.068766 | 269 | H | 60.008852 | 51.476411 | 53.383693 |
| 248 | C  | 63.146286 | 51.538388 | 54.714932 | 270 | H | 59.407246 | 51.470581 | 55.793169 |
| 249 | C  | 63.408283 | 52.080266 | 60.516448 | 271 | H | 61.195196 | 51.517436 | 57.516861 |
| 250 | C  | 64.426336 | 52.312519 | 59.418001 | 272 | O | 65.222841 | 53.467545 | 55.521020 |
| 251 | C  | 65.772757 | 52.167142 | 59.520275 | 273 | H | 65.723364 | 52.755507 | 55.927702 |
| 252 | C  | 66.455592 | 51.548245 | 60.623071 | 274 | H | 64.377613 | 53.455921 | 57.550160 |
| 253 | C  | 67.996327 | 51.382599 | 60.487400 | 275 | h | 73.053850 | 53.451007 | 56.254112 |
| 254 | C  | 63.811968 | 52.680064 | 58.112257 | 276 | h | 59.052047 | 49.540026 | 62.226936 |
| 255 | C  | 62.139162 | 51.539632 | 53.754954 | 277 | h | 66.900895 | 59.887090 | 61.102810 |
| 256 | C  | 60.794898 | 51.493569 | 54.138027 | 278 | h | 68.040008 | 46.310285 | 58.880517 |
| 257 | C  | 60.452829 | 51.488302 | 55.488329 | 279 |   |           |           |           |
| 258 | C  | 61.457405 | 51.512827 | 56.456227 | 280 |   |           |           |           |
| 259 | O  | 65.948713 | 51.045452 | 61.629741 | 281 |   |           |           |           |
| 260 | O  | 68.489397 | 51.577925 | 59.369745 | 282 |   |           |           |           |
| 261 | O  | 68.602584 | 50.974777 | 61.503499 | 283 |   |           |           |           |
| 262 | O  | 64.807944 | 50.763591 | 57.059970 | 284 |   |           |           |           |

285 **SnB2**

286 **R**

|     |   |           |           |           |     |   |           |           |           |
|-----|---|-----------|-----------|-----------|-----|---|-----------|-----------|-----------|
| 287 | C | 72.957398 | 54.631626 | 57.638166 | 308 | N | 60.832385 | 47.044731 | 59.816650 |
| 288 | H | 73.191616 | 53.635321 | 58.028279 | 309 | H | 61.463177 | 46.325179 | 59.468202 |
| 289 | H | 73.738008 | 55.310537 | 58.001716 | 310 | H | 59.999933 | 46.709030 | 60.304138 |
| 290 | N | 71.665961 | 55.072667 | 58.154576 | 311 | C | 65.443289 | 60.404764 | 60.211815 |
| 291 | H | 71.423178 | 56.062508 | 58.041856 | 312 | H | 64.765022 | 61.016528 | 60.827870 |
| 292 | C | 70.685209 | 54.270634 | 58.588506 | 313 | H | 65.357552 | 60.776552 | 59.181872 |
| 293 | N | 69.431972 | 54.736015 | 58.589944 | 314 | C | 65.034170 | 58.945172 | 60.234846 |
| 294 | H | 68.705435 | 54.121108 | 58.955416 | 315 | C | 64.896823 | 58.206298 | 61.413873 |
| 295 | H | 69.176654 | 55.490403 | 57.940063 | 316 | H | 65.034315 | 58.711138 | 62.369696 |
| 296 | N | 70.925042 | 53.031147 | 58.997980 | 317 | C | 64.604263 | 56.843256 | 61.404126 |
| 297 | H | 70.100912 | 52.469409 | 59.241052 | 318 | H | 64.567585 | 56.292084 | 62.343425 |
| 298 | H | 71.831214 | 52.779557 | 59.428524 | 319 | C | 64.411763 | 56.174914 | 60.188266 |
| 299 | C | 59.353336 | 49.086047 | 61.241456 | 320 | O | 64.149960 | 54.862184 | 60.071657 |
| 300 | H | 58.819686 | 48.265073 | 60.747346 | 321 | H | 64.069611 | 54.258875 | 60.879517 |
| 301 | H | 58.770119 | 49.996241 | 61.048129 | 322 | C | 64.810099 | 58.269228 | 59.029203 |
| 302 | N | 60.675382 | 49.230340 | 60.655062 | 323 | H | 64.892811 | 58.817629 | 58.088718 |
| 303 | H | 61.268309 | 50.023856 | 60.958788 | 324 | C | 64.499230 | 56.915961 | 58.999463 |
| 304 | C | 61.362461 | 48.252209 | 60.069397 | 325 | H | 64.332977 | 56.411245 | 58.047542 |
| 305 | N | 62.618327 | 48.494520 | 59.705251 | 326 | C | 68.556849 | 47.914355 | 59.191022 |
| 306 | H | 63.159141 | 47.745609 | 59.234653 | 327 | H | 67.903231 | 47.306184 | 59.829167 |
| 307 | H | 63.030559 | 49.392745 | 59.948562 | 328 | H | 69.049879 | 48.655395 | 59.846467 |



|     |    |           |           |           |     |   |           |           |           |
|-----|----|-----------|-----------|-----------|-----|---|-----------|-----------|-----------|
| 329 | C  | 67.729472 | 48.756252 | 58.252480 | 351 | H | 63.864068 | 50.976980 | 54.834167 |
| 330 | O  | 68.128412 | 49.312605 | 57.261842 | 352 | O | 63.718417 | 52.950247 | 61.768421 |
| 331 | O  | 66.482646 | 48.929719 | 58.703426 | 353 | O | 62.618703 | 51.017323 | 61.527420 |
| 332 | H  | 66.013931 | 49.589584 | 58.148628 | 354 | H | 65.910806 | 52.029049 | 58.691075 |
| 333 | Zn | 67.659686 | 49.852726 | 62.475713 | 355 | H | 62.107041 | 51.509461 | 59.028869 |
| 334 | C  | 63.517683 | 50.986364 | 57.447142 | 356 | H | 62.157567 | 50.837834 | 53.003244 |
| 335 | C  | 62.417263 | 50.882526 | 56.410946 | 357 | H | 59.747750 | 50.669498 | 53.575144 |
| 336 | C  | 62.801910 | 50.887949 | 55.061042 | 358 | H | 59.044102 | 50.603775 | 55.969128 |
| 337 | C  | 63.429198 | 51.900673 | 61.167555 | 359 | H | 60.727689 | 50.741980 | 57.764441 |
| 338 | C  | 64.070743 | 51.677577 | 59.791406 | 360 | O | 63.133773 | 54.246902 | 57.656026 |
| 339 | C  | 65.480638 | 51.763310 | 59.653730 | 361 | H | 62.824314 | 53.346367 | 57.820122 |
| 340 | C  | 66.365251 | 51.367716 | 60.639812 | 362 | H | 63.563261 | 54.451733 | 58.521046 |
| 341 | C  | 67.869310 | 51.503308 | 60.344202 | 363 | h | 72.971649 | 54.606703 | 56.548559 |
| 342 | C  | 63.165054 | 51.442973 | 58.771941 | 364 | h | 59.407711 | 48.910689 | 62.315867 |
| 343 | C  | 61.847992 | 50.806579 | 54.048301 | 365 | h | 66.440491 | 60.701680 | 60.536614 |
| 344 | C  | 60.491558 | 50.712359 | 54.371037 | 366 | h | 69.350687 | 47.303891 | 58.760648 |
| 345 | C  | 60.099746 | 50.690120 | 55.709054 | 367 |   |           |           |           |
| 346 | C  | 61.054305 | 50.775539 | 56.724769 | 368 |   |           |           |           |
| 347 | O  | 66.074089 | 50.791607 | 61.745574 | 369 |   |           |           |           |
| 348 | O  | 68.259166 | 52.236093 | 59.445269 | 370 |   |           |           |           |
| 349 | O  | 68.639562 | 50.807821 | 61.098847 | 371 |   |           |           |           |
| 350 | O  | 64.657949 | 50.684008 | 57.100577 | 372 |   |           |           |           |

373 **SnB3**

374 **R**

|     |   |           |           |           |     |   |           |           |           |
|-----|---|-----------|-----------|-----------|-----|---|-----------|-----------|-----------|
| 375 | C | 73.091979 | 54.669065 | 58.022328 | 395 | H | 62.580923 | 49.731382 | 59.732008 |
| 376 | H | 73.360203 | 53.685321 | 58.422924 | 396 | N | 60.646555 | 47.203496 | 59.508613 |
| 377 | H | 73.848433 | 55.370640 | 58.388304 | 397 | H | 61.329387 | 46.579829 | 59.068182 |
| 378 | N | 71.783340 | 55.082259 | 58.536517 | 398 | H | 59.820905 | 46.796287 | 59.953704 |
| 379 | H | 71.593706 | 56.076059 | 58.682200 | 399 | C | 64.870495 | 58.910071 | 62.054398 |
| 380 | C | 70.734170 | 54.265664 | 58.648029 | 400 | H | 64.915866 | 58.401007 | 63.028536 |
| 381 | N | 69.509260 | 54.791415 | 58.719994 | 401 | H | 64.101329 | 59.688526 | 62.159513 |
| 382 | H | 68.737160 | 54.148569 | 58.883441 | 402 | C | 64.456459 | 57.882537 | 61.021764 |
| 383 | H | 69.338927 | 55.698769 | 58.263837 | 403 | C | 64.680229 | 56.525755 | 61.287517 |
| 384 | N | 70.884385 | 52.937203 | 58.641958 | 404 | H | 65.192364 | 56.248661 | 62.209245 |
| 385 | H | 70.006265 | 52.423956 | 58.770267 | 405 | C | 64.238963 | 55.519126 | 60.431827 |
| 386 | H | 71.640798 | 52.546350 | 59.231093 | 406 | H | 64.373263 | 54.469125 | 60.711512 |
| 387 | C | 59.101511 | 49.001250 | 61.171381 | 407 | C | 63.563564 | 55.875575 | 59.265219 |
| 388 | H | 58.549039 | 48.187002 | 60.690082 | 408 | O | 63.071990 | 54.925066 | 58.400538 |
| 389 | H | 58.419779 | 49.861169 | 61.215606 | 409 | H | 63.305946 | 54.026860 | 58.702669 |
| 390 | N | 60.249893 | 49.365393 | 60.345660 | 410 | C | 63.780951 | 58.210308 | 59.840826 |
| 391 | H | 60.816162 | 50.164074 | 60.675622 | 411 | H | 63.585595 | 59.256921 | 59.603425 |
| 392 | C | 61.032476 | 48.459976 | 59.720614 | 412 | C | 63.346957 | 57.220261 | 58.959608 |
| 393 | N | 62.214537 | 48.870859 | 59.276772 | 413 | H | 62.828649 | 57.483773 | 58.035153 |
| 394 | H | 62.810033 | 48.165884 | 58.831253 | 414 | C | 68.556511 | 48.074400 | 59.102089 |

|     |    |           |           |           |     |   |           |           |           |
|-----|----|-----------|-----------|-----------|-----|---|-----------|-----------|-----------|
| 415 | H  | 67.854810 | 47.441136 | 59.660296 | 437 | O | 68.750230 | 50.960903 | 61.002775 |
| 416 | H  | 69.032820 | 48.752465 | 59.833416 | 438 | O | 65.030927 | 51.203910 | 57.031945 |
| 417 | C  | 67.814138 | 49.016434 | 58.189300 | 439 | H | 64.770879 | 51.920864 | 54.792411 |
| 418 | O  | 68.288545 | 49.623234 | 57.265042 | 440 | O | 63.581494 | 52.625204 | 61.915377 |
| 419 | O  | 66.554049 | 49.213154 | 58.590024 | 441 | O | 62.422160 | 50.913581 | 61.048484 |
| 420 | H  | 66.144855 | 49.942192 | 58.072957 | 442 | H | 66.023199 | 52.257704 | 58.806385 |
| 421 | Zn | 67.880623 | 50.012623 | 62.442085 | 443 | H | 62.291154 | 51.940308 | 58.698493 |
| 422 | C  | 63.902514 | 51.645513 | 57.254348 | 444 | H | 63.491016 | 52.461759 | 52.700963 |
| 423 | C  | 63.038976 | 51.948728 | 56.051175 | 445 | H | 61.018230 | 52.683753 | 52.801005 |
| 424 | C  | 63.689114 | 52.054596 | 54.811825 | 446 | H | 59.841898 | 52.468221 | 54.986949 |
| 425 | C  | 63.329560 | 51.802986 | 61.046384 | 447 | H | 61.117996 | 52.034082 | 57.050178 |
| 426 | C  | 64.138249 | 51.852236 | 59.741097 | 448 | O | 63.411964 | 55.184738 | 55.560440 |
| 427 | C  | 65.547061 | 51.950187 | 59.732861 | 449 | H | 63.947933 | 54.404583 | 55.379451 |
| 428 | C  | 66.447251 | 51.528882 | 60.699679 | 450 | H | 63.204237 | 55.106308 | 56.507036 |
| 429 | C  | 67.931517 | 51.638063 | 60.289817 | 451 | h | 73.125022 | 54.641328 | 56.933197 |
| 430 | C  | 63.373331 | 51.879200 | 58.578007 | 452 | h | 59.377635 | 48.733886 | 62.191351 |
| 431 | C  | 62.970571 | 52.338154 | 53.652813 | 453 | h | 65.809256 | 59.456561 | 61.964168 |
| 432 | C  | 61.581828 | 52.476217 | 53.711093 | 454 | h | 69.365743 | 47.482042 | 58.675096 |
| 433 | C  | 60.925519 | 52.359633 | 54.935924 | 455 |   |           |           |           |
| 434 | C  | 61.650501 | 52.117254 | 56.102712 | 456 |   |           |           |           |
| 435 | O  | 66.228665 | 50.959952 | 61.816752 | 457 |   |           |           |           |
| 436 | O  | 68.244166 | 52.320451 | 59.323574 | 458 |   |           |           |           |

459 **TS1**

|     |   |           |           |           |     |   |           |           |           |
|-----|---|-----------|-----------|-----------|-----|---|-----------|-----------|-----------|
| 460 | C | 73.121327 | 54.723263 | 58.024991 | 481 | N | 60.676169 | 47.238798 | 59.458587 |
| 461 | H | 73.395936 | 53.738199 | 58.417516 | 482 | H | 61.357857 | 46.622392 | 59.003493 |
| 462 | H | 73.872299 | 55.427247 | 58.396895 | 483 | H | 59.857862 | 46.824302 | 59.911153 |
| 463 | N | 71.809302 | 55.122400 | 58.540956 | 484 | C | 64.794535 | 58.923515 | 61.894370 |
| 464 | H | 71.608442 | 56.114186 | 58.692526 | 485 | H | 64.777452 | 58.404275 | 62.863938 |
| 465 | C | 70.768509 | 54.295984 | 58.631689 | 486 | H | 64.039731 | 59.719938 | 61.971490 |
| 466 | N | 69.536952 | 54.804608 | 58.693723 | 487 | C | 64.414907 | 57.927386 | 60.818669 |
| 467 | H | 68.766678 | 54.160248 | 58.843602 | 488 | C | 64.567041 | 56.556431 | 61.065269 |
| 468 | H | 69.358716 | 55.717634 | 58.248727 | 489 | H | 64.999895 | 56.235532 | 62.016223 |
| 469 | N | 70.940838 | 52.967480 | 58.610024 | 490 | C | 64.155445 | 55.590698 | 60.154628 |
| 470 | H | 70.073918 | 52.435804 | 58.708127 | 491 | H | 64.237680 | 54.537895 | 60.428432 |
| 471 | H | 71.686319 | 52.582819 | 59.216873 | 492 | C | 63.572969 | 55.954260 | 58.920601 |
| 472 | C | 59.107222 | 49.044088 | 61.083724 | 493 | O | 63.146363 | 55.040001 | 58.056562 |
| 473 | H | 58.560497 | 48.237088 | 60.581227 | 494 | H | 63.368252 | 53.563903 | 58.404610 |
| 474 | H | 58.434062 | 49.911039 | 61.114609 | 495 | C | 63.833647 | 58.291551 | 59.598055 |
| 475 | N | 60.280074 | 49.395583 | 60.292418 | 496 | H | 63.677223 | 59.349283 | 59.375150 |
| 476 | H | 60.824211 | 50.213815 | 60.596286 | 497 | C | 63.440317 | 57.336994 | 58.660748 |
| 477 | C | 61.054825 | 48.500437 | 59.656039 | 498 | H | 62.997443 | 57.652945 | 57.712471 |
| 478 | N | 62.229063 | 48.918782 | 59.184532 | 499 | C | 68.610993 | 48.118499 | 59.118354 |
| 479 | H | 62.821052 | 48.198708 | 58.762382 | 500 | H | 67.892760 | 47.498977 | 59.671108 |
| 480 | H | 62.611424 | 49.761619 | 59.672612 | 501 | H | 69.107780 | 48.773564 | 59.856806 |

|     |    |           |           |           |     |   |           |           |           |
|-----|----|-----------|-----------|-----------|-----|---|-----------|-----------|-----------|
| 502 | C  | 67.887383 | 49.085949 | 58.218794 | 524 | H | 64.786910 | 51.983791 | 54.781581 |
| 503 | O  | 68.332403 | 49.633044 | 57.246285 | 525 | O | 63.613702 | 52.575370 | 61.978492 |
| 504 | O  | 66.665451 | 49.383579 | 58.692951 | 526 | O | 62.554089 | 50.899426 | 60.929798 |
| 505 | H  | 66.244038 | 50.074393 | 58.136438 | 527 | H | 66.077992 | 52.428495 | 58.809085 |
| 506 | Zn | 67.918487 | 50.012185 | 62.448755 | 528 | H | 62.373685 | 52.100295 | 58.727200 |
| 507 | C  | 63.907689 | 51.824065 | 57.258538 | 529 | H | 63.501187 | 52.445613 | 52.680391 |
| 508 | C  | 63.059700 | 52.094226 | 56.048278 | 530 | H | 61.034797 | 52.713820 | 52.787232 |
| 509 | C  | 63.706901 | 52.130805 | 54.804624 | 531 | H | 59.870211 | 52.628604 | 54.986513 |
| 510 | C  | 63.415544 | 51.827248 | 61.037330 | 532 | H | 61.155963 | 52.301983 | 57.064243 |
| 511 | C  | 64.228199 | 52.063389 | 59.764994 | 533 | O | 63.472537 | 55.282741 | 55.474669 |
| 512 | C  | 65.592804 | 52.106125 | 59.725926 | 534 | H | 64.141552 | 54.606273 | 55.336632 |
| 513 | C  | 66.500936 | 51.597982 | 60.698250 | 535 | H | 63.298615 | 55.238550 | 56.461250 |
| 514 | C  | 67.992239 | 51.630448 | 60.274985 | 536 | h | 73.153747 | 54.704022 | 56.935658 |
| 515 | C  | 63.427972 | 52.360704 | 58.566979 | 537 | h | 59.355637 | 48.765979 | 62.107937 |
| 516 | C  | 62.987968 | 52.380023 | 53.640549 | 538 | h | 65.744150 | 59.457834 | 61.866042 |
| 517 | C  | 61.601911 | 52.543006 | 53.702900 | 539 | h | 69.401709 | 47.508775 | 58.681236 |
| 518 | C  | 60.950985 | 52.498450 | 54.934662 | 540 |   |           |           |           |
| 519 | C  | 61.678714 | 52.303826 | 56.108316 | 541 |   |           |           |           |
| 520 | O  | 66.252878 | 51.038115 | 61.779697 | 542 |   |           |           |           |
| 521 | O  | 68.304979 | 52.268290 | 59.286552 | 543 |   |           |           |           |
| 522 | O  | 68.779535 | 50.946743 | 61.011430 | 544 |   |           |           |           |
| 523 | O  | 64.964681 | 51.234858 | 57.102453 | 545 |   |           |           |           |

546 **IMI**

|     |   |           |           |           |     |   |           |           |           |
|-----|---|-----------|-----------|-----------|-----|---|-----------|-----------|-----------|
| 547 | C | 73.141296 | 54.767538 | 58.027005 | 568 | N | 60.716125 | 47.191239 | 59.419709 |
| 548 | H | 73.431180 | 53.790884 | 58.429428 | 569 | H | 61.366462 | 46.553882 | 58.946118 |
| 549 | H | 73.883939 | 55.485223 | 58.388889 | 570 | H | 59.911721 | 46.795084 | 59.912153 |
| 550 | N | 71.825674 | 55.156704 | 58.542637 | 571 | C | 64.822927 | 58.923906 | 61.990778 |
| 551 | H | 71.618914 | 56.145732 | 58.706973 | 572 | H | 64.887934 | 58.330850 | 62.914749 |
| 552 | C | 70.791570 | 54.322211 | 58.627949 | 573 | H | 64.063954 | 59.694780 | 62.185928 |
| 553 | N | 69.555782 | 54.818442 | 58.693568 | 574 | C | 64.388275 | 57.994517 | 60.876277 |
| 554 | H | 68.791887 | 54.167717 | 58.846126 | 575 | C | 64.506646 | 56.612512 | 61.066153 |
| 555 | H | 69.366588 | 55.733728 | 58.256967 | 576 | H | 64.931888 | 56.244975 | 62.002808 |
| 556 | N | 70.976882 | 52.994475 | 58.594982 | 577 | C | 64.084338 | 55.690221 | 60.116333 |
| 557 | H | 70.114945 | 52.455182 | 58.690180 | 578 | H | 64.155203 | 54.627069 | 60.349138 |
| 558 | H | 71.718537 | 52.613987 | 59.208572 | 579 | C | 63.497206 | 56.107881 | 58.898254 |
| 559 | C | 59.233284 | 49.046550 | 61.062390 | 580 | O | 63.058556 | 55.237204 | 58.012364 |
| 560 | H | 58.674931 | 48.252615 | 60.551765 | 581 | H | 63.348853 | 53.598227 | 58.499952 |
| 561 | H | 58.590587 | 49.936950 | 61.060610 | 582 | C | 63.806515 | 58.418681 | 59.674787 |
| 562 | N | 60.445735 | 49.341367 | 60.314434 | 583 | H | 63.675210 | 59.489898 | 59.497326 |
| 563 | H | 61.032776 | 50.127512 | 60.631028 | 584 | C | 63.386598 | 57.507872 | 58.705197 |
| 564 | C | 61.155789 | 48.431178 | 59.636596 | 585 | H | 62.944598 | 57.870026 | 57.773023 |
| 565 | N | 62.333629 | 48.805344 | 59.130495 | 586 | C | 68.629012 | 48.099376 | 59.147620 |
| 566 | H | 62.886853 | 48.065421 | 58.691279 | 587 | H | 67.942996 | 47.475007 | 59.734719 |
| 567 | H | 62.763590 | 49.633796 | 59.582927 | 588 | H | 69.148719 | 48.761645 | 59.863841 |

|     |    |           |           |           |     |   |           |           |           |
|-----|----|-----------|-----------|-----------|-----|---|-----------|-----------|-----------|
| 589 | C  | 67.858247 | 49.058351 | 58.278788 | 611 | H | 64.911127 | 51.865216 | 54.919905 |
| 590 | O  | 68.248092 | 49.591439 | 57.275845 | 612 | O | 63.581827 | 52.489459 | 62.096851 |
| 591 | O  | 66.665272 | 49.370366 | 58.817213 | 613 | O | 62.726979 | 50.772157 | 60.929408 |
| 592 | H  | 66.212372 | 50.043864 | 58.264335 | 614 | H | 66.103953 | 52.580830 | 58.891562 |
| 593 | Zn | 67.951643 | 50.019451 | 62.455995 | 615 | H | 62.420054 | 52.116139 | 58.832789 |
| 594 | C  | 63.948758 | 51.888208 | 57.370216 | 616 | H | 63.721360 | 52.347451 | 52.764394 |
| 595 | C  | 63.185779 | 52.240512 | 56.132841 | 617 | H | 61.298482 | 52.902888 | 52.804036 |
| 596 | C  | 63.856459 | 52.136255 | 54.906262 | 618 | H | 60.100606 | 53.072359 | 54.975646 |
| 597 | C  | 63.480966 | 51.778259 | 61.113291 | 619 | H | 61.319670 | 52.760910 | 57.100643 |
| 598 | C  | 64.277150 | 52.155076 | 59.869246 | 620 | O | 63.374708 | 55.383664 | 55.449715 |
| 599 | C  | 65.633927 | 52.226408 | 59.805958 | 621 | H | 63.963399 | 54.636250 | 55.318939 |
| 600 | C  | 66.554582 | 51.669557 | 60.746657 | 622 | H | 63.216366 | 55.385068 | 56.444452 |
| 601 | C  | 68.034511 | 51.645815 | 60.285606 | 623 | h | 73.170144 | 54.737054 | 56.937828 |
| 602 | C  | 63.452859 | 52.461418 | 58.671829 | 624 | h | 59.432933 | 48.770377 | 62.097733 |
| 603 | C  | 63.190222 | 52.400947 | 53.714604 | 625 | h | 65.764596 | 59.469282 | 61.928398 |
| 604 | C  | 61.829877 | 52.719529 | 53.738543 | 626 | h | 69.408454 | 47.496227 | 58.682058 |
| 605 | C  | 61.160326 | 52.824231 | 54.956056 | 627 |   |           |           |           |
| 606 | C  | 61.842107 | 52.622262 | 56.154647 | 628 |   |           |           |           |
| 607 | O  | 66.307761 | 51.113541 | 61.825915 | 629 |   |           |           |           |
| 608 | O  | 68.345235 | 52.276651 | 59.292775 | 630 |   |           |           |           |
| 609 | O  | 68.809752 | 50.927333 | 61.000171 | 631 |   |           |           |           |
| 610 | O  | 64.921407 | 51.162790 | 57.269889 | 632 |   |           |           |           |

## 633 IM1'

|     |   |           |           |           |     |   |           |           |           |
|-----|---|-----------|-----------|-----------|-----|---|-----------|-----------|-----------|
| 634 | C | 73.197705 | 54.817536 | 58.031765 | 655 | N | 60.856100 | 46.805957 | 59.137034 |
| 635 | H | 73.507113 | 53.848861 | 58.438469 | 656 | H | 61.370532 | 46.107376 | 58.584682 |
| 636 | H | 73.931915 | 55.548935 | 58.382371 | 657 | H | 60.117903 | 46.469843 | 59.761995 |
| 637 | N | 71.878077 | 55.187988 | 58.552785 | 658 | C | 64.880537 | 58.977139 | 62.063660 |
| 638 | H | 71.657123 | 56.173228 | 58.725877 | 659 | H | 64.802050 | 58.725326 | 63.131258 |
| 639 | C | 70.855483 | 54.338655 | 58.608706 | 660 | H | 64.130993 | 59.764695 | 61.899413 |
| 640 | N | 69.609958 | 54.814192 | 58.673819 | 661 | C | 64.506881 | 57.734550 | 61.284997 |
| 641 | H | 68.859338 | 54.139426 | 58.774721 | 662 | C | 64.554914 | 56.500610 | 61.941195 |
| 642 | H | 69.409979 | 55.725688 | 58.232243 | 663 | H | 64.996204 | 56.447294 | 62.938691 |
| 643 | N | 71.066346 | 53.015921 | 58.544565 | 664 | C | 63.976718 | 55.363474 | 61.383316 |
| 644 | H | 70.217726 | 52.454063 | 58.617015 | 665 | H | 63.949191 | 54.412357 | 61.920547 |
| 645 | H | 71.805095 | 52.639605 | 59.163050 | 666 | C | 63.324465 | 55.457552 | 60.152477 |
| 646 | C | 59.704387 | 48.889335 | 60.783582 | 667 | O | 62.575238 | 54.434528 | 59.680222 |
| 647 | H | 59.093463 | 48.146060 | 60.258737 | 668 | H | 62.559418 | 53.709946 | 60.338626 |
| 648 | H | 59.253685 | 49.871693 | 60.583276 | 669 | C | 63.976583 | 57.766369 | 59.985771 |
| 649 | N | 61.050892 | 48.855179 | 60.246895 | 670 | H | 63.973904 | 58.706018 | 59.432334 |
| 650 | H | 61.755217 | 49.546807 | 60.543755 | 671 | C | 63.409935 | 56.634708 | 59.400643 |
| 651 | C | 61.522049 | 47.933446 | 59.411800 | 672 | H | 63.028261 | 56.626249 | 58.375061 |
| 652 | N | 62.693553 | 48.150279 | 58.805909 | 673 | C | 68.596545 | 48.008023 | 59.109466 |
| 653 | H | 63.090938 | 47.368758 | 58.285301 | 674 | H | 67.863310 | 47.379876 | 59.632101 |
| 654 | H | 63.272018 | 48.926157 | 59.146331 | 675 | H | 69.079681 | 48.644577 | 59.872502 |



|     |    |           |           |           |     |   |           |           |           |
|-----|----|-----------|-----------|-----------|-----|---|-----------|-----------|-----------|
| 676 | C  | 67.901362 | 48.992660 | 58.204255 | 698 | H | 65.086663 | 51.678255 | 54.398850 |
| 677 | O  | 68.367571 | 49.529183 | 57.236911 | 699 | O | 62.917895 | 52.156119 | 61.254645 |
| 678 | O  | 66.679555 | 49.320328 | 58.662884 | 700 | O | 63.482397 | 50.123760 | 60.527696 |
| 679 | H  | 66.275510 | 49.989070 | 58.065485 | 701 | H | 66.263766 | 52.610860 | 58.666914 |
| 680 | Zn | 67.918304 | 50.029541 | 62.400464 | 702 | H | 62.597313 | 51.897797 | 58.307457 |
| 681 | C  | 64.187040 | 51.777134 | 56.896676 | 703 | H | 63.806487 | 52.096864 | 52.280123 |
| 682 | C  | 63.428241 | 52.137636 | 55.672362 | 704 | H | 61.423014 | 52.773838 | 52.407472 |
| 683 | C  | 64.040687 | 51.970904 | 54.420480 | 705 | H | 60.364869 | 53.158250 | 54.622630 |
| 684 | C  | 63.554487 | 51.373848 | 60.540996 | 706 | H | 61.645415 | 52.861483 | 56.684129 |
| 685 | C  | 64.402331 | 51.981342 | 59.444311 | 707 | O | 62.958986 | 55.317331 | 55.812870 |
| 686 | C  | 65.738251 | 52.181756 | 59.516799 | 708 | H | 63.718531 | 54.729691 | 55.766801 |
| 687 | C  | 66.594069 | 51.624669 | 60.531722 | 709 | H | 63.478987 | 53.381406 | 58.078974 |
| 688 | C  | 68.099010 | 51.586748 | 60.171701 | 710 | h | 73.215945 | 54.779854 | 56.942585 |
| 689 | C  | 63.620202 | 52.292265 | 58.204391 | 711 | h | 59.663523 | 48.695476 | 61.855410 |
| 690 | C  | 63.331434 | 52.212685 | 53.252378 | 712 | h | 65.837902 | 59.488270 | 61.962348 |
| 691 | C  | 61.990070 | 52.606175 | 53.323681 | 713 | h | 69.396921 | 47.407554 | 58.677145 |
| 692 | C  | 61.396771 | 52.824105 | 54.558621 | 714 |   |           |           |           |
| 693 | C  | 62.122409 | 52.636481 | 55.732982 | 715 |   |           |           |           |
| 694 | O  | 66.272388 | 51.115234 | 61.611359 | 716 |   |           |           |           |
| 695 | O  | 68.466897 | 52.205416 | 59.192888 | 717 |   |           |           |           |
| 696 | O  | 68.825141 | 50.887286 | 60.952861 | 718 |   |           |           |           |
| 697 | O  | 65.195779 | 51.098125 | 56.847598 | 719 |   |           |           |           |

720 **TS2**

|     |   |           |           |           |     |   |           |           |           |
|-----|---|-----------|-----------|-----------|-----|---|-----------|-----------|-----------|
| 721 | C | 73.166220 | 54.769684 | 58.034844 | 742 | N | 60.794314 | 47.244009 | 59.401214 |
| 722 | H | 73.453268 | 53.791099 | 58.434903 | 743 | H | 61.431705 | 46.621322 | 58.885694 |
| 723 | H | 73.916814 | 55.482336 | 58.390519 | 744 | H | 60.033496 | 46.817633 | 59.936157 |
| 724 | N | 71.858254 | 55.166969 | 58.562625 | 745 | C | 64.890858 | 58.936004 | 62.171651 |
| 725 | H | 71.658157 | 56.156467 | 58.729870 | 746 | H | 65.002929 | 58.285519 | 63.051848 |
| 726 | C | 70.816194 | 54.342809 | 58.649778 | 747 | H | 64.149661 | 59.700863 | 62.440748 |
| 727 | N | 69.587225 | 54.854140 | 58.732568 | 748 | C | 64.410629 | 58.106661 | 61.003665 |
| 728 | H | 68.820533 | 54.203739 | 58.872012 | 749 | C | 64.664696 | 56.730387 | 60.976577 |
| 729 | H | 69.402372 | 55.767857 | 58.289037 | 750 | H | 65.178838 | 56.272487 | 61.824091 |
| 730 | N | 70.985224 | 53.013622 | 58.604660 | 751 | C | 64.279941 | 55.933615 | 59.904398 |
| 731 | H | 70.118163 | 52.483465 | 58.702488 | 752 | H | 64.477420 | 54.861839 | 59.933741 |
| 732 | H | 71.727385 | 52.618869 | 59.208216 | 753 | C | 63.616890 | 56.491057 | 58.794624 |
| 733 | C | 59.350096 | 49.082145 | 61.102029 | 754 | O | 63.267738 | 55.752267 | 57.738830 |
| 734 | H | 58.813408 | 48.298574 | 60.554692 | 755 | H | 63.054995 | 53.528842 | 58.804672 |
| 735 | H | 58.742440 | 49.994431 | 61.033149 | 756 | C | 63.712607 | 58.653176 | 59.921012 |
| 736 | N | 60.635794 | 49.318695 | 60.474976 | 757 | H | 63.487248 | 59.722689 | 59.916278 |
| 737 | H | 61.233092 | 50.091670 | 60.810722 | 758 | C | 63.335900 | 57.868480 | 58.834342 |
| 738 | C | 61.288617 | 48.448835 | 59.708765 | 759 | H | 62.841893 | 58.314195 | 57.969321 |
| 739 | N | 62.470467 | 48.816529 | 59.202926 | 760 | C | 68.533571 | 48.163663 | 59.135515 |
| 740 | H | 63.002316 | 48.100346 | 58.708668 | 761 | H | 67.813774 | 47.530064 | 59.671237 |
| 741 | H | 62.923023 | 49.623084 | 59.661673 | 762 | H | 69.028096 | 48.794025 | 59.896538 |

|     |    |           |           |           |     |   |           |           |           |
|-----|----|-----------|-----------|-----------|-----|---|-----------|-----------|-----------|
| 763 | C  | 67.807579 | 49.163133 | 58.265255 | 785 | H | 65.125188 | 52.440061 | 55.017173 |
| 764 | O  | 68.228690 | 49.668666 | 57.260384 | 786 | O | 63.568292 | 52.588081 | 62.200065 |
| 765 | O  | 66.632297 | 49.532132 | 58.801811 | 787 | O | 62.863428 | 50.772521 | 61.078913 |
| 766 | H  | 66.187104 | 50.220113 | 58.245453 | 788 | H | 66.119739 | 52.626329 | 58.985805 |
| 767 | Zn | 67.966130 | 50.036415 | 62.478844 | 789 | H | 62.584483 | 51.820493 | 58.851342 |
| 768 | C  | 64.147139 | 52.249890 | 57.437222 | 790 | H | 63.925047 | 52.749167 | 52.831779 |
| 769 | C  | 63.344000 | 52.551448 | 56.187712 | 791 | H | 61.441783 | 52.965310 | 52.813501 |
| 770 | C  | 64.043902 | 52.561993 | 54.974753 | 792 | H | 60.192625 | 52.971750 | 54.969321 |
| 771 | C  | 63.527030 | 51.843165 | 61.235872 | 793 | H | 61.396487 | 52.738569 | 57.111537 |
| 772 | C  | 64.300927 | 52.242718 | 59.986016 | 794 | O | 64.964129 | 54.083792 | 57.357293 |
| 773 | C  | 65.653528 | 52.327831 | 59.918536 | 795 | H | 65.672180 | 54.248525 | 57.989599 |
| 774 | C  | 66.577326 | 51.746232 | 60.841694 | 796 | H | 64.092489 | 54.933408 | 57.539095 |
| 775 | C  | 68.047192 | 51.702407 | 60.349041 | 797 | h | 73.185780 | 54.738511 | 56.945481 |
| 776 | C  | 63.451159 | 52.499239 | 58.778140 | 798 | h | 59.450482 | 48.804466 | 62.151259 |
| 777 | C  | 63.371752 | 52.733621 | 53.771229 | 799 | h | 65.826244 | 59.485542 | 62.066166 |
| 778 | C  | 61.976972 | 52.871415 | 53.760981 | 800 | h | 69.328197 | 47.566981 | 58.687623 |
| 779 | C  | 61.278034 | 52.872605 | 54.966459 | 801 |   |           |           |           |
| 780 | C  | 61.961741 | 52.727957 | 56.179305 | 802 |   |           |           |           |
| 781 | O  | 66.338023 | 51.185709 | 61.918829 | 803 |   |           |           |           |
| 782 | O  | 68.350616 | 52.352844 | 59.367410 | 804 |   |           |           |           |
| 783 | O  | 68.823108 | 50.956381 | 61.033980 | 805 |   |           |           |           |
| 784 | O  | 65.028871 | 51.393312 | 57.332624 | 806 |   |           |           |           |

807 **IM2**

|     |   |           |           |           |     |   |           |           |           |
|-----|---|-----------|-----------|-----------|-----|---|-----------|-----------|-----------|
| 808 | C | 73.178425 | 54.780126 | 58.035219 | 829 | N | 60.794490 | 47.241053 | 59.409642 |
| 809 | H | 73.470774 | 53.804886 | 58.439610 | 830 | H | 61.426858 | 46.618647 | 58.887002 |
| 810 | H | 73.926755 | 55.497735 | 58.385724 | 831 | H | 60.037470 | 46.816117 | 59.950493 |
| 811 | N | 71.869755 | 55.175080 | 58.562165 | 832 | C | 64.874563 | 58.888471 | 62.081701 |
| 812 | H | 71.669130 | 56.163471 | 58.734311 | 833 | H | 64.962793 | 58.232959 | 62.961002 |
| 813 | C | 70.829073 | 54.347439 | 58.645030 | 834 | H | 64.112111 | 59.640198 | 62.327541 |
| 814 | N | 69.598563 | 54.857302 | 58.722693 | 835 | C | 64.453764 | 58.065109 | 60.883348 |
| 815 | H | 68.831664 | 54.209614 | 58.877277 | 836 | C | 64.813086 | 56.713304 | 60.802020 |
| 816 | H | 69.414624 | 55.771860 | 58.283765 | 837 | H | 65.356416 | 56.258811 | 61.632114 |
| 817 | N | 71.002732 | 53.020319 | 58.596412 | 838 | C | 64.512634 | 55.938817 | 59.686447 |
| 818 | H | 70.137384 | 52.486855 | 58.699378 | 839 | H | 64.823321 | 54.893521 | 59.636077 |
| 819 | H | 71.747091 | 52.626269 | 59.197950 | 840 | C | 63.817421 | 56.508716 | 58.615974 |
| 820 | C | 59.349514 | 49.085985 | 61.096164 | 841 | O | 63.512883 | 55.794473 | 57.496977 |
| 821 | H | 58.813435 | 48.303738 | 60.545861 | 842 | H | 63.075172 | 53.482269 | 58.782011 |
| 822 | H | 58.744206 | 49.999884 | 61.023398 | 843 | C | 63.724622 | 58.607519 | 59.820542 |
| 823 | N | 60.638732 | 49.318832 | 60.476532 | 844 | H | 63.430054 | 59.658802 | 59.858518 |
| 824 | H | 61.231591 | 50.102208 | 60.797502 | 845 | C | 63.413612 | 57.844412 | 58.696588 |
| 825 | C | 61.290241 | 48.448300 | 59.708638 | 846 | H | 62.888035 | 58.290220 | 57.850502 |
| 826 | N | 62.466913 | 48.815199 | 59.195954 | 847 | C | 68.398603 | 48.228235 | 59.073694 |
| 827 | H | 62.995013 | 48.112494 | 58.680521 | 848 | H | 67.649367 | 47.586394 | 59.557629 |
| 828 | H | 62.914877 | 49.640835 | 59.625124 | 849 | H | 68.861496 | 48.833411 | 59.874762 |

|     |    |           |           |           |     |   |           |           |           |
|-----|----|-----------|-----------|-----------|-----|---|-----------|-----------|-----------|
| 850 | C  | 67.716034 | 49.265458 | 58.192331 | 872 | H | 65.021344 | 52.207455 | 54.831956 |
| 851 | O  | 68.225280 | 49.778661 | 57.227146 | 873 | O | 63.603111 | 52.607978 | 62.131561 |
| 852 | O  | 66.527833 | 49.630701 | 58.662282 | 874 | O | 62.845499 | 50.814315 | 61.012156 |
| 853 | H  | 66.042385 | 50.347643 | 58.097926 | 875 | H | 66.185217 | 52.655683 | 58.986143 |
| 854 | Zn | 67.982508 | 50.015138 | 62.463419 | 876 | H | 62.722537 | 51.750030 | 58.717577 |
| 855 | C  | 64.325639 | 52.357435 | 57.367073 | 877 | H | 63.658754 | 52.407173 | 52.743851 |
| 856 | C  | 63.360276 | 52.475154 | 56.150976 | 878 | H | 61.181846 | 52.684659 | 52.903673 |
| 857 | C  | 63.946553 | 52.385744 | 54.880210 | 879 | H | 60.117206 | 52.845986 | 55.154695 |
| 858 | C  | 63.549689 | 51.858122 | 61.169339 | 880 | H | 61.483221 | 52.740867 | 57.194470 |
| 859 | C  | 64.359568 | 52.233884 | 59.935447 | 881 | O | 65.079865 | 53.656478 | 57.325584 |
| 860 | C  | 65.711541 | 52.323782 | 59.901533 | 882 | H | 65.864018 | 53.461919 | 56.792292 |
| 861 | C  | 66.615565 | 51.727391 | 60.827676 | 883 | H | 64.117716 | 55.010717 | 57.410243 |
| 862 | C  | 68.095880 | 51.715283 | 60.368958 | 884 | h | 73.195229 | 54.743669 | 56.945974 |
| 863 | C  | 63.544388 | 52.483676 | 58.704024 | 885 | h | 59.438408 | 48.807741 | 62.146280 |
| 864 | C  | 63.181353 | 52.484057 | 53.722431 | 886 | h | 65.806051 | 59.450859 | 62.017535 |
| 865 | C  | 61.792552 | 52.650204 | 53.809523 | 887 | h | 69.215717 | 47.637851 | 58.659161 |
| 866 | C  | 61.198811 | 52.734017 | 55.068230 | 888 |   |           |           |           |
| 867 | C  | 61.978702 | 52.659434 | 56.227326 | 889 |   |           |           |           |
| 868 | O  | 66.357403 | 51.140367 | 61.888037 | 890 |   |           |           |           |
| 869 | O  | 68.407926 | 52.380260 | 59.399419 | 891 |   |           |           |           |
| 870 | O  | 68.872405 | 50.985168 | 61.069439 | 892 |   |           |           |           |
| 871 | O  | 65.135242 | 51.339694 | 57.241890 | 893 |   |           |           |           |

## 894 TS3

|     |   |           |           |           |     |   |           |           |           |
|-----|---|-----------|-----------|-----------|-----|---|-----------|-----------|-----------|
| 895 | C | 73.017477 | 54.568170 | 58.018870 | 916 | N | 60.849781 | 47.247387 | 59.420880 |
| 896 | H | 73.223316 | 53.551114 | 58.370366 | 917 | H | 61.478499 | 46.619604 | 58.898031 |
| 897 | H | 73.801187 | 55.210196 | 58.435323 | 918 | H | 60.097945 | 46.830265 | 59.972816 |
| 898 | N | 71.722691 | 55.020868 | 58.533335 | 919 | C | 64.862213 | 58.902657 | 61.905079 |
| 899 | H | 71.564477 | 56.023932 | 58.647643 | 920 | H | 64.894575 | 58.227693 | 62.773663 |
| 900 | C | 70.646576 | 54.251431 | 58.700919 | 921 | H | 64.079708 | 59.644393 | 62.114724 |
| 901 | N | 69.447306 | 54.833816 | 58.777285 | 922 | C | 64.547675 | 58.097810 | 60.661340 |
| 902 | H | 68.652137 | 54.233643 | 58.984135 | 923 | C | 65.132021 | 56.833815 | 60.506031 |
| 903 | H | 69.302346 | 55.732291 | 58.292913 | 924 | H | 65.752099 | 56.439276 | 61.311672 |
| 904 | N | 70.727062 | 52.917628 | 58.758316 | 925 | C | 64.975412 | 56.100823 | 59.341006 |
| 905 | H | 69.827614 | 52.446794 | 58.886939 | 926 | H | 65.473815 | 55.142544 | 59.207346 |
| 906 | H | 71.479793 | 52.497467 | 59.333185 | 927 | C | 64.142162 | 56.569817 | 58.327828 |
| 907 | C | 59.396848 | 49.081177 | 61.083428 | 928 | O | 63.908451 | 55.805155 | 57.213090 |
| 908 | H | 58.848201 | 48.301939 | 60.539498 | 929 | H | 63.610217 | 54.175424 | 59.095892 |
| 909 | H | 58.774343 | 49.985946 | 61.061326 | 930 | C | 63.736575 | 58.567321 | 59.624536 |
| 910 | N | 60.652556 | 49.356886 | 60.415029 | 931 | H | 63.287436 | 59.559514 | 59.711844 |
| 911 | H | 61.268820 | 50.122009 | 60.774443 | 932 | C | 63.519297 | 57.809254 | 58.469204 |
| 912 | C | 61.322788 | 48.477295 | 59.673273 | 933 | H | 62.890657 | 58.185827 | 57.660902 |
| 913 | N | 62.485120 | 48.844319 | 59.133363 | 934 | C | 68.534879 | 48.246814 | 59.200254 |
| 914 | H | 63.009321 | 48.146926 | 58.611978 | 935 | H | 67.927760 | 47.589144 | 59.835480 |
| 915 | H | 62.922601 | 49.739406 | 59.394765 | 936 | H | 69.083326 | 48.914999 | 59.889120 |

|     |    |           |           |           |     |   |           |           |           |
|-----|----|-----------|-----------|-----------|-----|---|-----------|-----------|-----------|
| 937 | C  | 67.632070 | 49.204465 | 58.456949 | 958 | O | 64.450981 | 50.998735 | 58.300277 |
| 938 | O  | 67.890720 | 49.781384 | 57.431530 | 959 | H | 64.465803 | 53.128283 | 55.489726 |
| 939 | O  | 66.515668 | 49.442927 | 59.146710 | 960 | O | 63.222362 | 52.270649 | 62.712502 |
| 940 | H  | 65.902226 | 50.100678 | 58.715166 | 961 | O | 62.709855 | 50.868424 | 61.036642 |
| 941 | Zn | 67.843892 | 50.036641 | 62.493456 | 962 | H | 65.943278 | 53.487402 | 59.907565 |
| 942 | C  | 64.157834 | 52.183238 | 58.008042 | 963 | H | 62.279657 | 53.018037 | 59.560618 |
| 943 | C  | 63.072183 | 52.412604 | 56.960208 | 964 | H | 62.768071 | 53.289556 | 53.676102 |
| 944 | C  | 63.424324 | 52.873803 | 55.687432 | 965 | H | 60.380265 | 52.746400 | 54.152863 |
| 945 | C  | 63.298974 | 51.853437 | 61.563697 | 966 | H | 59.740143 | 51.919463 | 56.414171 |
| 946 | C  | 64.095385 | 52.708730 | 60.600184 | 967 | H | 61.471060 | 51.650820 | 58.181289 |
| 947 | C  | 65.483957 | 52.845889 | 60.646947 | 968 | O | 65.225959 | 53.044702 | 57.734098 |
| 948 | C  | 66.384716 | 51.948502 | 61.217684 | 969 | H | 66.026994 | 52.652132 | 58.122818 |
| 949 | C  | 67.752769 | 51.853641 | 60.496262 | 970 | H | 64.402837 | 54.968681 | 57.290336 |
| 950 | C  | 63.353223 | 53.203822 | 59.505588 | 971 | h | 73.073082 | 54.596910 | 56.930684 |
| 951 | C  | 62.463848 | 52.977855 | 54.677578 | 972 | h | 59.532889 | 48.785345 | 62.123641 |
| 952 | C  | 61.133911 | 52.654225 | 54.935626 | 973 | h | 65.795054 | 59.466345 | 61.916482 |
| 953 | C  | 60.775430 | 52.192707 | 56.206745 | 974 | h | 69.297864 | 47.676210 | 58.670792 |
| 954 | C  | 61.740581 | 52.053451 | 57.203869 | 975 |   |           |           |           |
| 955 | O  | 66.215442 | 51.149917 | 62.179073 | 976 |   |           |           |           |
| 956 | O  | 67.942191 | 52.489820 | 59.459924 | 977 |   |           |           |           |
| 957 | O  | 68.594797 | 51.050712 | 61.016787 | 978 |   |           |           |           |
|     |    |           |           |           | 979 |   |           |           |           |

980 P

|      |   |           |           |           |      |   |           |           |           |
|------|---|-----------|-----------|-----------|------|---|-----------|-----------|-----------|
| 981  | C | 72.957531 | 54.466893 | 58.039184 | 1002 | N | 60.767477 | 47.304465 | 59.472343 |
| 982  | H | 73.151238 | 53.441139 | 58.372103 | 1003 | H | 61.460427 | 46.716715 | 58.990478 |
| 983  | H | 73.739594 | 55.095021 | 58.479894 | 1004 | H | 60.003713 | 46.846210 | 59.974462 |
| 984  | N | 71.657915 | 54.918016 | 58.548811 | 1005 | C | 64.878724 | 58.840178 | 61.850005 |
| 985  | H | 71.502743 | 55.922925 | 58.645946 | 1006 | H | 64.918552 | 58.152757 | 62.708731 |
| 986  | C | 70.577251 | 54.155379 | 58.729445 | 1007 | H | 64.085605 | 59.568011 | 62.069303 |
| 987  | N | 69.378046 | 54.744050 | 58.791420 | 1008 | C | 64.565660 | 58.044940 | 60.597532 |
| 988  | H | 68.578127 | 54.138968 | 58.972230 | 1009 | C | 65.142980 | 56.779508 | 60.421354 |
| 989  | H | 69.242350 | 55.637801 | 58.296369 | 1010 | H | 65.778064 | 56.372955 | 61.209529 |
| 990  | N | 70.645153 | 52.823733 | 58.815442 | 1011 | C | 64.947391 | 56.045987 | 59.259905 |
| 991  | H | 69.743297 | 52.349314 | 58.912693 | 1012 | H | 65.430640 | 55.078256 | 59.130029 |
| 992  | H | 71.396187 | 52.400993 | 59.391599 | 1013 | C | 64.100403 | 56.531645 | 58.267543 |
| 993  | C | 59.201851 | 49.045209 | 61.184524 | 1014 | O | 63.826795 | 55.787232 | 57.141859 |
| 994  | H | 58.675468 | 48.241069 | 60.655403 | 1015 | H | 63.456860 | 53.960231 | 58.859184 |
| 995  | H | 58.532678 | 49.916597 | 61.193075 | 1016 | C | 63.733584 | 58.523667 | 59.581624 |
| 996  | N | 60.415146 | 49.396434 | 60.473266 | 1017 | H | 63.287722 | 59.515764 | 59.685159 |
| 997  | H | 60.991005 | 50.183682 | 60.846425 | 1018 | C | 63.489923 | 57.774517 | 58.427259 |
| 998  | C | 61.160147 | 48.551964 | 59.761172 | 1019 | H | 62.848761 | 58.159132 | 57.632755 |
| 999  | N | 62.328186 | 48.998956 | 59.286937 | 1020 | C | 68.825508 | 48.140886 | 59.203802 |
| 1000 | H | 62.935713 | 48.314330 | 58.839224 | 1021 | H | 68.234180 | 47.504901 | 59.872241 |
| 1001 | H | 62.710000 | 49.831779 | 59.781523 | 1022 | H | 69.397937 | 48.825170 | 59.854934 |



|      |    |           |           |           |      |   |           |           |           |
|------|----|-----------|-----------|-----------|------|---|-----------|-----------|-----------|
| 1023 | C  | 67.913496 | 49.063423 | 58.443435 | 1045 | H | 65.069082 | 53.063576 | 54.845072 |
| 1024 | O  | 68.194796 | 49.717730 | 57.469561 | 1046 | O | 63.051269 | 52.383982 | 62.743822 |
| 1025 | O  | 66.730193 | 49.174603 | 59.050076 | 1047 | O | 62.482166 | 50.844453 | 61.227724 |
| 1026 | H  | 66.164985 | 49.841446 | 58.596945 | 1048 | H | 65.614692 | 53.234968 | 59.579989 |
| 1027 | Zn | 67.710130 | 50.133255 | 62.423285 | 1049 | H | 61.940434 | 53.345915 | 59.749964 |
| 1028 | C  | 64.881665 | 51.872013 | 57.290852 | 1050 | H | 63.199715 | 53.474115 | 53.238158 |
| 1029 | C  | 63.769814 | 52.254321 | 56.363645 | 1051 | H | 60.851345 | 53.000323 | 53.927990 |
| 1030 | C  | 64.038428 | 52.837885 | 55.123883 | 1052 | H | 60.380925 | 52.042329 | 56.168542 |
| 1031 | C  | 63.070482 | 51.903054 | 61.621463 | 1053 | H | 62.282121 | 51.492329 | 57.714870 |
| 1032 | C  | 63.794449 | 52.672805 | 60.533846 | 1054 | O | 65.817570 | 52.785468 | 57.399501 |
| 1033 | C  | 65.234983 | 52.635188 | 60.395539 | 1055 | H | 66.538325 | 52.521094 | 58.069313 |
| 1034 | C  | 66.170685 | 51.840523 | 60.987759 | 1056 | H | 64.341049 | 54.964548 | 57.163623 |
| 1035 | C  | 67.529197 | 51.798004 | 60.297850 | 1057 | h | 73.029864 | 54.519081 | 56.952855 |
| 1036 | C  | 63.028567 | 53.358439 | 59.661304 | 1058 | h | 59.400737 | 48.755524 | 62.216315 |
| 1037 | C  | 62.987466 | 53.084378 | 54.236520 | 1059 | h | 65.802961 | 59.417423 | 61.875325 |
| 1038 | C  | 61.674078 | 52.806566 | 54.616717 | 1060 | h | 69.559190 | 47.544222 | 58.661798 |
| 1039 | C  | 61.409388 | 52.256030 | 55.874641 | 1061 |   |           |           |           |
| 1040 | C  | 62.456619 | 51.957155 | 56.742385 | 1062 |   |           |           |           |
| 1041 | O  | 66.055264 | 51.076519 | 62.030804 | 1063 |   |           |           |           |
| 1042 | O  | 67.714276 | 52.381089 | 59.200791 | 1064 |   |           |           |           |
| 1043 | O  | 68.435589 | 51.108203 | 60.860515 | 1065 |   |           |           |           |
| 1044 | O  | 64.893587 | 50.800973 | 57.853257 | 1066 |   |           |           |           |

1067 **SnA1**

1068 **R**

|      |   |           |           |           |      |   |           |           |           |
|------|---|-----------|-----------|-----------|------|---|-----------|-----------|-----------|
| 1069 | C | 75.099334 | 55.340179 | 60.533749 | 1089 | H | 65.901607 | 47.079996 | 60.366169 |
| 1070 | H | 75.590024 | 54.407301 | 60.842652 | 1090 | N | 63.644920 | 45.956483 | 60.581152 |
| 1071 | H | 75.854760 | 56.125279 | 60.653600 | 1091 | H | 64.134080 | 45.632329 | 59.732914 |
| 1072 | N | 74.011745 | 55.636160 | 61.447456 | 1092 | H | 62.732280 | 45.563000 | 60.773483 |
| 1073 | H | 73.813893 | 56.607917 | 61.674942 | 1093 | C | 66.468615 | 59.534249 | 62.629174 |
| 1074 | C | 73.144904 | 54.754459 | 61.940683 | 1094 | H | 66.342167 | 58.715452 | 63.349954 |
| 1075 | N | 72.232002 | 55.205143 | 62.813215 | 1095 | H | 65.609823 | 60.206693 | 62.773878 |
| 1076 | H | 71.345704 | 54.722066 | 62.967523 | 1096 | C | 66.498601 | 58.986160 | 61.214541 |
| 1077 | H | 72.230618 | 56.211465 | 62.976269 | 1097 | C | 66.974601 | 57.692027 | 60.962353 |
| 1078 | N | 73.209353 | 53.469596 | 61.617161 | 1098 | H | 67.290004 | 57.060179 | 61.793956 |
| 1079 | H | 72.441526 | 52.830478 | 61.860338 | 1099 | C | 67.116152 | 57.192536 | 59.671775 |
| 1080 | H | 73.893581 | 53.095446 | 60.944855 | 1100 | H | 67.516835 | 56.187731 | 59.512019 |
| 1081 | C | 61.710517 | 47.567808 | 61.921587 | 1101 | C | 66.773912 | 58.002363 | 58.588144 |
| 1082 | H | 61.410787 | 46.923916 | 61.084805 | 1102 | O | 66.917772 | 57.590066 | 57.305285 |
| 1083 | H | 61.164426 | 48.506621 | 61.770116 | 1103 | H | 67.192177 | 56.661776 | 57.272303 |
| 1084 | N | 63.135268 | 47.857068 | 61.829105 | 1104 | C | 66.126122 | 59.762128 | 60.109275 |
| 1085 | H | 63.437028 | 48.829694 | 61.959355 | 1105 | H | 65.717235 | 60.765142 | 60.255630 |
| 1086 | C | 63.968079 | 47.170534 | 61.049225 | 1106 | C | 66.267434 | 59.285108 | 58.810702 |
| 1087 | N | 65.166616 | 47.677775 | 60.761605 | 1107 | H | 65.990932 | 59.898150 | 57.953714 |
| 1088 | H | 65.465669 | 48.553383 | 61.201786 | 1108 | C | 70.828011 | 46.956174 | 60.954744 |

|      |    |           |           |           |      |   |           |           |           |
|------|----|-----------|-----------|-----------|------|---|-----------|-----------|-----------|
| 1109 | H  | 70.192732 | 47.000898 | 60.059916 | 1131 | O | 68.635908 | 50.163731 | 64.079773 |
| 1110 | H  | 70.362554 | 46.318461 | 61.713466 | 1132 | O | 67.968209 | 53.825663 | 59.343020 |
| 1111 | C  | 70.937560 | 48.341669 | 61.518230 | 1133 | H | 64.483750 | 54.563428 | 57.733144 |
| 1112 | O  | 70.665591 | 48.616086 | 62.677037 | 1134 | O | 64.468320 | 50.402101 | 61.468097 |
| 1113 | O  | 71.319244 | 49.267099 | 60.678731 | 1135 | O | 64.445941 | 50.410199 | 59.243144 |
| 1114 | H  | 71.299689 | 50.162749 | 61.108743 | 1136 | H | 67.600341 | 52.782390 | 61.395268 |
| 1115 | Zn | 70.120784 | 49.051130 | 64.564954 | 1137 | H | 65.054865 | 52.556045 | 58.576775 |
| 1116 | C  | 66.863734 | 53.628574 | 58.801446 | 1138 | H | 64.167881 | 55.593870 | 55.471748 |
| 1117 | C  | 66.607468 | 54.298359 | 57.476440 | 1139 | H | 66.115037 | 55.890334 | 53.961756 |
| 1118 | C  | 65.330547 | 54.696194 | 57.056314 | 1140 | H | 68.377540 | 55.181548 | 54.692954 |
| 1119 | C  | 64.891050 | 50.778734 | 60.361852 | 1141 | H | 68.694530 | 54.207334 | 56.992575 |
| 1120 | C  | 66.005809 | 51.837063 | 60.337817 | 1142 | O | 63.272536 | 54.011101 | 59.940358 |
| 1121 | C  | 66.989439 | 51.887724 | 61.317955 | 1143 | H | 64.172104 | 53.654579 | 60.026214 |
| 1122 | C  | 67.384905 | 50.781187 | 62.138181 | 1144 | H | 63.383754 | 54.916810 | 60.312334 |
| 1123 | C  | 68.416999 | 51.102870 | 63.259193 | 1145 | h | 74.839780 | 55.279744 | 59.476845 |
| 1124 | C  | 65.871495 | 52.738654 | 59.263299 | 1146 | h | 61.365123 | 47.121501 | 62.854100 |
| 1125 | C  | 65.157956 | 55.276215 | 55.799320 | 1147 | h | 67.344908 | 60.107169 | 62.932389 |
| 1126 | C  | 66.251776 | 55.447051 | 54.947472 | 1148 | h | 71.782768 | 46.522239 | 60.657752 |
| 1127 | C  | 67.526492 | 55.056945 | 55.363003 | 1149 |   |           |           |           |
| 1128 | C  | 67.708571 | 54.502592 | 56.631240 | 1150 |   |           |           |           |
| 1129 | O  | 67.100343 | 49.595445 | 61.964121 | 1151 |   |           |           |           |
| 1130 | O  | 68.976298 | 52.197416 | 63.267854 | 1152 |   |           |           |           |

1153 **IM1**

|      |   |           |           |           |      |   |           |           |           |
|------|---|-----------|-----------|-----------|------|---|-----------|-----------|-----------|
| 1154 | C | 75.085123 | 55.378207 | 60.514409 | 1175 | N | 63.572170 | 45.969268 | 60.600697 |
| 1155 | H | 75.597539 | 54.461031 | 60.835271 | 1176 | H | 64.046598 | 45.620014 | 59.751770 |
| 1156 | H | 75.817864 | 56.184810 | 60.630873 | 1177 | H | 62.684866 | 45.555944 | 60.861646 |
| 1157 | N | 73.981018 | 55.655042 | 61.415441 | 1178 | C | 66.435944 | 59.597725 | 62.682229 |
| 1158 | H | 73.761564 | 56.622588 | 61.646481 | 1179 | H | 66.300380 | 58.784681 | 63.406135 |
| 1159 | C | 73.130312 | 54.752758 | 61.895207 | 1180 | H | 65.591635 | 60.287172 | 62.833315 |
| 1160 | N | 72.181321 | 55.179279 | 62.741261 | 1181 | C | 66.438822 | 59.049329 | 61.268001 |
| 1161 | H | 71.330298 | 54.649618 | 62.911798 | 1182 | C | 66.859262 | 57.736985 | 61.013574 |
| 1162 | H | 72.140268 | 56.182822 | 62.906930 | 1183 | H | 67.145200 | 57.090099 | 61.844836 |
| 1163 | N | 73.235639 | 53.467661 | 61.582826 | 1184 | C | 66.959823 | 57.234002 | 59.719577 |
| 1164 | H | 72.491403 | 52.808712 | 61.849157 | 1185 | H | 67.312685 | 56.215334 | 59.549242 |
| 1165 | H | 73.935304 | 53.101253 | 60.921789 | 1186 | C | 66.629923 | 58.050169 | 58.637234 |
| 1166 | C | 61.658420 | 47.693896 | 61.866815 | 1187 | O | 66.713370 | 57.625664 | 57.354450 |
| 1167 | H | 61.348849 | 47.082034 | 61.008863 | 1188 | H | 66.827050 | 56.663812 | 57.307615 |
| 1168 | H | 61.167145 | 48.665952 | 61.730011 | 1189 | C | 66.092635 | 59.841711 | 60.165154 |
| 1169 | N | 63.096730 | 47.908294 | 61.803640 | 1190 | H | 65.725226 | 60.859987 | 60.315646 |
| 1170 | H | 63.445525 | 48.859373 | 61.966587 | 1191 | C | 66.195955 | 59.358341 | 58.866111 |
| 1171 | C | 63.903824 | 47.193813 | 61.022266 | 1192 | H | 65.928741 | 59.978793 | 58.011990 |
| 1172 | N | 65.087615 | 47.706317 | 60.675076 | 1193 | C | 70.858865 | 46.980839 | 60.990121 |
| 1173 | H | 65.306996 | 48.647016 | 61.010652 | 1194 | H | 70.232451 | 47.058133 | 60.090999 |
| 1174 | H | 65.843000 | 47.104165 | 60.328520 | 1195 | H | 70.377722 | 46.329427 | 61.727205 |

|      |    |           |           |           |      |   |           |           |           |
|------|----|-----------|-----------|-----------|------|---|-----------|-----------|-----------|
| 1196 | C  | 70.978247 | 48.348768 | 61.594043 | 1218 | H | 63.868657 | 54.451727 | 58.213421 |
| 1197 | O  | 70.673798 | 48.594230 | 62.752109 | 1219 | O | 64.539247 | 50.376757 | 61.593242 |
| 1198 | O  | 71.399778 | 49.293063 | 60.795134 | 1220 | O | 65.101195 | 50.600061 | 59.451991 |
| 1199 | H  | 71.377059 | 50.175832 | 61.250399 | 1221 | H | 67.449975 | 53.179027 | 61.987524 |
| 1200 | Zn | 70.164409 | 49.015967 | 64.654653 | 1222 | H | 64.355283 | 53.364769 | 59.799488 |
| 1201 | C  | 66.434291 | 53.753713 | 59.086372 | 1223 | H | 63.364867 | 55.425232 | 55.956785 |
| 1202 | C  | 66.012686 | 54.323843 | 57.772992 | 1224 | H | 65.165507 | 55.764755 | 54.283540 |
| 1203 | C  | 64.683351 | 54.653632 | 57.477300 | 1225 | H | 67.501217 | 55.124578 | 54.802533 |
| 1204 | C  | 65.107454 | 50.963615 | 60.646014 | 1226 | H | 68.044504 | 54.196271 | 57.068999 |
| 1205 | C  | 65.863365 | 52.240710 | 60.951998 | 1227 | O | 62.678839 | 53.914569 | 59.524320 |
| 1206 | C  | 66.922753 | 52.248929 | 61.783914 | 1228 | H | 65.387148 | 54.354233 | 60.778937 |
| 1207 | C  | 67.488780 | 51.033520 | 62.375545 | 1229 | H | 63.011352 | 54.699915 | 59.979329 |
| 1208 | C  | 68.535465 | 51.223224 | 63.499444 | 1230 | h | 74.832363 | 55.300747 | 59.456969 |
| 1209 | C  | 65.421185 | 53.431070 | 60.160663 | 1231 | h | 61.276957 | 47.242999 | 62.782918 |
| 1210 | C  | 64.396418 | 55.174746 | 56.209537 | 1232 | h | 67.327834 | 60.153043 | 62.972439 |
| 1211 | C  | 65.401542 | 55.354476 | 55.262461 | 1233 | h | 71.808517 | 46.538729 | 60.688846 |
| 1212 | C  | 66.722698 | 55.003575 | 55.556914 | 1234 |   |           |           |           |
| 1213 | C  | 67.027751 | 54.491262 | 56.810672 | 1235 |   |           |           |           |
| 1214 | O  | 67.289001 | 49.903702 | 61.978360 | 1236 |   |           |           |           |
| 1215 | O  | 69.128891 | 52.294853 | 63.579512 | 1237 |   |           |           |           |
| 1216 | O  | 68.722770 | 50.202544 | 64.213739 | 1238 |   |           |           |           |
| 1217 | O  | 67.629837 | 53.599286 | 59.289371 | 1239 |   |           |           |           |

1240 **SnA2**

1241 **R**

|      |   |           |           |           |      |   |           |           |           |
|------|---|-----------|-----------|-----------|------|---|-----------|-----------|-----------|
| 1242 | C | 74.713759 | 54.351087 | 60.437783 | 1262 | H | 65.747402 | 46.604034 | 60.708186 |
| 1243 | H | 75.006702 | 53.355875 | 60.784776 | 1263 | N | 63.443358 | 45.475917 | 61.023393 |
| 1244 | H | 75.553653 | 55.025549 | 60.659927 | 1264 | H | 64.066879 | 44.841721 | 60.506996 |
| 1245 | N | 73.531546 | 54.803829 | 61.152750 | 1265 | H | 62.566158 | 45.082388 | 61.346252 |
| 1246 | H | 73.071577 | 55.660876 | 60.834009 | 1266 | C | 66.203698 | 59.694803 | 61.849137 |
| 1247 | C | 72.930876 | 54.214645 | 62.185933 | 1267 | H | 65.862423 | 58.976119 | 62.608084 |
| 1248 | N | 72.094098 | 54.921103 | 62.939753 | 1268 | H | 65.437225 | 60.481540 | 61.799637 |
| 1249 | H | 71.490972 | 54.402320 | 63.599235 | 1269 | C | 66.317389 | 58.998795 | 60.507282 |
| 1250 | H | 72.112641 | 55.945018 | 62.924250 | 1270 | C | 66.675751 | 57.645540 | 60.429342 |
| 1251 | N | 73.130800 | 52.928926 | 62.489650 | 1271 | H | 66.898133 | 57.090507 | 61.342131 |
| 1252 | H | 72.690883 | 52.580824 | 63.339638 | 1272 | C | 66.792944 | 56.978473 | 59.212923 |
| 1253 | H | 73.520961 | 52.242578 | 61.824241 | 1273 | H | 67.086425 | 55.924629 | 59.190033 |
| 1254 | C | 61.506722 | 47.196007 | 62.145338 | 1274 | C | 66.535104 | 57.675942 | 58.032659 |
| 1255 | H | 61.192108 | 46.528827 | 61.328808 | 1275 | O | 66.654946 | 57.088268 | 56.803898 |
| 1256 | H | 60.934531 | 48.123608 | 62.014319 | 1276 | H | 66.906245 | 56.157450 | 56.901104 |
| 1257 | N | 62.915179 | 47.510961 | 61.996990 | 1277 | C | 66.048648 | 59.667946 | 59.307927 |
| 1258 | H | 63.239138 | 48.489272 | 62.110698 | 1278 | H | 65.740749 | 60.716350 | 59.315699 |
| 1259 | C | 63.786748 | 46.726856 | 61.361948 | 1279 | C | 66.154586 | 59.016404 | 58.082534 |
| 1260 | N | 64.995747 | 47.207151 | 61.083288 | 1280 | H | 65.924046 | 59.537479 | 57.153640 |
| 1261 | H | 65.267746 | 48.128156 | 61.441465 | 1281 | C | 70.574600 | 46.478306 | 61.111402 |

|      |    |           |           |           |      |   |           |           |           |
|------|----|-----------|-----------|-----------|------|---|-----------|-----------|-----------|
| 1282 | H  | 69.961567 | 46.448754 | 60.202135 | 1304 | O | 68.596429 | 50.002926 | 64.040880 |
| 1283 | H  | 70.123378 | 45.867990 | 61.900995 | 1305 | O | 67.310284 | 53.485393 | 59.516585 |
| 1284 | C  | 70.621144 | 47.898548 | 61.583826 | 1306 | H | 63.939604 | 53.790674 | 57.431766 |
| 1285 | O  | 70.536951 | 48.231847 | 62.759385 | 1307 | O | 64.228436 | 49.939062 | 61.993851 |
| 1286 | O  | 70.759455 | 48.798149 | 60.646483 | 1308 | O | 63.258314 | 50.501921 | 60.089218 |
| 1287 | H  | 70.753471 | 49.720429 | 61.017409 | 1309 | H | 67.127517 | 52.431666 | 61.401338 |
| 1288 | Zn | 69.891892 | 48.696560 | 64.578910 | 1310 | H | 64.409617 | 52.075719 | 58.822094 |
| 1289 | C  | 66.241142 | 53.170662 | 58.938256 | 1311 | H | 63.887546 | 54.554653 | 55.077551 |
| 1290 | C  | 66.095741 | 53.673869 | 57.522722 | 1312 | H | 66.005184 | 54.868750 | 53.810020 |
| 1291 | C  | 64.873723 | 53.923585 | 56.886770 | 1313 | H | 68.190555 | 54.438214 | 54.931572 |
| 1292 | C  | 64.207367 | 50.555051 | 60.905628 | 1314 | H | 68.228964 | 53.688302 | 57.322687 |
| 1293 | C  | 65.399355 | 51.495921 | 60.613341 | 1315 | O | 68.832922 | 51.137112 | 59.249885 |
| 1294 | C  | 66.493474 | 51.552266 | 61.469551 | 1316 | H | 69.474004 | 51.200092 | 59.979046 |
| 1295 | C  | 67.075458 | 50.477927 | 62.236838 | 1317 | H | 68.293711 | 51.937277 | 59.382411 |
| 1296 | C  | 68.212383 | 50.890659 | 63.227738 | 1318 | h | 74.571502 | 54.325966 | 59.357413 |
| 1297 | C  | 65.250874 | 52.316298 | 59.462685 | 1319 | h | 61.217508 | 46.754108 | 63.098830 |
| 1298 | C  | 64.844354 | 54.357378 | 55.561608 | 1320 | h | 67.087324 | 60.200888 | 62.237918 |
| 1299 | C  | 66.032084 | 54.540581 | 54.848423 | 1321 | h | 71.557774 | 46.070717 | 60.876227 |
| 1300 | C  | 67.258086 | 54.300993 | 55.478748 | 1322 |   |           |           |           |
| 1301 | C  | 67.286840 | 53.883560 | 56.809673 | 1323 |   |           |           |           |
| 1302 | O  | 66.903229 | 49.273929 | 62.091553 | 1324 |   |           |           |           |
| 1303 | O  | 68.699852 | 52.025219 | 63.155373 | 1325 |   |           |           |           |

1326 **IMI**

|      |   |           |           |           |      |   |           |           |           |
|------|---|-----------|-----------|-----------|------|---|-----------|-----------|-----------|
| 1327 | C | 74.669035 | 54.446506 | 60.368652 | 1348 | N | 63.408659 | 45.420530 | 61.056493 |
| 1328 | H | 75.021040 | 53.484140 | 60.753274 | 1349 | H | 64.023891 | 44.787788 | 60.524707 |
| 1329 | H | 75.468671 | 55.176885 | 60.559471 | 1350 | H | 62.547216 | 45.011625 | 61.410813 |
| 1330 | N | 73.469877 | 54.855725 | 61.077679 | 1351 | C | 66.169138 | 59.751017 | 61.843339 |
| 1331 | H | 72.971513 | 55.689495 | 60.757361 | 1352 | H | 65.801441 | 59.055718 | 62.611429 |
| 1332 | C | 72.869608 | 54.208005 | 62.075161 | 1353 | H | 65.428631 | 60.561340 | 61.774917 |
| 1333 | N | 71.970018 | 54.853419 | 62.816074 | 1354 | C | 66.280342 | 59.025645 | 60.516699 |
| 1334 | H | 71.372386 | 54.289462 | 63.435927 | 1355 | C | 66.592785 | 57.660366 | 60.480269 |
| 1335 | H | 71.958787 | 55.874871 | 62.834694 | 1356 | H | 66.757128 | 57.125216 | 61.414796 |
| 1336 | N | 73.149631 | 52.938350 | 62.372076 | 1357 | C | 66.746995 | 56.966757 | 59.283228 |
| 1337 | H | 72.620735 | 52.553288 | 63.151917 | 1358 | H | 66.988169 | 55.900500 | 59.289219 |
| 1338 | H | 73.497733 | 52.267191 | 61.667284 | 1359 | C | 66.590155 | 57.653898 | 58.080604 |
| 1339 | C | 61.510696 | 47.179534 | 62.193525 | 1360 | O | 66.779313 | 57.047856 | 56.872867 |
| 1340 | H | 61.208701 | 46.565137 | 61.332490 | 1361 | H | 67.039183 | 56.121093 | 56.983859 |
| 1341 | H | 61.005410 | 48.146430 | 62.071173 | 1362 | C | 66.081197 | 59.676431 | 59.294188 |
| 1342 | N | 62.942403 | 47.415957 | 62.135788 | 1363 | H | 65.798510 | 60.730932 | 59.269213 |
| 1343 | H | 63.282502 | 48.377245 | 62.288160 | 1364 | C | 66.236881 | 59.003317 | 58.086183 |
| 1344 | C | 63.784323 | 46.643966 | 61.443363 | 1365 | H | 66.087164 | 59.514836 | 57.136448 |
| 1345 | N | 64.992362 | 47.123645 | 61.152333 | 1366 | C | 70.588279 | 46.482429 | 61.156729 |
| 1346 | H | 65.290966 | 47.996102 | 61.594070 | 1367 | H | 69.938763 | 46.390113 | 60.276610 |
| 1347 | H | 65.738888 | 46.525421 | 60.755430 | 1368 | H | 70.190967 | 45.894464 | 61.991299 |



|      |    |           |           |           |      |   |           |           |           |
|------|----|-----------|-----------|-----------|------|---|-----------|-----------|-----------|
| 1369 | C  | 70.587330 | 47.930071 | 61.546839 | 1391 | H | 64.156753 | 53.880663 | 57.319506 |
| 1370 | O  | 70.464694 | 48.334629 | 62.700722 | 1392 | O | 64.253082 | 49.909624 | 62.142120 |
| 1371 | O  | 70.693077 | 48.768847 | 60.556383 | 1393 | O | 63.251021 | 50.344845 | 60.209884 |
| 1372 | H  | 70.616340 | 49.726481 | 60.828534 | 1394 | H | 67.590950 | 51.277731 | 60.566372 |
| 1373 | Zn | 69.902454 | 48.666298 | 64.578523 | 1395 | H | 64.698761 | 51.354317 | 58.488805 |
| 1374 | C  | 66.174148 | 52.868831 | 58.944456 | 1396 | H | 64.467112 | 54.922736 | 55.073105 |
| 1375 | C  | 66.257295 | 53.434839 | 57.554349 | 1397 | H | 66.726402 | 55.029382 | 54.056613 |
| 1376 | C  | 65.148582 | 53.934968 | 56.868359 | 1398 | H | 68.686465 | 54.103862 | 55.267991 |
| 1377 | C  | 64.244122 | 50.350002 | 60.971784 | 1399 | H | 68.329905 | 52.960404 | 57.534586 |
| 1378 | C  | 65.565943 | 50.894301 | 60.439947 | 1400 | O | 68.449340 | 50.943705 | 58.452814 |
| 1379 | C  | 66.741378 | 50.834118 | 61.102169 | 1401 | H | 69.093945 | 50.665849 | 59.116748 |
| 1380 | C  | 67.137096 | 50.111714 | 62.335049 | 1402 | H | 66.462895 | 50.945321 | 58.538115 |
| 1381 | C  | 68.206891 | 50.817766 | 63.214823 | 1403 | h | 74.523879 | 54.369792 | 59.291103 |
| 1382 | C  | 65.624692 | 51.476436 | 59.058772 | 1404 | h | 61.138462 | 46.716671 | 63.107454 |
| 1383 | C  | 65.323802 | 54.511237 | 55.608387 | 1405 | h | 67.065347 | 60.233891 | 62.232837 |
| 1384 | C  | 66.595122 | 54.577115 | 55.039033 | 1406 | h | 71.568607 | 46.086966 | 60.890961 |
| 1385 | C  | 67.699537 | 54.063623 | 55.728156 | 1407 |   |           |           |           |
| 1386 | C  | 67.536555 | 53.482089 | 56.986260 | 1408 |   |           |           |           |
| 1387 | O  | 66.820594 | 48.981767 | 62.602247 | 1409 |   |           |           |           |
| 1388 | O  | 68.469904 | 51.989507 | 62.948121 | 1410 |   |           |           |           |
| 1389 | O  | 68.738436 | 50.141942 | 64.139458 | 1411 |   |           |           |           |
| 1390 | O  | 66.649617 | 53.494983 | 59.865760 | 1412 |   |           |           |           |

1413 **SnA3**

1414 **R**

|      |   |           |           |           |      |   |           |           |           |
|------|---|-----------|-----------|-----------|------|---|-----------|-----------|-----------|
| 1415 | C | 74.610280 | 54.314005 | 60.951778 | 1435 | H | 65.751270 | 46.211023 | 60.851458 |
| 1416 | H | 74.990299 | 53.368520 | 61.350990 | 1436 | N | 63.489425 | 45.101766 | 61.144896 |
| 1417 | H | 75.379152 | 55.074283 | 61.149195 | 1437 | H | 64.038795 | 44.523934 | 60.499450 |
| 1418 | N | 73.383522 | 54.681308 | 61.645912 | 1438 | H | 62.592094 | 44.719415 | 61.437699 |
| 1419 | H | 72.908104 | 55.544269 | 61.387355 | 1439 | C | 66.081129 | 60.454558 | 62.749403 |
| 1420 | C | 72.795648 | 54.007405 | 62.634832 | 1440 | H | 65.559236 | 59.900189 | 63.541599 |
| 1421 | N | 71.887166 | 54.617760 | 63.392489 | 1441 | H | 65.545233 | 61.408302 | 62.629388 |
| 1422 | H | 71.319174 | 54.029699 | 64.026262 | 1442 | C | 66.075805 | 59.650331 | 61.469722 |
| 1423 | H | 71.834561 | 55.638969 | 63.435847 | 1443 | C | 66.040740 | 58.253816 | 61.547471 |
| 1424 | N | 73.096444 | 52.735295 | 62.900299 | 1444 | H | 65.909633 | 57.777896 | 62.517936 |
| 1425 | H | 72.615264 | 52.323418 | 63.693339 | 1445 | C | 66.215480 | 57.448656 | 60.429323 |
| 1426 | H | 73.480395 | 52.085736 | 62.193500 | 1446 | H | 66.250874 | 56.361780 | 60.544388 |
| 1427 | C | 61.534118 | 46.840613 | 62.266557 | 1447 | C | 66.412425 | 58.054179 | 59.189642 |
| 1428 | H | 61.180724 | 46.016439 | 61.633906 | 1448 | O | 66.627850 | 57.314951 | 58.071285 |
| 1429 | H | 60.880197 | 47.695584 | 62.058673 | 1449 | H | 66.649985 | 56.371321 | 58.283226 |
| 1430 | N | 62.891388 | 47.210793 | 61.901367 | 1450 | C | 66.204502 | 60.234239 | 60.203221 |
| 1431 | H | 63.195833 | 48.210183 | 61.982853 | 1451 | H | 66.189509 | 61.320542 | 60.081953 |
| 1432 | C | 63.775745 | 46.397826 | 61.352214 | 1452 | C | 66.369778 | 59.445974 | 59.068262 |
| 1433 | N | 64.984774 | 46.877945 | 61.019256 | 1453 | H | 66.491837 | 59.907911 | 58.088984 |
| 1434 | H | 65.271952 | 47.771432 | 61.429653 | 1454 | C | 70.373909 | 46.615715 | 61.695269 |

|      |    |           |           |           |      |   |           |           |           |
|------|----|-----------|-----------|-----------|------|---|-----------|-----------|-----------|
| 1455 | H  | 69.681635 | 46.443395 | 60.862860 | 1477 | O | 68.354089 | 49.703218 | 64.532132 |
| 1456 | H  | 70.023491 | 46.083266 | 62.587355 | 1478 | O | 67.685402 | 52.448853 | 59.381926 |
| 1457 | C  | 70.373304 | 48.083447 | 61.995618 | 1479 | H | 64.077342 | 53.923783 | 58.404469 |
| 1458 | O  | 70.472996 | 48.553266 | 63.126652 | 1480 | O | 63.975148 | 49.690418 | 61.975828 |
| 1459 | O  | 70.253165 | 48.844982 | 60.947872 | 1481 | O | 63.900453 | 49.686229 | 59.748114 |
| 1460 | H  | 70.144450 | 49.822073 | 61.130232 | 1482 | H | 67.147911 | 52.030439 | 61.711739 |
| 1461 | Zn | 69.850356 | 48.607735 | 65.038489 | 1483 | H | 64.410292 | 52.108898 | 59.250132 |
| 1462 | C  | 66.486871 | 52.687192 | 59.146384 | 1484 | H | 63.716838 | 55.439186 | 56.495571 |
| 1463 | C  | 66.193800 | 53.658692 | 58.024936 | 1485 | H | 65.647478 | 56.162643 | 55.084945 |
| 1464 | C  | 64.919700 | 54.189231 | 57.765215 | 1486 | H | 67.902425 | 55.229978 | 55.525125 |
| 1465 | C  | 64.353067 | 50.073237 | 60.849027 | 1487 | H | 68.244119 | 53.629976 | 57.439658 |
| 1466 | C  | 65.483901 | 51.108928 | 60.792786 | 1488 | O | 66.860875 | 54.522084 | 61.429384 |
| 1467 | C  | 66.547573 | 51.125471 | 61.699213 | 1489 | H | 67.329767 | 54.496083 | 62.293215 |
| 1468 | C  | 66.998802 | 50.080173 | 62.563334 | 1490 | H | 66.177639 | 53.841654 | 61.483751 |
| 1469 | C  | 68.074715 | 50.526763 | 63.609080 | 1491 | h | 74.483600 | 54.221010 | 59.873181 |
| 1470 | C  | 65.371659 | 52.048642 | 59.755911 | 1492 | h | 61.440829 | 46.574971 | 63.319552 |
| 1471 | C  | 64.718231 | 55.061747 | 56.696301 | 1493 | h | 67.069634 | 60.730537 | 63.116500 |
| 1472 | C  | 65.791490 | 55.447971 | 55.892892 | 1494 | h | 71.352487 | 46.222804 | 61.419458 |
| 1473 | C  | 67.063948 | 54.930885 | 56.150859 | 1495 |   |           |           |           |
| 1474 | C  | 67.263523 | 54.043849 | 57.207509 | 1496 |   |           |           |           |
| 1475 | O  | 66.719264 | 48.885579 | 62.511498 | 1497 |   |           |           |           |
| 1476 | O  | 68.600560 | 51.640158 | 63.491186 | 1498 |   |           |           |           |

## 1499 TS1

|      |   |           |           |           |      |   |           |           |           |
|------|---|-----------|-----------|-----------|------|---|-----------|-----------|-----------|
| 1500 | C | 74.596596 | 54.325662 | 60.945426 | 1521 | N | 63.400446 | 45.249007 | 61.253143 |
| 1501 | H | 75.008029 | 53.395031 | 61.347727 | 1522 | H | 63.939765 | 44.682990 | 60.587745 |
| 1502 | H | 75.344776 | 55.111037 | 61.126743 | 1523 | H | 62.518420 | 44.854048 | 61.577811 |
| 1503 | N | 73.363690 | 54.656114 | 61.646534 | 1524 | C | 66.046989 | 60.601504 | 62.880395 |
| 1504 | H | 72.830199 | 55.480824 | 61.369139 | 1525 | H | 65.485414 | 60.212982 | 63.741022 |
| 1505 | C | 72.885772 | 54.035033 | 62.727431 | 1526 | H | 65.602936 | 61.578466 | 62.631193 |
| 1506 | N | 72.043973 | 54.665680 | 63.534600 | 1527 | C | 65.951985 | 59.614426 | 61.744285 |
| 1507 | H | 71.462140 | 54.090745 | 64.171825 | 1528 | C | 65.774518 | 58.264576 | 62.063820 |
| 1508 | H | 71.899258 | 55.677161 | 63.478654 | 1529 | H | 65.544578 | 58.008599 | 63.098015 |
| 1509 | N | 73.253134 | 52.786921 | 63.034732 | 1530 | C | 65.926318 | 57.259471 | 61.123702 |
| 1510 | H | 72.897871 | 52.414327 | 63.908383 | 1531 | H | 65.841562 | 56.210383 | 61.399603 |
| 1511 | H | 73.566364 | 52.109760 | 62.320454 | 1532 | C | 66.260247 | 57.585260 | 59.798580 |
| 1512 | C | 61.461039 | 47.038600 | 62.300898 | 1533 | O | 66.502416 | 56.629641 | 58.893990 |
| 1513 | H | 61.155496 | 46.317244 | 61.530001 | 1534 | H | 66.656201 | 55.744359 | 59.407014 |
| 1514 | H | 60.915041 | 47.963372 | 62.085331 | 1535 | C | 66.179334 | 59.940592 | 60.404111 |
| 1515 | N | 62.882112 | 47.315453 | 62.170692 | 1536 | H | 66.275493 | 60.983765 | 60.091798 |
| 1516 | H | 63.208022 | 48.296293 | 62.215228 | 1537 | C | 66.321935 | 58.943215 | 59.442334 |
| 1517 | C | 63.728188 | 46.516769 | 61.528930 | 1538 | H | 66.519839 | 59.223903 | 58.409738 |
| 1518 | N | 64.930340 | 46.991774 | 61.183748 | 1539 | C | 70.388027 | 46.552620 | 61.710587 |
| 1519 | H | 65.183966 | 47.927638 | 61.502053 | 1540 | H | 69.688017 | 46.359791 | 60.889049 |
| 1520 | H | 65.693299 | 46.346752 | 60.929689 | 1541 | H | 70.055109 | 46.036098 | 62.618227 |

|      |    |           |           |           |      |   |           |           |           |
|------|----|-----------|-----------|-----------|------|---|-----------|-----------|-----------|
| 1542 | C  | 70.384373 | 48.025601 | 61.973229 | 1564 | H | 63.907225 | 53.726675 | 57.999317 |
| 1543 | O  | 70.481234 | 48.531342 | 63.088392 | 1565 | O | 64.191920 | 49.763251 | 61.962320 |
| 1544 | O  | 70.264237 | 48.761230 | 60.905577 | 1566 | O | 64.013855 | 49.929257 | 59.742577 |
| 1545 | H  | 70.211462 | 49.742524 | 61.097821 | 1567 | H | 67.231581 | 52.311768 | 61.601727 |
| 1546 | Zn | 69.899842 | 48.722334 | 64.998643 | 1568 | H | 64.326422 | 52.640330 | 59.593217 |
| 1547 | C  | 66.279896 | 52.404323 | 58.708819 | 1569 | H | 63.670283 | 55.493980 | 56.324823 |
| 1548 | C  | 66.015147 | 53.402031 | 57.612957 | 1570 | H | 65.669266 | 56.298611 | 55.043946 |
| 1549 | C  | 64.778266 | 54.024282 | 57.417367 | 1571 | H | 67.844440 | 55.157335 | 55.337561 |
| 1550 | C  | 64.490127 | 50.251933 | 60.850905 | 1572 | H | 68.063277 | 53.290536 | 56.999827 |
| 1551 | C  | 65.545153 | 51.363917 | 60.846419 | 1573 | O | 67.006764 | 54.527545 | 60.263133 |
| 1552 | C  | 66.644313 | 51.395002 | 61.639650 | 1574 | H | 67.680485 | 54.143416 | 59.687858 |
| 1553 | C  | 67.177612 | 50.337561 | 62.506160 | 1575 | H | 65.992332 | 53.509743 | 60.204156 |
| 1554 | C  | 68.209615 | 50.804756 | 63.582395 | 1576 | h | 74.468057 | 54.215484 | 59.868670 |
| 1555 | C  | 65.368714 | 52.448229 | 59.859665 | 1577 | h | 61.131919 | 46.670060 | 63.272456 |
| 1556 | C  | 64.647089 | 55.041706 | 56.475471 | 1578 | h | 67.062389 | 60.826304 | 63.206730 |
| 1557 | C  | 65.752637 | 55.472309 | 55.748024 | 1579 | h | 71.368115 | 46.168818 | 61.427412 |
| 1558 | C  | 66.985164 | 54.834555 | 55.920981 | 1580 |   |           |           |           |
| 1559 | C  | 67.111720 | 53.795038 | 56.834206 | 1581 |   |           |           |           |
| 1560 | O  | 66.995549 | 49.146567 | 62.354568 | 1582 |   |           |           |           |
| 1561 | O  | 68.670221 | 51.938080 | 63.455403 | 1583 |   |           |           |           |
| 1562 | O  | 68.523621 | 49.972281 | 64.482340 | 1584 |   |           |           |           |
| 1563 | O  | 67.345271 | 51.804266 | 58.699761 | 1585 |   |           |           |           |

1586 **IMI**

|      |   |           |           |           |      |   |           |           |           |
|------|---|-----------|-----------|-----------|------|---|-----------|-----------|-----------|
| 1587 | C | 74.642978 | 54.309573 | 60.956485 | 1608 | N | 63.347588 | 45.198441 | 61.247748 |
| 1588 | H | 75.060151 | 53.378338 | 61.351314 | 1609 | H | 63.879794 | 44.636923 | 60.570821 |
| 1589 | H | 75.391448 | 55.096092 | 61.131008 | 1610 | H | 62.475613 | 44.796894 | 61.595303 |
| 1590 | N | 73.418834 | 54.638461 | 61.672626 | 1611 | C | 66.137194 | 60.403191 | 62.889837 |
| 1591 | H | 72.879227 | 55.461096 | 61.393244 | 1612 | H | 65.616257 | 59.932302 | 63.736405 |
| 1592 | C | 72.957209 | 54.023025 | 62.761549 | 1613 | H | 65.620334 | 61.358611 | 62.703983 |
| 1593 | N | 72.118458 | 54.655803 | 63.572594 | 1614 | C | 66.078753 | 59.485936 | 61.692778 |
| 1594 | H | 71.532037 | 54.084037 | 64.207570 | 1615 | C | 66.021400 | 58.102667 | 61.903811 |
| 1595 | H | 71.997778 | 55.672481 | 63.533465 | 1616 | H | 65.883740 | 57.751683 | 62.927301 |
| 1596 | N | 73.333625 | 52.778435 | 63.073635 | 1617 | C | 66.174740 | 57.186835 | 60.876748 |
| 1597 | H | 72.998734 | 52.413773 | 63.958140 | 1618 | H | 66.154660 | 56.116509 | 61.089777 |
| 1598 | H | 73.617004 | 52.092518 | 62.355548 | 1619 | C | 66.390759 | 57.610981 | 59.535223 |
| 1599 | C | 61.402637 | 46.995240 | 62.304973 | 1620 | O | 66.636483 | 56.767108 | 58.582056 |
| 1600 | H | 61.089074 | 46.262948 | 61.548229 | 1621 | H | 67.207553 | 55.543362 | 59.198738 |
| 1601 | H | 60.851347 | 47.915858 | 62.084472 | 1622 | C | 66.206167 | 59.922047 | 60.368415 |
| 1602 | N | 62.821730 | 47.271040 | 62.149193 | 1623 | H | 66.212621 | 60.990791 | 60.135261 |
| 1603 | H | 63.143692 | 48.246577 | 62.190992 | 1624 | C | 66.337641 | 59.019266 | 59.320500 |
| 1604 | C | 63.664686 | 46.471460 | 61.501052 | 1625 | H | 66.445244 | 59.399049 | 58.304103 |
| 1605 | N | 64.853068 | 46.958974 | 61.128127 | 1626 | C | 70.426832 | 46.693993 | 61.602733 |
| 1606 | H | 65.079354 | 47.912846 | 61.410219 | 1627 | H | 69.802559 | 46.643232 | 60.703314 |
| 1607 | H | 65.626926 | 46.324101 | 60.880172 | 1628 | H | 69.960051 | 46.135604 | 62.422302 |

|      |    |           |           |           |      |   |           |           |           |
|------|----|-----------|-----------|-----------|------|---|-----------|-----------|-----------|
| 1629 | C  | 70.542254 | 48.125539 | 62.024025 | 1651 | H | 63.654408 | 53.826418 | 58.108658 |
| 1630 | O  | 70.603631 | 48.487136 | 63.194893 | 1652 | O | 64.215672 | 49.716887 | 61.872679 |
| 1631 | O  | 70.586923 | 48.987458 | 61.049455 | 1653 | O | 64.062334 | 50.034367 | 59.665250 |
| 1632 | H  | 70.651060 | 49.936648 | 61.363943 | 1654 | H | 67.217015 | 52.383247 | 61.613986 |
| 1633 | Zn | 69.909774 | 48.723244 | 65.043483 | 1655 | H | 64.149584 | 52.608573 | 59.692414 |
| 1634 | C  | 66.074191 | 52.570704 | 58.723746 | 1656 | H | 63.305613 | 55.532314 | 56.389879 |
| 1635 | C  | 65.759201 | 53.562302 | 57.654842 | 1657 | H | 65.252527 | 56.412468 | 55.075114 |
| 1636 | C  | 64.498996 | 54.142632 | 57.496645 | 1658 | H | 67.471557 | 55.375226 | 55.326318 |
| 1637 | C  | 64.511489 | 50.287183 | 60.802422 | 1659 | H | 67.780271 | 53.468083 | 56.934697 |
| 1638 | C  | 65.502823 | 51.444857 | 60.891616 | 1660 | O | 67.646865 | 54.686144 | 59.614695 |
| 1639 | C  | 66.620443 | 51.470827 | 61.644192 | 1661 | H | 68.200247 | 54.365244 | 58.895460 |
| 1640 | C  | 67.184608 | 50.382335 | 62.477020 | 1662 | H | 65.456927 | 53.563024 | 60.443767 |
| 1641 | C  | 68.188354 | 50.823953 | 63.591459 | 1663 | h | 74.499810 | 54.204658 | 59.881049 |
| 1642 | C  | 65.209217 | 52.595900 | 59.974788 | 1664 | h | 61.093914 | 46.641330 | 63.288591 |
| 1643 | C  | 64.304482 | 55.129118 | 56.532716 | 1665 | h | 67.134536 | 60.689256 | 63.223815 |
| 1644 | C  | 65.376625 | 55.593308 | 55.780266 | 1666 | h | 71.395387 | 46.246708 | 61.379341 |
| 1645 | C  | 66.637013 | 55.001367 | 55.918386 | 1667 |   |           |           |           |
| 1646 | C  | 66.814923 | 53.963390 | 56.820209 | 1668 |   |           |           |           |
| 1647 | O  | 67.032290 | 49.201086 | 62.263211 | 1669 |   |           |           |           |
| 1648 | O  | 68.593847 | 51.982400 | 63.531737 | 1670 |   |           |           |           |
| 1649 | O  | 68.533813 | 49.944445 | 64.430750 | 1671 |   |           |           |           |
| 1650 | O  | 67.024020 | 51.828637 | 58.605645 | 1672 |   |           |           |           |

1673 **TS2**

|      |   |           |           |           |      |   |           |           |           |
|------|---|-----------|-----------|-----------|------|---|-----------|-----------|-----------|
| 1674 | C | 74.646866 | 54.298265 | 60.955332 | 1695 | N | 63.356675 | 45.226921 | 61.253952 |
| 1675 | H | 75.062317 | 53.364969 | 61.346931 | 1696 | H | 63.888206 | 44.663232 | 60.579236 |
| 1676 | H | 75.396736 | 55.082856 | 61.133171 | 1697 | H | 62.484043 | 44.825209 | 61.597729 |
| 1677 | N | 73.421834 | 54.625599 | 61.670451 | 1698 | C | 66.133637 | 60.385713 | 62.862643 |
| 1678 | H | 72.874819 | 55.440711 | 61.385248 | 1699 | H | 65.617090 | 59.924140 | 63.716325 |
| 1679 | C | 72.959352 | 54.010471 | 62.759707 | 1700 | H | 65.607604 | 61.330444 | 62.655736 |
| 1680 | N | 72.114527 | 54.643242 | 63.564077 | 1701 | C | 66.091587 | 59.437765 | 61.687137 |
| 1681 | H | 71.535004 | 54.074429 | 64.208660 | 1702 | C | 66.059272 | 58.062023 | 61.941346 |
| 1682 | H | 71.992483 | 55.658897 | 63.520401 | 1703 | H | 65.925859 | 57.740560 | 62.973174 |
| 1683 | N | 73.342837 | 52.769888 | 63.078254 | 1704 | C | 66.248278 | 57.118414 | 60.943269 |
| 1684 | H | 73.001142 | 52.405212 | 63.960370 | 1705 | H | 66.287422 | 56.051257 | 61.161944 |
| 1685 | H | 73.623480 | 52.081985 | 62.360445 | 1706 | C | 66.459959 | 57.538640 | 59.619260 |
| 1686 | C | 61.407327 | 47.014026 | 62.301166 | 1707 | O | 66.726508 | 56.662273 | 58.647776 |
| 1687 | H | 61.102156 | 46.283016 | 61.539820 | 1708 | H | 66.961548 | 55.741920 | 59.059844 |
| 1688 | H | 60.849985 | 47.930862 | 62.081543 | 1709 | C | 66.215081 | 59.846579 | 60.355951 |
| 1689 | N | 62.825148 | 47.299152 | 62.151800 | 1710 | H | 66.205201 | 60.908296 | 60.096436 |
| 1690 | H | 63.147017 | 48.274952 | 62.200712 | 1711 | C | 66.383142 | 58.914502 | 59.335861 |
| 1691 | C | 63.672979 | 46.501477 | 61.507076 | 1712 | H | 66.495517 | 59.264001 | 58.311165 |
| 1692 | N | 64.861837 | 46.989140 | 61.140380 | 1713 | C | 70.433927 | 46.710067 | 61.599719 |
| 1693 | H | 65.084850 | 47.946521 | 61.417242 | 1714 | H | 69.811640 | 46.663185 | 60.698775 |
| 1694 | H | 65.634569 | 46.353379 | 60.891398 | 1715 | H | 69.962325 | 46.153048 | 62.417392 |



|      |    |           |           |           |      |   |           |           |           |
|------|----|-----------|-----------|-----------|------|---|-----------|-----------|-----------|
| 1716 | C  | 70.551312 | 48.141191 | 62.022228 | 1738 | H | 63.777962 | 53.964026 | 58.209522 |
| 1717 | O  | 70.604033 | 48.501562 | 63.194202 | 1739 | O | 64.257309 | 49.750961 | 61.895928 |
| 1718 | O  | 70.607315 | 49.001781 | 61.048467 | 1740 | O | 64.087616 | 50.033956 | 59.688403 |
| 1719 | H  | 70.659528 | 49.952551 | 61.359074 | 1741 | H | 67.258191 | 52.416331 | 61.561697 |
| 1720 | Zn | 69.901031 | 48.745780 | 65.035033 | 1742 | H | 64.241994 | 52.513703 | 59.553155 |
| 1721 | C  | 66.255044 | 52.780367 | 58.834584 | 1743 | H | 63.330792 | 55.537984 | 56.387321 |
| 1722 | C  | 65.874543 | 53.721175 | 57.717804 | 1744 | H | 65.205491 | 56.365958 | 54.947485 |
| 1723 | C  | 64.596204 | 54.254231 | 57.551061 | 1745 | H | 67.460821 | 55.386321 | 55.196532 |
| 1724 | C  | 64.546093 | 50.311621 | 60.816260 | 1746 | H | 67.866981 | 53.620251 | 56.938732 |
| 1725 | C  | 65.542633 | 51.471271 | 60.877450 | 1747 | O | 67.374701 | 54.376881 | 59.707158 |
| 1726 | C  | 66.666421 | 51.502373 | 61.623205 | 1748 | H | 68.113547 | 54.138174 | 59.132846 |
| 1727 | C  | 67.227490 | 50.421288 | 62.459678 | 1749 | H | 65.260872 | 53.582897 | 60.542145 |
| 1728 | C  | 68.215572 | 50.868707 | 63.582331 | 1750 | h | 74.504244 | 54.196718 | 59.879500 |
| 1729 | C  | 65.244234 | 52.639406 | 59.981922 | 1751 | h | 61.095923 | 46.652266 | 63.281076 |
| 1730 | C  | 64.345113 | 55.170574 | 56.527446 | 1752 | h | 67.129535 | 60.679343 | 63.194357 |
| 1731 | C  | 65.377348 | 55.605669 | 55.705996 | 1753 | h | 71.401434 | 46.259188 | 61.379029 |
| 1732 | C  | 66.654912 | 55.049732 | 55.848364 | 1754 |   |           |           |           |
| 1733 | C  | 66.887005 | 54.082438 | 56.816200 | 1755 |   |           |           |           |
| 1734 | O  | 67.081196 | 49.237394 | 62.250625 | 1756 |   |           |           |           |
| 1735 | O  | 68.621795 | 52.027895 | 63.526346 | 1757 |   |           |           |           |
| 1736 | O  | 68.552980 | 49.996298 | 64.434523 | 1758 |   |           |           |           |
| 1737 | O  | 67.129264 | 51.949184 | 58.635165 | 1759 |   |           |           |           |

1760 **IM2**

|      |   |           |           |           |      |   |           |           |           |
|------|---|-----------|-----------|-----------|------|---|-----------|-----------|-----------|
| 1761 | C | 74.639881 | 54.283701 | 60.967114 | 1782 | N | 63.373782 | 45.284213 | 61.283821 |
| 1762 | H | 75.056897 | 53.349370 | 61.354293 | 1783 | H | 63.910950 | 44.710399 | 60.623207 |
| 1763 | H | 75.387552 | 55.068999 | 61.151200 | 1784 | H | 62.487410 | 44.897741 | 61.606110 |
| 1764 | N | 73.412016 | 54.602597 | 61.682536 | 1785 | C | 66.107472 | 60.428232 | 62.823031 |
| 1765 | H | 72.865462 | 55.419053 | 61.406569 | 1786 | H | 65.576669 | 59.974351 | 63.670568 |
| 1766 | C | 72.960035 | 53.988361 | 62.777876 | 1787 | H | 65.593018 | 61.376516 | 62.607255 |
| 1767 | N | 72.120488 | 54.621834 | 63.587848 | 1788 | C | 66.068287 | 59.476750 | 61.650461 |
| 1768 | H | 71.543482 | 54.052731 | 64.234926 | 1789 | C | 65.991475 | 58.104955 | 61.910752 |
| 1769 | H | 71.984477 | 55.634429 | 63.531320 | 1790 | H | 65.832236 | 57.782238 | 62.938751 |
| 1770 | N | 73.349718 | 52.750238 | 63.094297 | 1791 | C | 66.162196 | 57.157518 | 60.910921 |
| 1771 | H | 73.008391 | 52.380804 | 63.974661 | 1792 | H | 66.146082 | 56.089710 | 61.135866 |
| 1772 | H | 73.626765 | 52.063710 | 62.372457 | 1793 | C | 66.404742 | 57.580061 | 59.599858 |
| 1773 | C | 61.447501 | 47.090571 | 62.315409 | 1794 | O | 66.654171 | 56.694501 | 58.612786 |
| 1774 | H | 61.140847 | 46.394343 | 61.522010 | 1795 | H | 66.735440 | 55.796022 | 58.988018 |
| 1775 | H | 60.914017 | 48.026756 | 62.121124 | 1796 | C | 66.221405 | 59.882971 | 60.321130 |
| 1776 | N | 62.872026 | 47.353594 | 62.202264 | 1797 | H | 66.237724 | 60.943556 | 60.060377 |
| 1777 | H | 63.205715 | 48.330943 | 62.250268 | 1798 | C | 66.381414 | 58.948264 | 59.302543 |
| 1778 | C | 63.714624 | 46.548186 | 61.563292 | 1799 | H | 66.513847 | 59.279743 | 58.274020 |
| 1779 | N | 64.922631 | 47.011078 | 61.228168 | 1800 | C | 70.509400 | 46.673279 | 61.648083 |
| 1780 | H | 65.182912 | 47.947742 | 61.538777 | 1801 | H | 69.882826 | 46.643038 | 60.748715 |
| 1781 | H | 65.680431 | 46.357659 | 60.979084 | 1802 | H | 70.029356 | 46.123829 | 62.465572 |

|      |    |           |           |           |      |   |           |           |           |
|------|----|-----------|-----------|-----------|------|---|-----------|-----------|-----------|
| 1803 | C  | 70.650221 | 48.103843 | 62.063217 | 1825 | H | 63.880006 | 53.977763 | 58.352844 |
| 1804 | O  | 70.604333 | 48.481989 | 63.231474 | 1826 | O | 64.188385 | 49.817488 | 61.999304 |
| 1805 | O  | 70.829896 | 48.942891 | 61.091824 | 1827 | O | 64.170420 | 49.867277 | 59.767854 |
| 1806 | H  | 70.811348 | 49.899596 | 61.382026 | 1828 | H | 67.329525 | 52.292800 | 61.549038 |
| 1807 | Zn | 69.906546 | 48.713973 | 65.064724 | 1829 | H | 64.486904 | 52.158262 | 59.256725 |
| 1808 | C  | 66.475068 | 52.944691 | 59.026669 | 1830 | H | 63.322997 | 55.428454 | 56.454213 |
| 1809 | C  | 65.969223 | 53.781181 | 57.826255 | 1831 | H | 65.127033 | 56.238154 | 54.912885 |
| 1810 | C  | 64.669836 | 54.265192 | 57.659791 | 1832 | H | 67.426523 | 55.371330 | 55.173948 |
| 1811 | C  | 64.553236 | 50.260451 | 60.890183 | 1833 | H | 67.935328 | 53.699135 | 56.998384 |
| 1812 | C  | 65.573722 | 51.402201 | 60.885283 | 1834 | O | 67.223838 | 54.005718 | 59.818219 |
| 1813 | C  | 66.687347 | 51.423067 | 61.645897 | 1835 | H | 68.096807 | 53.923911 | 59.404856 |
| 1814 | C  | 67.184598 | 50.369945 | 62.549940 | 1836 | H | 64.881574 | 53.391160 | 60.464902 |
| 1815 | C  | 68.231974 | 50.831308 | 63.616149 | 1837 | h | 74.500707 | 54.185307 | 59.890538 |
| 1816 | C  | 65.276386 | 52.517459 | 59.925133 | 1838 | h | 61.107086 | 46.702173 | 63.275268 |
| 1817 | C  | 64.354510 | 55.109341 | 56.591200 | 1839 | h | 67.102478 | 60.714794 | 63.163490 |
| 1818 | C  | 65.349198 | 55.537811 | 55.717125 | 1840 | h | 71.467063 | 46.210305 | 61.410168 |
| 1819 | C  | 66.651776 | 55.047509 | 55.868195 | 1841 |   |           |           |           |
| 1820 | C  | 66.942922 | 54.141657 | 56.883452 | 1842 |   |           |           |           |
| 1821 | O  | 66.933222 | 49.190813 | 62.455397 | 1843 |   |           |           |           |
| 1822 | O  | 68.674743 | 51.976559 | 63.510370 | 1844 |   |           |           |           |
| 1823 | O  | 68.565368 | 49.988053 | 64.496066 | 1845 |   |           |           |           |
| 1824 | O  | 67.287500 | 52.000278 | 58.670692 | 1846 |   |           |           |           |

## 1847 TS3

|      |   |           |           |           |      |   |           |           |           |
|------|---|-----------|-----------|-----------|------|---|-----------|-----------|-----------|
| 1848 | C | 74.594351 | 54.320792 | 60.937832 | 1869 | N | 63.382344 | 45.195062 | 61.284269 |
| 1849 | H | 74.993234 | 53.382693 | 61.335267 | 1870 | H | 63.917146 | 44.615208 | 60.627342 |
| 1850 | H | 75.352300 | 55.095089 | 61.125455 | 1871 | H | 62.491415 | 44.818028 | 61.604357 |
| 1851 | N | 73.365539 | 54.664349 | 61.641050 | 1872 | C | 66.002164 | 60.650382 | 62.860176 |
| 1852 | H | 72.853494 | 55.502210 | 61.373744 | 1873 | H | 65.444158 | 60.188965 | 63.685668 |
| 1853 | C | 72.874303 | 54.038566 | 62.712542 | 1874 | H | 65.545380 | 61.636126 | 62.680773 |
| 1854 | N | 72.032695 | 54.674409 | 63.519633 | 1875 | C | 65.937931 | 59.752486 | 61.649309 |
| 1855 | H | 71.487093 | 54.102894 | 64.190845 | 1876 | C | 65.651933 | 58.400029 | 61.848495 |
| 1856 | H | 71.915172 | 55.690242 | 63.485267 | 1877 | H | 65.285615 | 58.087864 | 62.824157 |
| 1857 | N | 73.223167 | 52.785985 | 63.013707 | 1878 | C | 65.841783 | 57.455794 | 60.849577 |
| 1858 | H | 72.843599 | 52.407418 | 63.874932 | 1879 | H | 65.647289 | 56.399274 | 61.032286 |
| 1859 | H | 73.546897 | 52.110642 | 62.301015 | 1880 | C | 66.331878 | 57.867812 | 59.605725 |
| 1860 | C | 61.423072 | 47.013381 | 62.253696 | 1881 | O | 66.648269 | 56.972722 | 58.641542 |
| 1861 | H | 61.111914 | 46.264177 | 61.511643 | 1882 | H | 66.732933 | 56.092049 | 59.046666 |
| 1862 | H | 60.866604 | 47.926621 | 62.015417 | 1883 | C | 66.294867 | 60.163891 | 60.359546 |
| 1863 | N | 62.837749 | 47.296526 | 62.099936 | 1884 | H | 66.462331 | 61.219877 | 60.132865 |
| 1864 | H | 63.168971 | 48.281559 | 62.109148 | 1885 | C | 66.489785 | 59.233631 | 59.344442 |
| 1865 | C | 63.698099 | 46.479010 | 61.507805 | 1886 | H | 66.809617 | 59.565215 | 58.358305 |
| 1866 | N | 64.901292 | 46.949081 | 61.158837 | 1887 | C | 70.392703 | 46.645292 | 61.676870 |
| 1867 | H | 65.143545 | 47.901001 | 61.446361 | 1888 | H | 69.704905 | 46.474310 | 60.840862 |
| 1868 | H | 65.673058 | 46.298075 | 60.956032 | 1889 | H | 70.027747 | 46.126231 | 62.571007 |

|      |    |           |           |           |      |   |           |           |           |
|------|----|-----------|-----------|-----------|------|---|-----------|-----------|-----------|
| 1890 | C  | 70.404342 | 48.116406 | 61.962291 | 1912 | H | 64.169723 | 54.220320 | 58.677209 |
| 1891 | O  | 70.515128 | 48.597024 | 63.087127 | 1913 | O | 64.153304 | 49.651153 | 61.890930 |
| 1892 | O  | 70.294819 | 48.866643 | 60.905663 | 1914 | O | 64.147286 | 50.025865 | 59.695792 |
| 1893 | H  | 70.195417 | 49.845233 | 61.085898 | 1915 | H | 66.828179 | 52.498127 | 62.298049 |
| 1894 | Zn | 69.911765 | 48.736129 | 64.995403 | 1916 | H | 64.141240 | 52.570020 | 59.786688 |
| 1895 | C  | 66.775490 | 53.397311 | 59.562045 | 1917 | H | 63.677688 | 55.358116 | 56.550277 |
| 1896 | C  | 66.255150 | 53.865099 | 58.207012 | 1918 | H | 65.513307 | 55.863787 | 54.941115 |
| 1897 | C  | 64.966512 | 54.347052 | 57.945613 | 1919 | H | 67.791013 | 54.950070 | 55.358848 |
| 1898 | C  | 64.508090 | 50.279190 | 60.863684 | 1920 | H | 68.245587 | 53.655516 | 57.459862 |
| 1899 | C  | 65.351257 | 51.515990 | 61.156442 | 1921 | O | 66.938041 | 54.558501 | 60.318802 |
| 1900 | C  | 66.406535 | 51.525394 | 62.061576 | 1922 | H | 67.613249 | 54.390636 | 61.013721 |
| 1901 | C  | 67.136346 | 50.422590 | 62.593830 | 1923 | H | 64.969899 | 53.625664 | 61.049466 |
| 1902 | C  | 68.239272 | 50.829336 | 63.612774 | 1924 | h | 74.464639 | 54.217894 | 59.860496 |
| 1903 | C  | 64.971064 | 52.694135 | 60.483470 | 1925 | h | 61.118307 | 46.679883 | 63.245645 |
| 1904 | C  | 64.692721 | 55.018217 | 56.753936 | 1926 | h | 67.014817 | 60.865847 | 63.201021 |
| 1905 | C  | 65.711727 | 55.272964 | 55.835307 | 1927 | h | 71.370416 | 46.242527 | 61.412434 |
| 1906 | C  | 66.989859 | 54.765326 | 56.075521 | 1928 |   |           |           |           |
| 1907 | C  | 67.250837 | 54.043888 | 57.240593 | 1929 |   |           |           |           |
| 1908 | O  | 67.065481 | 49.233622 | 62.275888 | 1930 |   |           |           |           |
| 1909 | O  | 68.778467 | 51.937761 | 63.485129 | 1931 |   |           |           |           |
| 1910 | O  | 68.543511 | 49.989973 | 64.513761 | 1932 |   |           |           |           |
| 1911 | O  | 67.669084 | 52.544703 | 59.647473 | 1933 |   |           |           |           |

1934 P

|      |   |           |           |           |      |   |           |           |           |
|------|---|-----------|-----------|-----------|------|---|-----------|-----------|-----------|
| 1935 | C | 74.651205 | 54.303512 | 60.976928 | 1956 | N | 63.468000 | 45.203088 | 61.283043 |
| 1936 | H | 75.039144 | 53.359414 | 61.371150 | 1957 | H | 64.007525 | 44.626323 | 60.629875 |
| 1937 | H | 75.421084 | 55.065938 | 61.162859 | 1958 | H | 62.567478 | 44.831300 | 61.576238 |
| 1938 | N | 73.433407 | 54.665443 | 61.689918 | 1959 | C | 66.026467 | 60.558944 | 62.757468 |
| 1939 | H | 72.964355 | 55.535580 | 61.454772 | 1960 | H | 65.481934 | 60.013204 | 63.539872 |
| 1940 | C | 72.892181 | 54.009234 | 62.718433 | 1961 | H | 65.518776 | 61.528366 | 62.639737 |
| 1941 | N | 72.047303 | 54.640029 | 63.527864 | 1962 | C | 66.014804 | 59.769398 | 61.470088 |
| 1942 | H | 71.465753 | 54.063547 | 64.164081 | 1963 | C | 65.861543 | 58.381629 | 61.530284 |
| 1943 | H | 71.950360 | 55.658394 | 63.512824 | 1964 | H | 65.622496 | 57.919023 | 62.485357 |
| 1944 | N | 73.194300 | 52.736810 | 62.976840 | 1965 | C | 66.019626 | 57.579805 | 60.406756 |
| 1945 | H | 72.765308 | 52.328636 | 63.800402 | 1966 | H | 65.922156 | 56.495142 | 60.479664 |
| 1946 | H | 73.539457 | 52.081510 | 62.254754 | 1967 | C | 66.329103 | 58.178271 | 59.185158 |
| 1947 | C | 61.482846 | 46.993755 | 62.239085 | 1968 | O | 66.535249 | 57.435766 | 58.068348 |
| 1948 | H | 61.179427 | 46.229759 | 61.508433 | 1969 | H | 66.510041 | 56.494794 | 58.283218 |
| 1949 | H | 60.912419 | 47.896528 | 61.990511 | 1970 | C | 66.238881 | 60.354110 | 60.216329 |
| 1950 | N | 62.891183 | 47.298689 | 62.086654 | 1971 | H | 66.302349 | 61.439656 | 60.106695 |
| 1951 | H | 63.218421 | 48.305351 | 62.097388 | 1972 | C | 66.395893 | 59.569476 | 59.079589 |
| 1952 | C | 63.769233 | 46.494881 | 61.512190 | 1973 | H | 66.589760 | 60.027268 | 58.109808 |
| 1953 | N | 64.978187 | 46.970378 | 61.182858 | 1974 | C | 70.350746 | 46.633336 | 61.657298 |
| 1954 | H | 65.253621 | 47.912934 | 61.486406 | 1975 | H | 69.672385 | 46.473238 | 60.811861 |
| 1955 | H | 65.743031 | 46.310173 | 60.987690 | 1976 | H | 69.960909 | 46.127185 | 62.548059 |

|      |    |           |           |           |      |   |           |           |           |
|------|----|-----------|-----------|-----------|------|---|-----------|-----------|-----------|
| 1977 | C  | 70.407701 | 48.103443 | 61.936387 | 1999 | H | 64.832191 | 54.056854 | 59.025803 |
| 1978 | O  | 70.552888 | 48.585157 | 63.056446 | 2000 | O | 64.013013 | 49.650205 | 61.990569 |
| 1979 | O  | 70.330225 | 48.854419 | 60.876531 | 2001 | O | 63.992234 | 49.981922 | 59.787103 |
| 1980 | H  | 70.311255 | 49.834984 | 61.070564 | 2002 | H | 66.604036 | 52.516777 | 62.461613 |
| 1981 | Zn | 69.845946 | 48.765963 | 64.924388 | 2003 | H | 63.475669 | 52.630118 | 60.339124 |
| 1982 | C  | 67.531519 | 53.766038 | 59.370866 | 2004 | H | 63.666624 | 54.966168 | 57.000710 |
| 1983 | C  | 66.789242 | 54.190911 | 58.138382 | 2005 | H | 65.010831 | 55.752383 | 55.065557 |
| 1984 | C  | 65.396172 | 54.351109 | 58.142221 | 2006 | H | 67.459735 | 55.452835 | 55.044944 |
| 1985 | C  | 64.330209 | 50.282039 | 60.952840 | 2007 | H | 68.612039 | 54.397497 | 57.019145 |
| 1986 | C  | 65.091556 | 51.570202 | 61.231647 | 2008 | O | 67.132679 | 54.441788 | 60.433535 |
| 1987 | C  | 66.297989 | 51.562175 | 62.035726 | 2009 | H | 67.691885 | 54.233713 | 61.225335 |
| 1988 | C  | 67.048293 | 50.449033 | 62.403359 | 2010 | H | 64.778950 | 53.681737 | 61.173261 |
| 1989 | C  | 68.163563 | 50.750925 | 63.429191 | 2011 | h | 74.511790 | 54.206710 | 59.900239 |
| 1990 | C  | 64.431029 | 52.693100 | 60.863566 | 2012 | h | 61.183886 | 46.670071 | 63.236039 |
| 1991 | C  | 64.752098 | 54.864790 | 57.017565 | 2013 | h | 67.020136 | 60.806669 | 63.130725 |
| 1992 | C  | 65.502292 | 55.282443 | 55.915899 | 2014 | h | 71.329871 | 46.221648 | 61.412565 |
| 1993 | C  | 66.887510 | 55.110751 | 55.907714 | 2015 |   |           |           |           |
| 1994 | C  | 67.530754 | 54.534387 | 57.004985 | 2016 |   |           |           |           |
| 1995 | O  | 66.964182 | 49.258219 | 61.994283 | 2017 |   |           |           |           |
| 1996 | O  | 68.806541 | 51.815512 | 63.349585 | 2018 |   |           |           |           |
| 1997 | O  | 68.402088 | 49.869761 | 64.316954 | 2019 |   |           |           |           |
| 1998 | O  | 68.441950 | 52.976693 | 59.373714 | 2020 |   |           |           |           |

2021 **SnA4**

2022 **R**

|      |   |           |           |           |      |   |           |           |           |
|------|---|-----------|-----------|-----------|------|---|-----------|-----------|-----------|
| 2023 | C | 73.467155 | 54.254865 | 56.684825 | 2043 | H | 65.709425 | 47.022491 | 57.077747 |
| 2024 | H | 73.915216 | 53.379120 | 57.161511 | 2044 | N | 63.477308 | 45.785305 | 57.021257 |
| 2025 | H | 74.031084 | 55.137068 | 57.020767 | 2045 | H | 64.225427 | 45.234853 | 56.575045 |
| 2026 | N | 72.075478 | 54.392930 | 57.083499 | 2046 | H | 62.522076 | 45.511830 | 56.800547 |
| 2027 | H | 71.597103 | 55.249570 | 56.777090 | 2047 | C | 65.610653 | 58.696883 | 59.430249 |
| 2028 | C | 71.358374 | 53.597664 | 57.878266 | 2048 | H | 65.604209 | 57.718129 | 59.931280 |
| 2029 | N | 70.104748 | 53.958113 | 58.168221 | 2049 | H | 64.750990 | 59.248795 | 59.840481 |
| 2030 | H | 69.501046 | 53.278616 | 58.629377 | 2050 | C | 65.396904 | 58.510339 | 57.940026 |
| 2031 | H | 69.631115 | 54.673490 | 57.629504 | 2051 | C | 65.929545 | 57.426786 | 57.227144 |
| 2032 | N | 71.848152 | 52.483414 | 58.419036 | 2052 | H | 66.576344 | 56.693706 | 57.713536 |
| 2033 | H | 71.198092 | 51.902243 | 58.950522 | 2053 | C | 65.654419 | 57.223417 | 55.875138 |
| 2034 | H | 72.688486 | 52.019061 | 58.048834 | 2054 | H | 66.073133 | 56.348135 | 55.373394 |
| 2035 | C | 61.506464 | 46.872635 | 58.633092 | 2055 | C | 64.820898 | 58.115829 | 55.195222 |
| 2036 | H | 61.594686 | 45.810492 | 58.903399 | 2056 | O | 64.497986 | 57.987019 | 53.887478 |
| 2037 | H | 60.966100 | 46.918916 | 57.674567 | 2057 | H | 65.015589 | 57.286688 | 53.430646 |
| 2038 | N | 62.823185 | 47.465167 | 58.488901 | 2058 | C | 64.549961 | 59.379484 | 57.239366 |
| 2039 | H | 62.994199 | 48.453764 | 58.711749 | 2059 | H | 64.076082 | 60.209640 | 57.765546 |
| 2040 | C | 63.753384 | 46.899029 | 57.709024 | 2060 | C | 64.269712 | 59.196511 | 55.889782 |
| 2041 | N | 64.970670 | 47.421378 | 57.673667 | 2061 | H | 63.597804 | 59.872513 | 55.364507 |
| 2042 | H | 65.254720 | 48.175273 | 58.311374 | 2062 | C | 70.396802 | 46.310616 | 57.319018 |



|      |    |           |           |           |      |   |           |           |           |
|------|----|-----------|-----------|-----------|------|---|-----------|-----------|-----------|
| 2063 | H  | 69.704103 | 46.053720 | 56.508977 | 2085 | O | 68.669215 | 49.873754 | 60.419272 |
| 2064 | H  | 70.095859 | 45.807711 | 58.243837 | 2086 | O | 67.506006 | 52.408681 | 55.192995 |
| 2065 | C  | 70.293284 | 47.788228 | 57.514802 | 2087 | H | 63.851355 | 52.042237 | 53.454432 |
| 2066 | O  | 70.281803 | 48.351283 | 58.606115 | 2088 | O | 63.978407 | 50.200685 | 58.606646 |
| 2067 | O  | 70.175760 | 48.459969 | 56.404219 | 2089 | O | 63.380952 | 50.053867 | 56.477863 |
| 2068 | H  | 69.989159 | 49.436024 | 56.521708 | 2090 | H | 67.351125 | 51.928480 | 57.429880 |
| 2069 | Zn | 69.920486 | 48.448061 | 60.596598 | 2091 | H | 64.254112 | 51.849394 | 55.327151 |
| 2070 | C  | 66.281752 | 52.320160 | 54.895521 | 2092 | H | 63.432706 | 52.757288 | 51.137752 |
| 2071 | C  | 65.921207 | 52.718623 | 53.481813 | 2093 | H | 65.229365 | 53.798446 | 49.799512 |
| 2072 | C  | 64.656236 | 52.525159 | 52.899839 | 2094 | H | 67.514815 | 54.056634 | 50.767333 |
| 2073 | C  | 64.166631 | 50.395440 | 57.402537 | 2095 | H | 67.920980 | 53.386499 | 53.165086 |
| 2074 | C  | 65.432341 | 51.171912 | 56.961827 | 2096 | O | 67.429201 | 54.400050 | 57.029600 |
| 2075 | C  | 66.606703 | 51.189175 | 57.698478 | 2097 | H | 67.599183 | 53.765762 | 56.300250 |
| 2076 | C  | 67.026926 | 50.273827 | 58.734958 | 2098 | H | 66.697089 | 53.971385 | 57.492254 |
| 2077 | C  | 68.394813 | 50.598207 | 59.417433 | 2099 | h | 73.560526 | 54.166306 | 55.602464 |
| 2078 | C  | 65.256548 | 51.867143 | 55.733556 | 2100 | h | 60.871114 | 47.356894 | 59.374638 |
| 2079 | C  | 64.415192 | 52.917471 | 51.583049 | 2101 | h | 66.483121 | 59.249072 | 59.779468 |
| 2080 | C  | 65.434563 | 53.492491 | 50.821807 | 2102 | h | 71.387504 | 45.955801 | 57.034973 |
| 2081 | C  | 66.704633 | 53.651276 | 51.376259 | 2103 |   |           |           |           |
| 2082 | C  | 66.942477 | 53.274963 | 52.698508 | 2104 |   |           |           |           |
| 2083 | O  | 66.520897 | 49.218871 | 59.064629 | 2105 |   |           |           |           |
| 2084 | O  | 69.134195 | 51.464070 | 58.947738 | 2106 |   |           |           |           |

2107 **TS1**

|      |   |           |           |           |      |   |           |           |           |
|------|---|-----------|-----------|-----------|------|---|-----------|-----------|-----------|
| 2108 | C | 73.233840 | 54.303575 | 56.612590 | 2129 | N | 63.530829 | 45.820190 | 57.033087 |
| 2109 | H | 73.681635 | 53.399327 | 57.029186 | 2130 | H | 64.284637 | 45.269594 | 56.594872 |
| 2110 | H | 73.772310 | 55.165533 | 57.034373 | 2131 | H | 62.577604 | 45.596533 | 56.732405 |
| 2111 | N | 71.821146 | 54.374089 | 56.953845 | 2132 | C | 65.618554 | 58.697347 | 59.379034 |
| 2112 | H | 71.326905 | 55.218578 | 56.637295 | 2133 | H | 65.616994 | 57.712768 | 59.866050 |
| 2113 | C | 71.203253 | 53.672880 | 57.911098 | 2134 | H | 64.755691 | 59.237983 | 59.796046 |
| 2114 | N | 69.943926 | 53.957301 | 58.234908 | 2135 | C | 65.407598 | 58.528673 | 57.885069 |
| 2115 | H | 69.534543 | 53.342537 | 58.933362 | 2136 | C | 65.941180 | 57.452567 | 57.159122 |
| 2116 | H | 69.192969 | 54.403733 | 57.645388 | 2137 | H | 66.591765 | 56.694627 | 57.606659 |
| 2117 | N | 71.838586 | 52.704096 | 58.587012 | 2138 | C | 65.657547 | 57.271723 | 55.805679 |
| 2118 | H | 71.256862 | 52.099116 | 59.166119 | 2139 | H | 66.088170 | 56.409727 | 55.290110 |
| 2119 | H | 72.686089 | 52.259113 | 58.217612 | 2140 | C | 64.820326 | 58.169562 | 55.138844 |
| 2120 | C | 61.520963 | 47.062070 | 58.494119 | 2141 | O | 64.498653 | 58.052711 | 53.828286 |
| 2121 | H | 61.571673 | 45.984530 | 58.706372 | 2142 | H | 65.013446 | 57.349489 | 53.374839 |
| 2122 | H | 60.976000 | 47.183321 | 57.543888 | 2143 | C | 64.556641 | 59.405394 | 57.197854 |
| 2123 | N | 62.860730 | 47.602711 | 58.368880 | 2144 | H | 64.082286 | 60.228016 | 57.734947 |
| 2124 | H | 63.037239 | 48.601653 | 58.518631 | 2145 | C | 64.269355 | 59.240745 | 55.846945 |
| 2125 | C | 63.799768 | 46.981652 | 57.641896 | 2146 | H | 63.597569 | 59.925202 | 55.332451 |
| 2126 | N | 65.013219 | 47.508655 | 57.588746 | 2147 | C | 70.429822 | 46.291956 | 57.371812 |
| 2127 | H | 65.256602 | 48.330969 | 58.148101 | 2148 | H | 69.724773 | 46.060792 | 56.565001 |
| 2128 | H | 65.767012 | 47.089009 | 57.025011 | 2149 | H | 70.133848 | 45.772589 | 58.289374 |

|      |    |           |           |           |      |   |           |           |           |
|------|----|-----------|-----------|-----------|------|---|-----------|-----------|-----------|
| 2150 | C  | 70.356612 | 47.767488 | 57.601633 | 2172 | H | 64.071903 | 52.181779 | 54.027632 |
| 2151 | O  | 70.353360 | 48.305925 | 58.704507 | 2173 | O | 64.103621 | 50.340748 | 58.311545 |
| 2152 | O  | 70.264744 | 48.466622 | 56.506638 | 2174 | O | 63.734161 | 50.882270 | 56.187463 |
| 2153 | H  | 70.113163 | 49.445351 | 56.656478 | 2175 | H | 67.593322 | 52.289062 | 57.805750 |
| 2154 | Zn | 69.979957 | 48.398747 | 60.688701 | 2176 | H | 64.749658 | 53.171363 | 55.866719 |
| 2155 | C  | 66.581195 | 52.526812 | 55.024268 | 2177 | H | 63.325505 | 52.572852 | 51.657318 |
| 2156 | C  | 66.073492 | 52.884879 | 53.652472 | 2178 | H | 64.888306 | 53.564460 | 50.022114 |
| 2157 | C  | 64.750589 | 52.611077 | 53.285553 | 2179 | H | 67.262196 | 53.998977 | 50.654601 |
| 2158 | C  | 64.406815 | 50.909821 | 57.257614 | 2180 | H | 68.017543 | 53.514945 | 53.009202 |
| 2159 | C  | 65.693809 | 51.744675 | 57.199790 | 2181 | O | 67.472661 | 54.570349 | 57.341839 |
| 2160 | C  | 66.816322 | 51.532514 | 57.922284 | 2182 | H | 66.446257 | 53.734214 | 56.673206 |
| 2161 | C  | 67.166515 | 50.413880 | 58.802249 | 2183 | H | 67.164533 | 54.483015 | 58.254392 |
| 2162 | C  | 68.501035 | 50.568182 | 59.580433 | 2184 | h | 73.385163 | 54.274459 | 55.533554 |
| 2163 | C  | 65.739650 | 52.835774 | 56.184916 | 2185 | h | 60.917556 | 47.524217 | 59.275392 |
| 2164 | C  | 64.340506 | 52.828804 | 51.967164 | 2186 | h | 66.486454 | 59.248332 | 59.741294 |
| 2165 | C  | 65.231959 | 53.362227 | 51.034470 | 2187 | h | 71.412771 | 45.933676 | 57.066016 |
| 2166 | C  | 66.558605 | 53.617641 | 51.396732 | 2188 |   |           |           |           |
| 2167 | C  | 66.982356 | 53.359814 | 52.700784 | 2189 |   |           |           |           |
| 2168 | O  | 66.610204 | 49.347456 | 58.902281 | 2190 |   |           |           |           |
| 2169 | O  | 69.323379 | 51.396554 | 59.205838 | 2191 |   |           |           |           |
| 2170 | O  | 68.641164 | 49.742029 | 60.526752 | 2192 |   |           |           |           |
| 2171 | O  | 67.695166 | 52.024390 | 55.084254 | 2193 |   |           |           |           |

2194 **IMI**

|      |   |           |           |           |      |   |           |           |           |
|------|---|-----------|-----------|-----------|------|---|-----------|-----------|-----------|
| 2195 | C | 73.345312 | 54.247294 | 56.627070 | 2216 | N | 63.529268 | 45.817242 | 57.029384 |
| 2196 | H | 73.801822 | 53.330670 | 57.011281 | 2217 | H | 64.279593 | 45.257367 | 56.595142 |
| 2197 | H | 73.905885 | 55.094730 | 57.057302 | 2218 | H | 62.574947 | 45.610459 | 56.719624 |
| 2198 | N | 71.939275 | 54.295494 | 56.975891 | 2219 | C | 65.617174 | 58.721028 | 59.377268 |
| 2199 | H | 71.447701 | 55.151911 | 56.706157 | 2220 | H | 65.615167 | 57.736765 | 59.864897 |
| 2200 | C | 71.359929 | 53.671379 | 58.041189 | 2221 | H | 64.757285 | 59.264004 | 59.797237 |
| 2201 | N | 70.160584 | 54.022093 | 58.400343 | 2222 | C | 65.402860 | 58.554717 | 57.884335 |
| 2202 | H | 69.865592 | 53.456042 | 59.192805 | 2223 | C | 65.968373 | 57.499336 | 57.152954 |
| 2203 | H | 68.742242 | 54.575877 | 57.840004 | 2224 | H | 66.645665 | 56.777446 | 57.618941 |
| 2204 | N | 72.073387 | 52.691714 | 58.677933 | 2225 | C | 65.689557 | 57.318974 | 55.798203 |
| 2205 | H | 71.526833 | 52.122039 | 59.317260 | 2226 | H | 66.148468 | 56.485947 | 55.260685 |
| 2206 | H | 72.776534 | 52.155739 | 58.160364 | 2227 | C | 64.823998 | 58.194354 | 55.136824 |
| 2207 | C | 61.521823 | 47.100010 | 58.471675 | 2228 | O | 64.510246 | 58.074217 | 53.825091 |
| 2208 | H | 61.549277 | 46.019068 | 58.669419 | 2229 | H | 65.030203 | 57.372369 | 53.375846 |
| 2209 | H | 60.979174 | 47.247738 | 57.523919 | 2230 | C | 64.525338 | 59.409509 | 57.203138 |
| 2210 | N | 62.872943 | 47.613066 | 58.355224 | 2231 | H | 64.032140 | 60.218174 | 57.744285 |
| 2211 | H | 63.059741 | 48.610980 | 58.493944 | 2232 | C | 64.240731 | 59.243323 | 55.851766 |
| 2212 | C | 63.808239 | 46.976293 | 57.636485 | 2233 | H | 63.552868 | 59.914248 | 55.340794 |
| 2213 | N | 65.027821 | 47.490471 | 57.589130 | 2234 | C | 70.457613 | 46.332729 | 57.371250 |
| 2214 | H | 65.273690 | 48.311227 | 58.146560 | 2235 | H | 69.751944 | 46.119209 | 56.560084 |
| 2215 | H | 65.781619 | 47.068937 | 57.025260 | 2236 | H | 70.151049 | 45.809750 | 58.283411 |

|      |    |           |           |           |      |   |           |           |           |
|------|----|-----------|-----------|-----------|------|---|-----------|-----------|-----------|
| 2237 | C  | 70.404987 | 47.807417 | 57.620760 | 2259 | H | 63.965630 | 52.116080 | 54.063478 |
| 2238 | O  | 70.386094 | 48.325436 | 58.731553 | 2260 | O | 64.100108 | 50.335925 | 58.273498 |
| 2239 | O  | 70.343134 | 48.527837 | 56.536956 | 2261 | O | 63.788994 | 50.886632 | 56.140195 |
| 2240 | H  | 70.197151 | 49.504023 | 56.703624 | 2262 | H | 67.588184 | 52.373078 | 57.852680 |
| 2241 | Zn | 69.987227 | 48.421860 | 60.705414 | 2263 | H | 64.656616 | 53.146388 | 55.892163 |
| 2242 | C  | 66.509870 | 52.565200 | 54.991252 | 2264 | H | 63.148610 | 52.475199 | 51.715210 |
| 2243 | C  | 65.948895 | 52.843234 | 53.623567 | 2265 | H | 64.649510 | 53.475296 | 50.026999 |
| 2244 | C  | 64.619225 | 52.547607 | 53.300706 | 2266 | H | 67.038809 | 53.937615 | 50.582858 |
| 2245 | C  | 64.428897 | 50.908389 | 57.232897 | 2267 | H | 67.868608 | 53.486873 | 52.915461 |
| 2246 | C  | 65.690718 | 51.775718 | 57.216626 | 2268 | O | 67.737389 | 54.741350 | 57.741172 |
| 2247 | C  | 66.813829 | 51.607423 | 57.941599 | 2269 | H | 66.186673 | 53.775841 | 56.635061 |
| 2248 | C  | 67.178587 | 50.461608 | 58.803237 | 2270 | H | 67.418735 | 54.465025 | 58.609248 |
| 2249 | C  | 68.504774 | 50.587060 | 59.599286 | 2271 | h | 73.475679 | 54.243137 | 55.544918 |
| 2250 | C  | 65.671902 | 52.893545 | 56.206411 | 2272 | h | 60.931755 | 47.565475 | 59.261124 |
| 2251 | C  | 64.169495 | 52.745502 | 51.992445 | 2273 | h | 66.488398 | 59.270127 | 59.734374 |
| 2252 | C  | 65.025507 | 53.283339 | 51.029765 | 2274 | h | 71.434633 | 45.959240 | 57.064650 |
| 2253 | C  | 66.360388 | 53.553891 | 51.346645 | 2275 |   |           |           |           |
| 2254 | C  | 66.827322 | 53.313775 | 52.638657 | 2276 |   |           |           |           |
| 2255 | O  | 66.618371 | 49.395432 | 58.834384 | 2277 |   |           |           |           |
| 2256 | O  | 69.332397 | 51.407276 | 59.245146 | 2278 |   |           |           |           |
| 2257 | O  | 68.613682 | 49.731438 | 60.530184 | 2279 |   |           |           |           |
| 2258 | O  | 67.638194 | 52.135888 | 55.072758 | 2280 |   |           |           |           |

2281 **TS2**

|      |   |           |           |           |      |   |           |           |           |
|------|---|-----------|-----------|-----------|------|---|-----------|-----------|-----------|
| 2282 | C | 73.257327 | 54.215418 | 56.561619 | 2303 | N | 63.529808 | 45.807263 | 57.021266 |
| 2283 | H | 73.666408 | 53.269526 | 56.925348 | 2304 | H | 64.284202 | 45.250478 | 56.590201 |
| 2284 | H | 73.815767 | 55.028396 | 57.055021 | 2305 | H | 62.577801 | 45.603210 | 56.702753 |
| 2285 | N | 71.833783 | 54.289036 | 56.828012 | 2306 | C | 65.633976 | 58.710544 | 59.419394 |
| 2286 | H | 71.375245 | 55.158652 | 56.539783 | 2307 | H | 65.630403 | 57.722955 | 59.901166 |
| 2287 | C | 71.174992 | 53.670965 | 57.847215 | 2308 | H | 64.785713 | 59.258045 | 59.856303 |
| 2288 | N | 69.940930 | 54.013708 | 58.093860 | 2309 | C | 65.397158 | 58.559494 | 57.928348 |
| 2289 | H | 69.581263 | 53.483959 | 58.885319 | 2310 | C | 65.977621 | 57.529434 | 57.177578 |
| 2290 | H | 68.664156 | 54.627688 | 57.337336 | 2311 | H | 66.688871 | 56.831011 | 57.617756 |
| 2291 | N | 71.844567 | 52.725753 | 58.567611 | 2312 | C | 65.698936 | 57.346445 | 55.824563 |
| 2292 | H | 71.271664 | 52.174204 | 59.199919 | 2313 | H | 66.185201 | 56.524133 | 55.293993 |
| 2293 | H | 72.624435 | 52.212665 | 58.151779 | 2314 | C | 64.811205 | 58.211507 | 55.179610 |
| 2294 | C | 61.519004 | 47.076302 | 58.476568 | 2315 | O | 64.489107 | 58.104778 | 53.869315 |
| 2295 | H | 61.545453 | 45.996325 | 58.680321 | 2316 | H | 65.040526 | 57.443028 | 53.396546 |
| 2296 | H | 60.978708 | 47.219082 | 57.526589 | 2317 | C | 64.497931 | 59.402654 | 57.262195 |
| 2297 | N | 62.869290 | 47.590224 | 58.361723 | 2318 | H | 63.995441 | 60.199330 | 57.812198 |
| 2298 | H | 63.062354 | 48.584556 | 58.521998 | 2319 | C | 64.212191 | 59.241362 | 55.910413 |
| 2299 | C | 63.806211 | 46.959697 | 57.642104 | 2320 | H | 63.514470 | 59.906427 | 55.405558 |
| 2300 | N | 65.028097 | 47.470527 | 57.609822 | 2321 | C | 70.453610 | 46.337063 | 57.376404 |
| 2301 | H | 65.269513 | 48.286901 | 58.174205 | 2322 | H | 69.751684 | 46.127814 | 56.560876 |
| 2302 | H | 65.780813 | 47.069966 | 57.029520 | 2323 | H | 70.142828 | 45.810266 | 58.284838 |

|      |    |           |           |           |      |   |           |           |           |
|------|----|-----------|-----------|-----------|------|---|-----------|-----------|-----------|
| 2324 | C  | 70.395845 | 47.810079 | 57.629690 | 2346 | H | 64.102813 | 52.147510 | 54.106678 |
| 2325 | O  | 70.374307 | 48.328311 | 58.740667 | 2347 | O | 64.097617 | 50.275075 | 58.381853 |
| 2326 | O  | 70.330871 | 48.530373 | 56.546288 | 2348 | O | 63.739982 | 50.834218 | 56.259727 |
| 2327 | H  | 70.169756 | 49.504255 | 56.716838 | 2349 | H | 67.555141 | 52.369761 | 57.885656 |
| 2328 | Zn | 69.989062 | 48.409855 | 60.719780 | 2350 | H | 64.567272 | 53.017680 | 55.925596 |
| 2329 | C  | 66.543752 | 52.686054 | 55.152482 | 2351 | H | 63.394781 | 52.456435 | 51.720958 |
| 2330 | C  | 66.057512 | 52.989480 | 53.771611 | 2352 | H | 64.932146 | 53.533208 | 50.110571 |
| 2331 | C  | 64.770323 | 52.614705 | 53.378805 | 2353 | H | 67.251700 | 54.139616 | 50.796042 |
| 2332 | C  | 64.399160 | 50.860657 | 57.339306 | 2354 | H | 67.968840 | 53.766699 | 53.186702 |
| 2333 | C  | 65.643320 | 51.754109 | 57.303917 | 2355 | O | 67.693931 | 54.903682 | 57.142409 |
| 2334 | C  | 66.784144 | 51.603671 | 58.003432 | 2356 | H | 65.961194 | 53.810273 | 56.735342 |
| 2335 | C  | 67.176295 | 50.448606 | 58.839674 | 2357 | H | 67.326112 | 54.871438 | 58.032435 |
| 2336 | C  | 68.488733 | 50.588234 | 59.649121 | 2358 | h | 73.435858 | 54.247615 | 55.486837 |
| 2337 | C  | 65.579786 | 52.870241 | 56.300376 | 2359 | h | 60.928992 | 47.548819 | 59.261857 |
| 2338 | C  | 64.382413 | 52.784300 | 52.048084 | 2360 | h | 66.516374 | 59.251165 | 59.761693 |
| 2339 | C  | 65.262278 | 53.365504 | 51.133519 | 2361 | h | 71.433060 | 45.967358 | 57.072987 |
| 2340 | C  | 66.557253 | 53.722544 | 51.526736 | 2362 |   |           |           |           |
| 2341 | C  | 66.961030 | 53.522192 | 52.845588 | 2363 |   |           |           |           |
| 2342 | O  | 66.649210 | 49.365209 | 58.829241 | 2364 |   |           |           |           |
| 2343 | O  | 69.296951 | 51.437356 | 59.315812 | 2365 |   |           |           |           |
| 2344 | O  | 68.613548 | 49.716724 | 60.559770 | 2366 |   |           |           |           |
| 2345 | O  | 67.691160 | 52.338389 | 55.294872 | 2367 |   |           |           |           |

2368 **IM2**

|      |   |           |           |           |      |   |           |           |           |
|------|---|-----------|-----------|-----------|------|---|-----------|-----------|-----------|
| 2369 | C | 73.150455 | 54.277870 | 56.482530 | 2390 | N | 63.577146 | 45.901652 | 57.046415 |
| 2370 | H | 73.551452 | 53.324649 | 56.834705 | 2391 | H | 64.328748 | 45.342028 | 56.615489 |
| 2371 | H | 73.698032 | 55.082835 | 57.001081 | 2392 | H | 62.624020 | 45.690997 | 56.735296 |
| 2372 | N | 71.720442 | 54.336104 | 56.709301 | 2393 | C | 65.677757 | 58.633915 | 59.475166 |
| 2373 | H | 71.251952 | 55.171843 | 56.357595 | 2394 | H | 65.710042 | 57.640435 | 59.944144 |
| 2374 | C | 71.050328 | 53.777485 | 57.760930 | 2395 | H | 64.814390 | 59.148149 | 59.922595 |
| 2375 | N | 69.785021 | 54.067038 | 57.906400 | 2396 | C | 65.438178 | 58.495154 | 57.982265 |
| 2376 | H | 69.419856 | 53.623114 | 58.748126 | 2397 | C | 66.021224 | 57.482967 | 57.203968 |
| 2377 | H | 68.787146 | 54.675167 | 56.691992 | 2398 | H | 66.737907 | 56.775711 | 57.630184 |
| 2378 | N | 71.747499 | 52.957724 | 58.595659 | 2399 | C | 65.737811 | 57.335705 | 55.845970 |
| 2379 | H | 71.187355 | 52.408605 | 59.241332 | 2400 | H | 66.240349 | 56.537592 | 55.292791 |
| 2380 | H | 72.596544 | 52.488702 | 58.277228 | 2401 | C | 64.836277 | 58.209246 | 55.229202 |
| 2381 | C | 61.560728 | 47.167422 | 58.484689 | 2402 | O | 64.505713 | 58.132057 | 53.919273 |
| 2382 | H | 61.596552 | 46.086113 | 58.679161 | 2403 | H | 65.047570 | 57.472801 | 53.431625 |
| 2383 | H | 61.020447 | 47.312773 | 57.535264 | 2404 | C | 64.531618 | 59.349069 | 57.339409 |
| 2384 | N | 62.908309 | 47.690952 | 58.373495 | 2405 | H | 64.030605 | 60.131980 | 57.911038 |
| 2385 | H | 63.085868 | 48.690244 | 58.514249 | 2406 | C | 64.234801 | 59.218001 | 55.987331 |
| 2386 | C | 63.850131 | 47.060178 | 57.657606 | 2407 | H | 63.527606 | 59.889267 | 55.503482 |
| 2387 | N | 65.067513 | 47.578915 | 57.616041 | 2408 | C | 70.453498 | 46.305372 | 57.402063 |
| 2388 | H | 65.306314 | 48.402768 | 58.172518 | 2409 | H | 69.740499 | 46.079227 | 56.600740 |
| 2389 | H | 65.821179 | 47.161825 | 57.048300 | 2410 | H | 70.164748 | 45.783740 | 58.320763 |



|      |    |           |           |           |      |   |           |           |           |
|------|----|-----------|-----------|-----------|------|---|-----------|-----------|-----------|
| 2411 | C  | 70.387297 | 47.780536 | 57.641105 | 2433 | H | 64.162874 | 52.257314 | 54.041577 |
| 2412 | O  | 70.383055 | 48.309939 | 58.747009 | 2434 | O | 64.110872 | 50.452563 | 58.293738 |
| 2413 | O  | 70.298972 | 48.490349 | 56.552717 | 2435 | O | 63.840231 | 51.059463 | 56.170394 |
| 2414 | H  | 70.144376 | 49.466491 | 56.720584 | 2436 | H | 67.636465 | 52.461569 | 57.932928 |
| 2415 | Zn | 69.989711 | 48.430547 | 60.719180 | 2437 | H | 64.733501 | 53.334381 | 55.958843 |
| 2416 | C  | 66.616011 | 52.718144 | 55.123701 | 2438 | H | 63.515457 | 52.583477 | 51.628014 |
| 2417 | C  | 66.141739 | 53.058995 | 53.745031 | 2439 | H | 65.105247 | 53.644564 | 50.062470 |
| 2418 | C  | 64.853949 | 52.710307 | 53.324728 | 2440 | H | 67.409057 | 54.226596 | 50.805912 |
| 2419 | C  | 64.452445 | 51.064183 | 57.279742 | 2441 | H | 68.056203 | 53.856884 | 53.234006 |
| 2420 | C  | 65.708736 | 51.938517 | 57.309976 | 2442 | O | 68.280285 | 55.136654 | 55.945753 |
| 2421 | C  | 66.824499 | 51.736799 | 58.035976 | 2443 | H | 66.223337 | 53.958313 | 56.722334 |
| 2422 | C  | 67.173482 | 50.566173 | 58.872611 | 2444 | H | 68.891926 | 55.864139 | 55.762085 |
| 2423 | C  | 68.510987 | 50.659012 | 59.655189 | 2445 | h | 73.354900 | 54.318717 | 55.412670 |
| 2424 | C  | 65.732545 | 53.061330 | 56.307255 | 2446 | h | 60.963309 | 47.624291 | 59.273630 |
| 2425 | C  | 64.499898 | 52.894249 | 51.984833 | 2447 | h | 66.543471 | 59.199446 | 59.819810 |
| 2426 | C  | 65.409337 | 53.467092 | 51.092238 | 2448 | h | 71.431169 | 45.942477 | 57.084994 |
| 2427 | C  | 66.696841 | 53.810463 | 51.519129 | 2449 |   |           |           |           |
| 2428 | C  | 67.068128 | 53.600285 | 52.847626 | 2450 |   |           |           |           |
| 2429 | O  | 66.597306 | 49.508900 | 58.891840 | 2451 |   |           |           |           |
| 2430 | O  | 69.323925 | 51.505207 | 59.326955 | 2452 |   |           |           |           |
| 2431 | O  | 68.637217 | 49.761349 | 60.540949 | 2453 |   |           |           |           |
| 2432 | O  | 67.692951 | 52.187552 | 55.245872 | 2454 |   |           |           |           |

2455 **TS3**

|      |   |           |           |           |      |   |           |           |           |
|------|---|-----------|-----------|-----------|------|---|-----------|-----------|-----------|
| 2456 | C | 73.104056 | 54.345030 | 56.433623 | 2477 | N | 63.595099 | 45.951161 | 57.032885 |
| 2457 | H | 73.471554 | 53.382830 | 56.792739 | 2478 | H | 64.346658 | 45.388011 | 56.606990 |
| 2458 | H | 73.655747 | 55.142498 | 56.953296 | 2479 | H | 62.641951 | 45.745652 | 56.717764 |
| 2459 | N | 71.673413 | 54.447431 | 56.661587 | 2480 | C | 65.688977 | 58.624894 | 59.449157 |
| 2460 | H | 71.208645 | 55.278881 | 56.276647 | 2481 | H | 65.717424 | 57.632485 | 59.920573 |
| 2461 | C | 71.005200 | 53.849224 | 57.654758 | 2482 | H | 64.827602 | 59.142674 | 59.896559 |
| 2462 | N | 69.700253 | 54.097435 | 57.777899 | 2483 | C | 65.445921 | 58.485910 | 57.956615 |
| 2463 | H | 69.238191 | 53.634373 | 58.554745 | 2484 | C | 66.003038 | 57.459294 | 57.177891 |
| 2464 | H | 69.096138 | 54.459458 | 56.979141 | 2485 | H | 66.707875 | 56.731430 | 57.589813 |
| 2465 | N | 71.622683 | 53.037903 | 58.518945 | 2486 | C | 65.706767 | 57.309523 | 55.822716 |
| 2466 | H | 71.036073 | 52.469257 | 59.129836 | 2487 | H | 66.176615 | 56.476442 | 55.289630 |
| 2467 | H | 72.553218 | 52.656430 | 58.328004 | 2488 | C | 64.828273 | 58.206211 | 55.206863 |
| 2468 | C | 61.577964 | 47.225069 | 58.465954 | 2489 | O | 64.495771 | 58.135582 | 53.898092 |
| 2469 | H | 61.606941 | 46.140488 | 58.641778 | 2490 | H | 65.036423 | 57.476124 | 53.407689 |
| 2470 | H | 61.038148 | 47.390777 | 57.519771 | 2491 | C | 64.552375 | 59.355006 | 57.315521 |
| 2471 | N | 62.928939 | 47.740815 | 58.362679 | 2492 | H | 64.064370 | 60.145179 | 57.888374 |
| 2472 | H | 63.108207 | 48.742107 | 58.493592 | 2493 | C | 64.249415 | 59.228501 | 55.964633 |
| 2473 | C | 63.869782 | 47.107430 | 57.648155 | 2494 | H | 63.551453 | 59.910625 | 55.482860 |
| 2474 | N | 65.090195 | 47.620709 | 57.615089 | 2495 | C | 70.441730 | 46.286305 | 57.405033 |
| 2475 | H | 65.322673 | 48.449394 | 58.167836 | 2496 | H | 69.729671 | 46.051414 | 56.605292 |
| 2476 | H | 65.838687 | 47.215367 | 57.033122 | 2497 | H | 70.155499 | 45.770903 | 58.327826 |

|      |    |           |           |           |      |   |           |           |           |
|------|----|-----------|-----------|-----------|------|---|-----------|-----------|-----------|
| 2498 | C  | 70.371685 | 47.762848 | 57.625218 | 2520 | H | 64.388840 | 52.366341 | 54.143056 |
| 2499 | O  | 70.374721 | 48.312135 | 58.723296 | 2521 | O | 64.127140 | 50.473239 | 58.273054 |
| 2500 | O  | 70.276587 | 48.455633 | 56.526985 | 2522 | O | 63.840522 | 51.138590 | 56.168819 |
| 2501 | H  | 70.136390 | 49.435702 | 56.683491 | 2523 | H | 67.618359 | 52.475761 | 57.965598 |
| 2502 | Zn | 69.996175 | 48.434490 | 60.699054 | 2524 | H | 64.812232 | 53.417073 | 55.975422 |
| 2503 | C  | 66.777109 | 52.913787 | 55.255651 | 2525 | H | 63.759786 | 52.582974 | 51.723514 |
| 2504 | C  | 66.330994 | 53.263462 | 53.863467 | 2526 | H | 65.337675 | 53.619650 | 50.129768 |
| 2505 | C  | 65.075303 | 52.828591 | 53.428078 | 2527 | H | 67.609333 | 54.300452 | 50.880364 |
| 2506 | C  | 64.457730 | 51.117534 | 57.272375 | 2528 | H | 68.206334 | 54.122398 | 53.367316 |
| 2507 | C  | 65.710789 | 51.990927 | 57.332218 | 2529 | O | 67.881146 | 54.898867 | 55.765648 |
| 2508 | C  | 66.813004 | 51.750474 | 58.067296 | 2530 | H | 66.216478 | 54.050559 | 56.881321 |
| 2509 | C  | 67.181810 | 50.588956 | 58.891693 | 2531 | H | 68.188601 | 55.734399 | 55.390627 |
| 2510 | C  | 68.539477 | 50.716458 | 59.636548 | 2532 | h | 73.317981 | 54.373287 | 55.365211 |
| 2511 | C  | 65.789446 | 53.161605 | 56.395989 | 2533 | h | 60.983682 | 47.671567 | 59.263158 |
| 2512 | C  | 64.729563 | 52.941635 | 52.076021 | 2534 | h | 66.555965 | 59.188279 | 59.794114 |
| 2513 | C  | 65.632103 | 53.497361 | 51.170777 | 2535 | h | 71.422222 | 45.929684 | 57.089561 |
| 2514 | C  | 66.899430 | 53.904816 | 51.607986 | 2536 |   |           |           |           |
| 2515 | C  | 67.250454 | 53.794415 | 52.954322 | 2537 |   |           |           |           |
| 2516 | O  | 66.621996 | 49.523931 | 58.957305 | 2538 |   |           |           |           |
| 2517 | O  | 69.322621 | 51.591536 | 59.284778 | 2539 |   |           |           |           |
| 2518 | O  | 68.717781 | 49.837374 | 60.523983 | 2540 |   |           |           |           |
| 2519 | O  | 67.752356 | 52.200773 | 55.366601 | 2541 |   |           |           |           |

2542 **IM3**

|      |   |           |           |           |      |   |           |           |           |
|------|---|-----------|-----------|-----------|------|---|-----------|-----------|-----------|
| 2543 | C | 73.231793 | 54.355179 | 56.552902 | 2564 | N | 63.601034 | 45.995130 | 57.019173 |
| 2544 | H | 73.620233 | 53.406013 | 56.923261 | 2565 | H | 64.356457 | 45.436289 | 56.594896 |
| 2545 | H | 73.801032 | 55.167614 | 57.026965 | 2566 | H | 62.648058 | 45.783661 | 56.707398 |
| 2546 | N | 71.815428 | 54.469067 | 56.858854 | 2567 | C | 65.625960 | 58.674252 | 59.449486 |
| 2547 | H | 71.343414 | 55.314710 | 56.509724 | 2568 | H | 65.630859 | 57.687289 | 59.933540 |
| 2548 | C | 71.161480 | 53.805237 | 57.812227 | 2569 | H | 64.770282 | 59.213451 | 59.882078 |
| 2549 | N | 69.855931 | 54.087085 | 57.995409 | 2570 | C | 65.397070 | 58.518245 | 57.957313 |
| 2550 | H | 69.362208 | 53.489978 | 58.657988 | 2571 | C | 65.959368 | 57.476602 | 57.205173 |
| 2551 | H | 69.303536 | 54.425515 | 57.208713 | 2572 | H | 66.635165 | 56.760025 | 57.678172 |
| 2552 | N | 71.748110 | 52.912088 | 58.599575 | 2573 | C | 65.701314 | 57.310505 | 55.843911 |
| 2553 | H | 71.139906 | 52.321985 | 59.172805 | 2574 | H | 66.180788 | 56.486034 | 55.307320 |
| 2554 | H | 72.667875 | 52.511901 | 58.377482 | 2575 | C | 64.838815 | 58.203626 | 55.197847 |
| 2555 | C | 61.584463 | 47.261225 | 58.459484 | 2576 | O | 64.531281 | 58.124221 | 53.886069 |
| 2556 | H | 61.618106 | 46.175455 | 58.626779 | 2577 | H | 65.041708 | 57.428117 | 53.412108 |
| 2557 | H | 61.041486 | 47.431350 | 57.515945 | 2578 | C | 64.523747 | 59.384258 | 57.285881 |
| 2558 | N | 62.933628 | 47.781098 | 58.355929 | 2579 | H | 64.029423 | 60.185594 | 57.836763 |
| 2559 | H | 63.111458 | 48.782355 | 58.486969 | 2580 | C | 64.249007 | 59.237532 | 55.931711 |
| 2560 | C | 63.874539 | 47.151258 | 57.636234 | 2581 | H | 63.562712 | 59.913298 | 55.425148 |
| 2561 | N | 65.093195 | 47.664405 | 57.605620 | 2582 | C | 70.421832 | 46.311923 | 57.370117 |
| 2562 | H | 65.321951 | 48.503258 | 58.146166 | 2583 | H | 69.724001 | 46.079109 | 56.557421 |
| 2563 | H | 65.836015 | 47.286207 | 56.998233 | 2584 | H | 70.116246 | 45.799035 | 58.288320 |

|      |    |           |           |           |      |   |           |           |           |
|------|----|-----------|-----------|-----------|------|---|-----------|-----------|-----------|
| 2585 | C  | 70.354739 | 47.789383 | 57.589215 | 2607 | H | 64.589419 | 52.195900 | 54.305298 |
| 2586 | O  | 70.370489 | 48.336971 | 58.689767 | 2608 | O | 64.206118 | 50.515899 | 58.243483 |
| 2587 | O  | 70.253489 | 48.480358 | 56.492838 | 2609 | O | 63.844122 | 51.159395 | 56.147737 |
| 2588 | H  | 70.131218 | 49.465766 | 56.639929 | 2610 | H | 67.726930 | 52.389388 | 57.807227 |
| 2589 | Zn | 69.996287 | 48.434694 | 60.665911 | 2611 | H | 64.910364 | 53.398316 | 55.888910 |
| 2590 | C  | 67.046120 | 53.160601 | 55.255232 | 2612 | H | 63.716608 | 52.257346 | 51.983813 |
| 2591 | C  | 66.421490 | 53.237161 | 53.835521 | 2613 | H | 65.021415 | 53.364886 | 50.181531 |
| 2592 | C  | 65.181189 | 52.671051 | 53.519499 | 2614 | H | 67.318042 | 54.212850 | 50.674238 |
| 2593 | C  | 64.512755 | 51.140665 | 57.220857 | 2615 | H | 68.172982 | 54.174167 | 53.013714 |
| 2594 | C  | 65.793648 | 51.974943 | 57.222977 | 2616 | O | 67.754391 | 54.444070 | 55.473799 |
| 2595 | C  | 66.900208 | 51.696335 | 57.942679 | 2617 | H | 66.129510 | 54.054847 | 56.988814 |
| 2596 | C  | 67.239354 | 50.565831 | 58.810916 | 2618 | H | 68.622290 | 54.227182 | 55.109065 |
| 2597 | C  | 68.574147 | 50.720983 | 59.594659 | 2619 | h | 73.392661 | 54.362999 | 55.474882 |
| 2598 | C  | 65.879691 | 53.194415 | 56.353961 | 2620 | h | 60.989019 | 47.697578 | 59.261424 |
| 2599 | C  | 64.690884 | 52.699637 | 52.207845 | 2621 | h | 66.501380 | 59.225905 | 59.792101 |
| 2600 | C  | 65.434433 | 53.290265 | 51.185654 | 2622 | h | 71.407758 | 45.952371 | 57.075604 |
| 2601 | C  | 66.705602 | 53.794274 | 51.475452 | 2623 |   |           |           |           |
| 2602 | C  | 67.185654 | 53.768757 | 52.785843 | 2624 |   |           |           |           |
| 2603 | O  | 66.674011 | 49.507050 | 58.924528 | 2625 |   |           |           |           |
| 2604 | O  | 69.362533 | 51.605279 | 59.264581 | 2626 |   |           |           |           |
| 2605 | O  | 68.743716 | 49.861079 | 60.500198 | 2627 |   |           |           |           |
| 2606 | O  | 67.899078 | 52.179607 | 55.310120 | 2628 |   |           |           |           |

2629 **TS4**

|      |   |           |           |           |      |   |           |           |           |
|------|---|-----------|-----------|-----------|------|---|-----------|-----------|-----------|
| 2630 | C | 73.591329 | 54.333948 | 56.671826 | 2651 | N | 63.666747 | 46.076758 | 57.020334 |
| 2631 | H | 74.020276 | 53.435880 | 57.123068 | 2652 | H | 64.404766 | 45.496852 | 56.597480 |
| 2632 | H | 74.192183 | 55.193482 | 57.001399 | 2653 | H | 62.707416 | 45.866818 | 56.732012 |
| 2633 | N | 72.212966 | 54.502165 | 57.096144 | 2654 | C | 65.566723 | 58.730768 | 59.484873 |
| 2634 | H | 71.714863 | 55.326433 | 56.742870 | 2655 | H | 65.562830 | 57.743985 | 59.969229 |
| 2635 | C | 71.514028 | 53.735405 | 57.931190 | 2656 | H | 64.716954 | 59.277805 | 59.918939 |
| 2636 | N | 70.246299 | 54.099601 | 58.185591 | 2657 | C | 65.335368 | 58.578679 | 57.993691 |
| 2637 | H | 69.662449 | 53.486538 | 58.762622 | 2658 | C | 65.896293 | 57.538805 | 57.240107 |
| 2638 | H | 69.932259 | 55.008974 | 57.879167 | 2659 | H | 66.559312 | 56.816314 | 57.721207 |
| 2639 | N | 72.005730 | 52.652420 | 58.518282 | 2660 | C | 65.642547 | 57.382294 | 55.877200 |
| 2640 | H | 71.358247 | 52.105804 | 59.095695 | 2661 | H | 66.104820 | 56.558924 | 55.326769 |
| 2641 | H | 72.802403 | 52.134896 | 58.115560 | 2662 | C | 64.786560 | 58.280172 | 55.231103 |
| 2642 | C | 61.665396 | 47.369226 | 58.432322 | 2663 | O | 64.490223 | 58.207852 | 53.917043 |
| 2643 | H | 61.686896 | 46.280028 | 58.576521 | 2664 | H | 65.011658 | 57.524180 | 53.438099 |
| 2644 | H | 61.129986 | 47.563238 | 57.488838 | 2665 | C | 64.461200 | 59.445650 | 57.324696 |
| 2645 | N | 63.020937 | 47.875181 | 58.349002 | 2666 | H | 63.963171 | 60.241150 | 57.880074 |
| 2646 | H | 63.207103 | 48.879333 | 58.461382 | 2667 | C | 64.190728 | 59.306653 | 55.969546 |
| 2647 | C | 63.960053 | 47.231077 | 57.637427 | 2668 | H | 63.505132 | 59.983023 | 55.463906 |
| 2648 | N | 65.186064 | 47.722413 | 57.603881 | 2669 | C | 70.441544 | 46.325307 | 57.339165 |
| 2649 | H | 65.463188 | 48.568740 | 58.125077 | 2670 | H | 69.748659 | 46.105190 | 56.519256 |
| 2650 | H | 65.915715 | 47.280279 | 57.026452 | 2671 | H | 70.113299 | 45.821639 | 58.254206 |

|      |    |           |           |           |      |   |           |           |           |
|------|----|-----------|-----------|-----------|------|---|-----------|-----------|-----------|
| 2672 | C  | 70.406307 | 47.803774 | 57.555030 | 2694 | H | 64.879837 | 51.963111 | 54.331730 |
| 2673 | O  | 70.403216 | 48.354554 | 58.651590 | 2695 | O | 64.210755 | 50.598792 | 58.184469 |
| 2674 | O  | 70.363335 | 48.500229 | 56.455732 | 2696 | O | 63.951069 | 51.111916 | 56.043343 |
| 2675 | H  | 70.251028 | 49.481907 | 56.621709 | 2697 | H | 67.598250 | 52.732646 | 58.075404 |
| 2676 | Zn | 69.971024 | 48.501329 | 60.607328 | 2698 | H | 64.786967 | 53.524459 | 55.888146 |
| 2677 | C  | 67.365394 | 53.001346 | 54.981881 | 2699 | H | 63.750254 | 52.102689 | 52.111017 |
| 2678 | C  | 66.570559 | 53.152069 | 53.707919 | 2700 | H | 64.773975 | 53.415702 | 50.258939 |
| 2679 | C  | 65.344975 | 52.508055 | 53.504041 | 2701 | H | 67.020023 | 54.440840 | 50.571284 |
| 2680 | C  | 64.557225 | 51.190822 | 57.156376 | 2702 | H | 68.142438 | 54.302088 | 52.818445 |
| 2681 | C  | 65.751043 | 52.152374 | 57.235960 | 2703 | O | 68.082119 | 54.140897 | 55.268809 |
| 2682 | C  | 66.872348 | 51.918289 | 58.033939 | 2704 | H | 66.270031 | 54.178546 | 56.780708 |
| 2683 | C  | 67.264651 | 50.740502 | 58.735108 | 2705 | H | 68.771676 | 53.849310 | 55.884997 |
| 2684 | C  | 68.604182 | 50.844984 | 59.518968 | 2706 | h | 73.646131 | 54.248734 | 55.586560 |
| 2685 | C  | 65.697692 | 53.312339 | 56.448117 | 2707 | h | 61.063929 | 47.786368 | 59.239971 |
| 2686 | C  | 64.711827 | 52.599795 | 52.261697 | 2708 | h | 66.448274 | 59.276475 | 59.821235 |
| 2687 | C  | 65.292752 | 53.319832 | 51.212009 | 2709 | h | 71.423692 | 45.946734 | 57.056082 |
| 2688 | C  | 66.539202 | 53.917105 | 51.400147 | 2710 |   |           |           |           |
| 2689 | C  | 67.168636 | 53.842002 | 52.646567 | 2711 |   |           |           |           |
| 2690 | O  | 66.745010 | 49.631084 | 58.762858 | 2712 |   |           |           |           |
| 2691 | O  | 69.437404 | 51.709453 | 59.217019 | 2713 |   |           |           |           |
| 2692 | O  | 68.769939 | 49.963671 | 60.411883 | 2714 |   |           |           |           |
| 2693 | O  | 67.882166 | 51.918611 | 55.263422 | 2715 |   |           |           |           |

2716 P

|      |   |           |           |           |      |   |           |           |           |
|------|---|-----------|-----------|-----------|------|---|-----------|-----------|-----------|
| 2717 | C | 73.613840 | 54.355837 | 56.706992 | 2738 | N | 63.730203 | 46.137373 | 57.034886 |
| 2718 | H | 74.068909 | 53.498650 | 57.211306 | 2739 | H | 64.458669 | 45.553225 | 56.605873 |
| 2719 | H | 74.192082 | 55.248346 | 56.982949 | 2740 | H | 62.768501 | 45.926156 | 56.759389 |
| 2720 | N | 72.235139 | 54.520584 | 57.138084 | 2741 | C | 65.554714 | 58.745206 | 59.475201 |
| 2721 | H | 71.724783 | 55.331643 | 56.771011 | 2742 | H | 65.545235 | 57.760821 | 59.963814 |
| 2722 | C | 71.517388 | 53.702313 | 57.903560 | 2743 | H | 64.707691 | 59.297843 | 59.907475 |
| 2723 | N | 70.222042 | 54.033256 | 58.118924 | 2744 | C | 65.322832 | 58.590543 | 57.984409 |
| 2724 | H | 69.684467 | 53.400744 | 58.732477 | 2745 | C | 65.881903 | 57.548989 | 57.231869 |
| 2725 | H | 70.000512 | 55.019283 | 58.096078 | 2746 | H | 66.541076 | 56.823584 | 57.713413 |
| 2726 | N | 71.997203 | 52.592526 | 58.440947 | 2747 | C | 65.626606 | 57.393438 | 55.869225 |
| 2727 | H | 71.359740 | 52.045150 | 59.032033 | 2748 | H | 66.082603 | 56.568204 | 55.316348 |
| 2728 | H | 72.805669 | 52.092777 | 58.037886 | 2749 | C | 64.774401 | 58.292893 | 55.221704 |
| 2729 | C | 61.736743 | 47.439878 | 58.429701 | 2750 | O | 64.482721 | 58.220073 | 53.905846 |
| 2730 | H | 61.755124 | 46.349859 | 58.567581 | 2751 | H | 65.010499 | 57.540212 | 53.429747 |
| 2731 | H | 61.205255 | 47.638195 | 57.484396 | 2752 | C | 64.448430 | 59.457167 | 57.315032 |
| 2732 | N | 63.093289 | 47.942702 | 58.356790 | 2753 | H | 63.949792 | 60.251786 | 57.870980 |
| 2733 | H | 63.285798 | 48.948587 | 58.467520 | 2754 | C | 64.178185 | 59.318954 | 55.959751 |
| 2734 | C | 64.031976 | 47.295893 | 57.646366 | 2755 | H | 63.492643 | 59.995397 | 55.454356 |
| 2735 | N | 65.258127 | 47.780508 | 57.598816 | 2756 | C | 70.435805 | 46.303249 | 57.336822 |
| 2736 | H | 65.575882 | 48.645451 | 58.081497 | 2757 | H | 69.742178 | 46.083684 | 56.517809 |
| 2737 | H | 65.974112 | 47.297938 | 57.038922 | 2758 | H | 70.107600 | 45.799614 | 58.251751 |



|      |    |           |           |           |      |   |           |           |           |
|------|----|-----------|-----------|-----------|------|---|-----------|-----------|-----------|
| 2759 | C  | 70.405516 | 47.781315 | 57.553515 | 2781 | H | 65.025654 | 51.957802 | 54.366551 |
| 2760 | O  | 70.410360 | 48.334454 | 58.647133 | 2782 | O | 64.211990 | 50.643194 | 58.266611 |
| 2761 | O  | 70.368637 | 48.479688 | 56.452924 | 2783 | O | 64.025084 | 51.115623 | 56.108451 |
| 2762 | H  | 70.253023 | 49.456213 | 56.637171 | 2784 | H | 67.418926 | 52.966778 | 58.479133 |
| 2763 | Zn | 69.938407 | 48.523057 | 60.589427 | 2785 | H | 64.622950 | 53.574709 | 56.047682 |
| 2764 | C  | 67.615599 | 52.877071 | 54.850818 | 2786 | H | 63.811289 | 52.156107 | 52.236417 |
| 2765 | C  | 66.749109 | 53.114089 | 53.656068 | 2787 | H | 64.750839 | 53.457504 | 50.336667 |
| 2766 | C  | 65.494126 | 52.499997 | 53.534545 | 2788 | H | 67.016959 | 54.472890 | 50.531340 |
| 2767 | C  | 64.573846 | 51.245663 | 57.248989 | 2789 | H | 68.274251 | 54.279217 | 52.698869 |
| 2768 | C  | 65.692117 | 52.289557 | 57.369896 | 2790 | O | 68.269816 | 53.950948 | 55.288622 |
| 2769 | C  | 66.830875 | 52.082600 | 58.221919 | 2791 | H | 66.196915 | 54.281619 | 56.775851 |
| 2770 | C  | 67.300850 | 50.849892 | 58.678780 | 2792 | H | 68.797862 | 53.688651 | 56.068349 |
| 2771 | C  | 68.592622 | 50.883362 | 59.522867 | 2793 | h | 73.663382 | 54.215918 | 55.627161 |
| 2772 | C  | 65.502819 | 53.442097 | 56.673893 | 2794 | h | 61.128631 | 47.849158 | 59.236395 |
| 2773 | C  | 64.789584 | 52.633127 | 52.334423 | 2795 | h | 66.439418 | 59.286335 | 59.810679 |
| 2774 | C  | 65.321226 | 53.353101 | 51.259636 | 2796 | h | 71.417823 | 45.925585 | 57.052080 |
| 2775 | C  | 66.582839 | 53.938275 | 51.378440 | 2797 |   |           |           |           |
| 2776 | C  | 67.286491 | 53.831540 | 52.582003 |      |   |           |           |           |
| 2777 | O  | 66.880744 | 49.699368 | 58.448934 |      |   |           |           |           |
| 2778 | O  | 69.479841 | 51.723314 | 59.287862 |      |   |           |           |           |
| 2779 | O  | 68.712953 | 49.959365 | 60.384961 |      |   |           |           |           |
| 2780 | O  | 67.838138 | 51.771740 | 55.272438 |      |   |           |           |           |

|      |                                   |      |           |      |         |      |           |
|------|-----------------------------------|------|-----------|------|---------|------|-----------|
| 2798 | Residue Topology File (.rtf file) |      |           | 2820 | ATOM O6 | GAO  | -0.764331 |
| 2799 | RESI MCP                          |      | -3.000    | 2821 | ATOM H2 | GAHA | 0.132956  |
| 2800 | GROUP                             |      |           | 2822 | ATOM H3 | GAHA | 0.138208  |
| 2801 | ATOM C1                           | GAC  | 0.478382  | 2823 | ATOM H4 | GAHA | 0.053973  |
| 2802 | ATOM C2                           | GACA | -0.037593 | 2824 | ATOM H5 | GAHA | 0.052472  |
| 2803 | ATOM C3                           | GACA | -0.099564 | 2825 | ATOM H6 | GAHA | 0.053973  |
| 2804 | ATOM C4                           | GAC  | 0.747709  | 2826 | ATOM H7 | GAHA | 0.076066  |
| 2805 | ATOM C5                           | GACE | 0.174351  | 2827 | BOND C1 | C2   |           |
| 2806 | ATOM C6                           | GACE | -0.374507 | 2828 | BOND C1 | C9   |           |
| 2807 | ATOM C7                           | GACF | 0.346407  | 2829 | BOND C1 | O4   |           |
| 2808 | ATOM C8                           | GAC  | 0.617579  | 2830 | BOND C2 | C3   |           |
| 2809 | ATOM C9                           | GACF | -0.585627 | 2831 | BOND C2 | C13  |           |
| 2810 | ATOM C10                          | GACA | -0.163287 | 2832 | BOND C3 | C10  |           |
| 2811 | ATOM C11                          | GACA | -0.198686 | 2833 | BOND C3 | H1   |           |
| 2812 | ATOM C12                          | GACA | -0.163287 | 2834 | BOND C4 | C5   |           |
| 2813 | ATOM C13                          | GACA | -0.099564 | 2835 | BOND C4 | O5   |           |
| 2814 | ATOM O1                           | Y4   | -0.545746 | 2836 | BOND C4 | O6   |           |
| 2815 | ATOM O2                           | GAO  | -0.746895 | 2837 | BOND C5 | C6   |           |
| 2816 | ATOM O3                           | Y5   | -0.746895 | 2838 | BOND C5 | C9   |           |
| 2817 | ATOM O4                           | GAO  | -0.657830 | 2839 | BOND C6 | C7   |           |
| 2818 | ATOM H1                           | GAHA | 0.076066  | 2840 | BOND C6 | H2   |           |
| 2819 | ATOM O5                           | GAO  | -0.764331 | 2841 | BOND C7 | C8   |           |

|      |      |     |     |      |         |     |     |       |
|------|------|-----|-----|------|---------|-----|-----|-------|
| 2842 | BOND | C7  | O1  | 2850 | BOND    | C12 | C13 |       |
| 2843 | BOND | C8  | O2  | 2851 | BOND    | C12 | H6  |       |
| 2844 | BOND | C8  | O3  | 2852 | BOND    | C13 | H7  |       |
| 2845 | BOND | C9  | H3  | 2853 |         |     |     |       |
| 2846 | BOND | C10 | C11 | 2854 | RESI ZN |     |     | 2.000 |
| 2847 | BOND | C10 | H4  | 2855 | GROUP   |     |     |       |
| 2848 | BOND | C11 | C12 | 2856 | ATOM ZN | M1  |     | 2.000 |
| 2849 | BOND | C11 | H5  | 2857 |         |     |     |       |

2858 Parameter File (.prm file)

2859 BONDS

2860 GAC GACA 345.90 1.4910

2861 GAC GACF 354.50 1.4820

2862 GAC GAO 637.70 1.2180

2863 GACA GACA 461.10 1.3980

2864 GACA GAHA 345.80 1.0860

2865 GAC GACE 354.50 1.4820

2866 GACE GACE 382.80 1.4570

2867 GACE GACF 538.60 1.3510

2868 GACE GAHA 342.50 1.0880

2869 GACF Y4 401.60 1.3500

2870 GAC Y5 637.70 1.2180

2871 GACF GAHA 342.50 1.0880

2872 M1 Y4 83.70 1.9554

2873 M1 Y5 70.60 1.9939

2874 M1 NR2 21.40 2.2113

2875 ANGLES

2876 GAC GACA GACA 64.30 120.33

2877 GAC GACF GACE 63.80 126.41

2878 GAC GACF GAHA 46.50 116.46

2879 GACA GAC GACF 62.90 119.02

|      |      |      |      |       |        |
|------|------|------|------|-------|--------|
| 2880 | GACA | GAC  | GAO  | 68.70 | 122.60 |
| 2881 | GACA | GACA | GACA | 66.60 | 120.02 |
| 2882 | GACA | GACA | GAHA | 48.20 | 119.88 |
| 2883 | GAC  | GACE | GACE | 63.10 | 120.98 |
| 2884 | GAC  | GACE | GACF | 63.80 | 126.41 |
| 2885 | GACE | GAC  | GAO  | 68.80 | 123.20 |
| 2886 | GACE | GACE | GACF | 65.00 | 124.24 |
| 2887 | GACE | GACE | GAHA | 47.20 | 116.65 |
| 2888 | GACE | GACF | GAHA | 49.80 | 118.22 |
| 2889 | GACE | GACF | Y4   | 70.60 | 121.69 |
| 2890 | GACF | GACE | GAHA | 49.80 | 118.22 |
| 2891 | GACF | GAC  | GAO  | 68.80 | 123.20 |
| 2892 | GACF | GAC  | Y5   | 68.80 | 123.20 |
| 2893 | GAC  | GACF | Y4   | 68.70 | 115.76 |
| 2894 | GAO  | GAC  | Y5   | 77.90 | 130.25 |
| 2895 | GAO  | GAC  | GAO  | 77.90 | 130.25 |
| 2896 | CPH2 | NR2  | M1   | 51.16 | 114.61 |
| 2897 | CPH1 | NR2  | M1   | 52.82 | 138.94 |
| 2898 | GACF | Y4   | M1   | 32.71 | 115.13 |
| 2899 | GAC  | Y5   | M1   | 63.04 | 113.92 |
| 2900 | NR2  | M1   | NR2  | 30.44 | 98.13  |
| 2901 | NR2  | M1   | Y4   | 33.14 | 88.64  |

|      |           |      |      |       |        |   |        |
|------|-----------|------|------|-------|--------|---|--------|
| 2902 | NR2       | M1   | Y5   | 35.17 | 125.79 |   |        |
| 2903 | Y4        | M1   | Y5   | 60.17 | 82.69  |   |        |
| 2904 | DIHEDRALS |      |      |       |        |   |        |
| 2905 | GAC       | GACA | GACA | GACA  | 3.6250 | 2 | 180.00 |
| 2906 | GAC       | GACA | GACA | GAHA  | 3.6250 | 2 | 180.00 |
| 2907 | GAC       | GACE | GACF | GAC   | 6.6500 | 2 | 180.00 |
| 2908 | GAC       | GACF | GACE | GACE  | 6.6500 | 2 | 180.00 |
| 2909 | GACA      | GAC  | GACF | GACE  | 2.1750 | 2 | 180.00 |
| 2910 | GACA      | GAC  | GACF | GAHA  | 2.1750 | 2 | 180.00 |
| 2911 | GACA      | GACA | GACA | GACA  | 3.6250 | 2 | 180.00 |
| 2912 | GACA      | GACA | GACA | GAHA  | 3.6250 | 2 | 180.00 |
| 2913 | GACA      | GACA | GAC  | GACF  | 1.0000 | 2 | 180.00 |
| 2914 | GACA      | GACA | GAC  | GAO   | 1.0000 | 2 | 180.00 |
| 2915 | GAC       | GACE | GACE | GACF  | 1.0000 | 2 | 180.00 |
| 2916 | GAC       | GACE | GACE | GAHA  | 1.0000 | 2 | 180.00 |
| 2917 | GAC       | GACE | GACF | GAHA  | 6.6500 | 2 | 180.00 |
| 2918 | GACE      | GACE | GACF | Y4    | 6.6500 | 2 | 180.00 |
| 2919 | GACE      | GACF | GAC  | GAO   | 2.1750 | 2 | 180.00 |
| 2920 | GACE      | GACE | GAC  | GAO   | 2.1750 | 2 | 180.00 |
| 2921 | GACE      | GACE | GACF | GAHA  | 6.6500 | 2 | 180.00 |
| 2922 | GACE      | GACF | GAC  | Y5    | 2.1750 | 2 | 180.00 |
| 2923 | GACF      | GACE | GACE | GACF  | 1.0000 | 2 | 180.00 |

|      |      |      |      |      |        |   |        |
|------|------|------|------|------|--------|---|--------|
| 2924 | GAC  | GACF | GACE | GAHA | 6.6500 | 2 | 180.00 |
| 2925 | GACF | GACE | GAC  | GAO  | 2.1750 | 2 | 180.00 |
| 2926 | GACF | GACE | GACE | GAHA | 1.0000 | 2 | 180.00 |
| 2927 | GAHA | GACE | GACF | Y4   | 6.6500 | 2 | 180.00 |
| 2928 | GAO  | GAC  | GACF | Y4   | 2.1750 | 2 | 180.00 |
| 2929 | Y4   | GACF | GAC  | Y5   | 2.1750 | 2 | 180.00 |
| 2930 | GAHA | GACF | GAC  | GAO  | 2.1750 | 2 | 180.00 |
| 2931 | GAHA | GACA | GACA | GAHA | 3.6250 | 2 | 180.00 |
| 2932 | CPH1 | CPH1 | NR2  | M1   | 0.0000 | 3 | 0.00   |
| 2933 | CPH2 | NR2  | M1   | Y4   | 0.0000 | 3 | 0.00   |
| 2934 | CPH2 | NR2  | M1   | Y5   | 0.0000 | 3 | 0.00   |
| 2935 | HR1  | CPH2 | NR2  | M1   | 0.0000 | 3 | 0.00   |
| 2936 | HR3  | CPH1 | NR2  | M1   | 0.0000 | 3 | 0.00   |
| 2937 | GAC  | GACF | Y4   | M1   | 0.0000 | 3 | 0.00   |
| 2938 | GACE | GACF | Y4   | M1   | 0.0000 | 3 | 0.00   |
| 2939 | GACF | GAC  | Y5   | M1   | 0.0000 | 3 | 0.00   |
| 2940 | GAO  | GAC  | Y5   | M1   | 0.0000 | 3 | 0.00   |
| 2941 | M1   | NR2  | CPH2 | NR1  | 0.0000 | 3 | 0.00   |
| 2942 | CPH2 | NR2  | M1   | NR2  | 0.0000 | 3 | 0.00   |
| 2943 | GAC  | Y5   | M1   | NR2  | 0.0000 | 3 | 0.00   |
| 2944 | CPH1 | NR2  | M1   | NR2  | 0.0000 | 3 | 0.00   |
| 2945 | GACF | Y4   | M1   | NR2  | 0.0000 | 3 | 0.00   |

|      |          |      |      |      |        |   |        |
|------|----------|------|------|------|--------|---|--------|
| 2946 | CPH1     | NR2  | M1   | Y4   | 0.0000 | 3 | 0.00   |
| 2947 | CPH1     | NR2  | M1   | Y5   | 0.0000 | 3 | 0.00   |
| 2948 | GACF     | Y4   | M1   | Y5   | 0.0000 | 3 | 0.00   |
| 2949 | GAC      | Y5   | M1   | Y4   | 0.0000 | 3 | 0.00   |
| 2950 | IMPROPER |      |      |      |        |   |        |
| 2951 | GAC      | GACA | GACA | GACA | 1.1000 | 2 | 180.00 |
| 2952 | GAC      | GACE | GACE | GACF | 1.1000 | 2 | 180.00 |
| 2953 | GAC      | GACE | GACF | GAHA | 1.1000 | 2 | 180.00 |
| 2954 | GAC      | GACE | GACF | Y4   | 1.1000 | 2 | 180.00 |
| 2955 | GACA     | GACA | GACA | GAHA | 1.1000 | 2 | 180.00 |
| 2956 | GACA     | GACF | GAC  | GAO  | 10.500 | 2 | 180.00 |
| 2957 | GACE     | GACF | GACE | GAHA | 1.1000 | 2 | 180.00 |
| 2958 | GACE     | GAO  | GAC  | GAO  | 1.1000 | 2 | 180.00 |
| 2959 | GACF     | GAO  | GAC  | Y5   | 1.1000 | 2 | 180.00 |

2960 NONBONDED

|      |      |          |           |          |          |           |          |
|------|------|----------|-----------|----------|----------|-----------|----------|
| 2961 | GAC  | 0.000000 | -0.086000 | 1.908000 | 0.000000 | -0.043000 | 1.908000 |
| 2962 | GACA | 0.000000 | -0.086000 | 1.908000 | 0.000000 | -0.043000 | 1.908000 |
| 2963 | GACE | 0.000000 | -0.086000 | 1.908000 | 0.000000 | -0.043000 | 1.908000 |
| 2964 | GACF | 0.000000 | -0.086000 | 1.908000 | 0.000000 | -0.043000 | 1.908000 |
| 2965 | Y4   | 0.000000 | -0.152000 | 1.768300 | 0.000000 | -0.076000 | 1.768300 |
| 2966 | GAO  | 0.000000 | -0.210000 | 1.661200 | 0.000000 | -0.105000 | 1.661200 |
| 2967 | Y5   | 0.000000 | -0.210000 | 1.661200 | 0.000000 | -0.105000 | 1.661200 |



|      |      |          |           |          |          |           |          |
|------|------|----------|-----------|----------|----------|-----------|----------|
| 2968 | GAHA | 0.000000 | -0.015000 | 1.459000 | 0.000000 | -0.007500 | 1.459000 |
| 2969 | M1   | 0.000000 | -0.014917 | 1.395000 | 0.000000 | -0.007458 | 1.395000 |
| 2970 |      |          |           |          |          |           |          |
